# Supplementary material for: Pyrazolone-type compounds (part II): in vitro and in silico evaluation of antioxidant potential; structure–activity relationship
Source: Royal Society of Chemistry journal article supplement (doi:10.1039/d2ra08280b), 2023-01-01
Supplement: d2ra08280b1.pdf [file d2ra08280b1.pdf]

## **Pyrazolone-type compounds (part II): *In vitro* and *in silico* evaluation of antioxidant potential; structure-activity relationship**

Jovica Branković,<sup>a</sup> Vesna M. Milovanović,<sup>b</sup> Zorica D. Petrović,<sup>a</sup> Dušica Simijonović,<sup>c</sup> and Vladimir P. Petrović <sup>\*a</sup>

<sup>a</sup>*University of Kragujevac, Faculty of Science, Department of Chemistry, R. Domanovića 12, 34000 Kragujevac, Serbia.*

<sup>b</sup>*University of Kragujevac, Faculty of Agronomy, Department of Chemistry and Chemical Engineering, Cara Dušana 34, 32000 Čačak, Serbia*

<sup>c</sup> *University of Kragujevac, Institute for Information Technologies, Department of Science, Jovana Cvijića bb, 34000 Kragujevac, Serbia*

## Table of contents

|                                                                                                                                                                     |    |
|---------------------------------------------------------------------------------------------------------------------------------------------------------------------|----|
| <b>Table S1</b> Calculated stabilization energies (kJ mol <sup>-1</sup> ) for compounds <b>a–t</b> in water.....                                                    | 7  |
| <b>Table S2</b> Calculated stabilization energies (kJ mol <sup>-1</sup> ) for compounds <b>a–t</b> in benzene. ....                                                 | 8  |
| <b>Table S3.</b> Calculated bond dissociation enthalpies (kJ mol <sup>-1</sup> ) for compounds <b>a–t</b> in water. ....                                            | 9  |
| <b>Table S4</b> Calculated IP and PDE values (kJ mol <sup>-1</sup> ) for compounds <b>a–t</b> in water. ....                                                        | 10 |
| <b>Table S5.</b> Calculated PA and ETE values (kJ mol <sup>-1</sup> ) for compounds <b>a–t</b> in water. ....                                                       | 11 |
| <b>Table S6.</b> Calculated bond dissociation enthalpies (kJ mol <sup>-1</sup> ) for compounds <b>a–t</b> in benzene. ....                                          | 12 |
| <b>Table S7</b> Calculated IP and PDE values (kJ mol <sup>-1</sup> ) for compounds <b>a–t</b> in benzene. ....                                                      | 13 |
| <b>Table S8.</b> Calculated PA and ETE values (kJ mol <sup>-1</sup> ) for compounds <b>a–t</b> in benzene. ....                                                     | 14 |
| <b>Table S9.</b> Calculated reaction enthalpies (kJ mol <sup>-1</sup> ) for the reactions of compound <b>a</b> with the selected radical species in methanol. ....  | 15 |
| <b>Table S10.</b> Calculated reaction enthalpies (kJ mol <sup>-1</sup> ) for the reactions of compound <b>b</b> with the selected radical species in methanol. .... | 16 |
| <b>Table S11.</b> Calculated reaction enthalpies (kJ mol <sup>-1</sup> ) for the reactions of compound <b>c</b> with the selected radical species in methanol. .... | 17 |
| <b>Table S12.</b> Calculated reaction enthalpies (kJ mol <sup>-1</sup> ) for the reactions of compound <b>d</b> with the selected radical species in methanol. .... | 18 |
| <b>Table S13.</b> Calculated reaction enthalpies (kJ mol <sup>-1</sup> ) for the reactions of compound <b>e</b> with the selected radical species in methanol. .... | 19 |
| <b>Table S14.</b> Calculated reaction enthalpies (kJ mol <sup>-1</sup> ) for the reactions of compound <b>f</b> with the selected radical species in methanol. .... | 20 |
| <b>Table S15.</b> Calculated reaction enthalpies (kJ mol <sup>-1</sup> ) for the reactions of compound <b>g</b> with the selected radical species in methanol. .... | 21 |
| <b>Table S16.</b> Calculated reaction enthalpies (kJ mol <sup>-1</sup> ) for the reactions of compound <b>h</b> with the selected radical species in methanol. .... | 22 |
| <b>Table S17.</b> Calculated reaction enthalpies (kJ mol <sup>-1</sup> ) for the reactions of compound <b>i</b> with the selected radical species in methanol. .... | 23 |
| <b>Table S18.</b> Calculated reaction enthalpies (kJ mol <sup>-1</sup> ) for the reactions of compound <b>j</b> with the selected radical species in methanol. .... | 24 |
| <b>Table S19.</b> Calculated reaction enthalpies (kJ mol <sup>-1</sup> ) for the reactions of compound <b>k</b> with the selected radical species in methanol. .... | 25 |
| <b>Table S20.</b> Calculated reaction enthalpies (kJ mol <sup>-1</sup> ) for the reactions of compound <b>l</b> with the selected radical species in methanol. .... | 26 |
| <b>Table S21.</b> Calculated reaction enthalpies (kJ mol <sup>-1</sup> ) for the reactions of compound <b>n</b> with the selected radical species in methanol. .... | 27 |
| <b>Table S22.</b> Calculated reaction enthalpies (kJ mol <sup>-1</sup> ) for the reactions of compound <b>o</b> with the selected radical species in methanol. .... | 28 |
| <b>Table S23.</b> Calculated reaction enthalpies (kJ mol <sup>-1</sup> ) for the reactions of compound <b>p</b> with the selected radical species in methanol. .... | 29 |
| <b>Table S24.</b> Calculated reaction enthalpies (kJ mol <sup>-1</sup> ) for the reactions of compound <b>q</b> with the selected radical species in methanol. .... | 30 |

|                                                                                                                                                                     |    |
|---------------------------------------------------------------------------------------------------------------------------------------------------------------------|----|
| <b>Table S25.</b> Calculated reaction enthalpies (kJ mol <sup>-1</sup> ) for the reactions of compound <b>r</b> with the selected radical species in methanol. .... | 31 |
| <b>Table S26.</b> Calculated reaction enthalpies (kJ mol <sup>-1</sup> ) for the reactions of compound <b>s</b> with the selected radical species in methanol. .... | 32 |
| <b>Table S27.</b> Calculated reaction enthalpies (kJ mol <sup>-1</sup> ) for the reactions of compound <b>t</b> with the selected radical species in methanol. .... | 33 |
| <b>Table S28.</b> Calculated reaction enthalpies (kJ mol <sup>-1</sup> ) for the reactions of compound <b>a</b> with the selected radical species in water. ....    | 34 |
| <b>Table S29.</b> Calculated reaction enthalpies (kJ mol <sup>-1</sup> ) for the reactions of compound <b>b</b> with the selected radical species in water. ....    | 35 |
| <b>Table S30.</b> Calculated reaction enthalpies (kJ mol <sup>-1</sup> ) for the reactions of compound <b>c</b> with the selected radical species in water. ....    | 36 |
| <b>Table S31.</b> Calculated reaction enthalpies (kJ mol <sup>-1</sup> ) for the reactions of compound <b>d</b> with the selected radical species in water. ....    | 37 |
| <b>Table S32.</b> Calculated reaction enthalpies (kJ mol <sup>-1</sup> ) for the reactions of compound <b>e</b> with the selected radical species in water. ....    | 38 |
| <b>Table S33.</b> Calculated reaction enthalpies (kJ mol <sup>-1</sup> ) for the reactions of compound <b>f</b> with the selected radical species in water. ....    | 39 |
| <b>Table S34.</b> Calculated reaction enthalpies (kJ mol <sup>-1</sup> ) for the reactions of compound <b>g</b> with the selected radical species in water. ....    | 41 |
| <b>Table S35.</b> Calculated reaction enthalpies (kJ mol <sup>-1</sup> ) for the reactions of compound <b>h</b> with the selected radical species in water. ....    | 42 |
| <b>Table S36.</b> Calculated reaction enthalpies (kJ mol <sup>-1</sup> ) for the reactions of compound <b>i</b> with the selected radical species in water. ....    | 43 |
| <b>Table S37.</b> Calculated reaction enthalpies (kJ mol <sup>-1</sup> ) for the reactions of compound <b>j</b> with the selected radical species in water. ....    | 44 |
| <b>Table S38.</b> Calculated reaction enthalpies (kJ mol <sup>-1</sup> ) for the reactions of compound <b>k</b> with the selected radical species in water. ....    | 45 |
| <b>Table S39.</b> Calculated reaction enthalpies (kJ mol <sup>-1</sup> ) for the reactions of compound <b>l</b> with the selected radical species in water. ....    | 46 |
| <b>Table S40.</b> Calculated reaction enthalpies (kJ mol <sup>-1</sup> ) for the reactions of compound <b>m</b> with the selected radical species in water. ....    | 47 |
| <b>Table S41.</b> Calculated reaction enthalpies (kJ mol <sup>-1</sup> ) for the reactions of compound <b>n</b> with the selected radical species in water. ....    | 48 |
| <b>Table S42.</b> Calculated reaction enthalpies (kJ mol <sup>-1</sup> ) for the reactions of compound <b>o</b> with the selected radical species in water. ....    | 49 |
| <b>Table S43.</b> Calculated reaction enthalpies (kJ mol <sup>-1</sup> ) for the reactions of compound <b>p</b> with the selected radical species in water. ....    | 50 |
| <b>Table S44.</b> Calculated reaction enthalpies (kJ mol <sup>-1</sup> ) for the reactions of compound <b>q</b> with the selected radical species in water. ....    | 51 |
| <b>Table S45.</b> Calculated reaction enthalpies (kJ mol <sup>-1</sup> ) for the reactions of compound <b>r</b> with the selected radical species in water. ....    | 52 |

|                                                                                                                                                                    |    |
|--------------------------------------------------------------------------------------------------------------------------------------------------------------------|----|
| <b>Table S46.</b> Calculated reaction enthalpies (kJ mol <sup>-1</sup> ) for the reactions of compound <b>s</b> with the selected radical species in water. ....   | 53 |
| <b>Table S47.</b> Calculated reaction enthalpies (kJ mol <sup>-1</sup> ) for the reactions of compound <b>t</b> with the selected radical species in water. ....   | 54 |
| <b>Table S48.</b> Calculated reaction enthalpies (kJ mol <sup>-1</sup> ) for the reactions of compound <b>a</b> with the selected radical species in benzene. .... | 55 |
| <b>Table S49.</b> Calculated reaction enthalpies (kJ mol <sup>-1</sup> ) for the reactions of compound <b>b</b> with the selected radical species in benzene. .... | 56 |
| <b>Table S50.</b> Calculated reaction enthalpies (kJ mol <sup>-1</sup> ) for the reactions of compound <b>c</b> with the selected radical species in benzene. .... | 57 |
| <b>Table S51.</b> Calculated reaction enthalpies (kJ mol <sup>-1</sup> ) for the reactions of compound <b>d</b> with the selected radical species in benzene. .... | 58 |
| <b>Table S52.</b> Calculated reaction enthalpies (kJ mol <sup>-1</sup> ) for the reactions of compound <b>e</b> with the selected radical species in benzene. .... | 59 |
| <b>Table S53.</b> Calculated reaction enthalpies (kJ mol <sup>-1</sup> ) for the reactions of compound <b>f</b> with the selected radical species in benzene. .... | 60 |
| <b>Table S54.</b> Calculated reaction enthalpies (kJ mol <sup>-1</sup> ) for the reactions of compound <b>g</b> with the selected radical species in benzene. .... | 61 |
| <b>Table S55.</b> Calculated reaction enthalpies (kJ mol <sup>-1</sup> ) for the reactions of compound <b>h</b> with the selected radical species in benzene. .... | 62 |
| <b>Table S56.</b> Calculated reaction enthalpies (kJ mol <sup>-1</sup> ) for the reactions of compound <b>i</b> with the selected radical species in benzene. .... | 63 |
| <b>Table S57.</b> Calculated reaction enthalpies (kJ mol <sup>-1</sup> ) for the reactions of compound <b>j</b> with the selected radical species in benzene. .... | 64 |
| <b>Table S58.</b> Calculated reaction enthalpies (kJ mol <sup>-1</sup> ) for the reactions of compound <b>k</b> with the selected radical species in benzene. .... | 65 |
| <b>Table S59.</b> Calculated reaction enthalpies (kJ mol <sup>-1</sup> ) for the reactions of compound <b>l</b> with the selected radical species in benzene. .... | 66 |
| <b>Table S60.</b> Calculated reaction enthalpies (kJ mol <sup>-1</sup> ) for the reactions of compound <b>m</b> with the selected radical species in benzene. .... | 67 |
| <b>Table S61.</b> Calculated reaction enthalpies (kJ mol <sup>-1</sup> ) for the reactions of compound <b>n</b> with the selected radical species in benzene. .... | 68 |
| <b>Table S62.</b> Calculated reaction enthalpies (kJ mol <sup>-1</sup> ) for the reactions of compound <b>o</b> with the selected radical species in benzene. .... | 69 |
| <b>Table S63.</b> Calculated reaction enthalpies (kJ mol <sup>-1</sup> ) for the reactions of compound <b>p</b> with the selected radical species in benzene. .... | 70 |
| <b>Table S64.</b> Calculated reaction enthalpies (kJ mol <sup>-1</sup> ) for the reactions of compound <b>q</b> with the selected radical species in benzene. .... | 71 |
| <b>Table S65.</b> Calculated reaction enthalpies (kJ mol <sup>-1</sup> ) for the reactions of compound <b>r</b> with the selected radical species in benzene. .... | 72 |
| <b>Table S66.</b> Calculated reaction enthalpies (kJ mol <sup>-1</sup> ) for the reactions of compound <b>s</b> with the selected radical species in benzene. .... | 73 |



|                                                                                                                                 |    |
|---------------------------------------------------------------------------------------------------------------------------------|----|
| <b>Table S88.</b> Regression equations parameters calculated by DPPH assay for compounds <b>a–t</b> and parent pyrazolone. .... | 85 |
| <b>Figure S1.</b> Optimized geometries of compounds <b>a–e</b> in methanol. ....                                                | 86 |
| <b>Figure S2.</b> Optimized geometries of compounds <b>f–j</b> in methanol. ....                                                | 87 |
| <b>Figure S3.</b> Optimized geometries of compounds <b>k–o</b> in methanol. ....                                                | 88 |
| <b>Figure S4.</b> Optimized geometries of compounds <b>p–t</b> in methanol. ....                                                | 89 |
| <b>Figure S5.</b> Optimized geometries of compounds <b>a–e</b> in water. ....                                                   | 90 |
| <b>Figure S6.</b> Optimized geometries of compounds <b>f–j</b> in water. ....                                                   | 91 |
| <b>Figure S7.</b> Optimized geometries of compounds <b>k–o</b> in water. ....                                                   | 92 |
| <b>Figure S8.</b> Optimized geometries of compounds <b>p–t</b> in water. ....                                                   | 93 |
| <b>Figure S9.</b> Optimized geometries of compounds <b>a–e</b> in benzene. ....                                                 | 94 |
| <b>Figure S10.</b> Optimized geometries of compounds <b>f–j</b> in benzene. ....                                                | 95 |
| <b>Figure S11.</b> Optimized geometries of compounds <b>k–o</b> in benzene. ....                                                | 96 |
| <b>Figure S12.</b> Optimized geometries of compounds <b>p–t</b> in benzene. ....                                                | 97 |

**Table S1** Calculated stabilization energies (kJ mol<sup>-1</sup>) for compounds **a–t** in water.

| $\Delta E_{\text{iso}}$ (kJ mol <sup>-1</sup> ) | Ring A |        | Ring B |       | Ring C |        |        |
|-------------------------------------------------|--------|--------|--------|-------|--------|--------|--------|
|                                                 | N1     | N2     | O1     | N2    | O1     | O2     | O3     |
| Compound                                        |        |        |        |       |        |        |        |
| <b>a</b>                                        | -7.95  | -21.60 | 0.29   | 26.91 | /      | /      | /      |
| <b>b</b>                                        | -7.10  | -22.46 | -3.53  | 26.19 | -7.78  | /      | /      |
| <b>c</b>                                        | -8.15  | -22.01 | -1.23  | 26.60 | /      | -2.63  | /      |
| <b>d</b>                                        | -8.05  | -21.70 | 0.91   | 27.16 | /      | /      | -9.76  |
| <b>e</b>                                        | -7.44  | -20.46 | 0.81   | 27.07 | /      | /      | /      |
| <b>f</b>                                        | -7.26  | -20.47 | 1.19   | 27.66 | /      | /      | /      |
| <b>g</b>                                        | -7.53  | -20.88 | -1.54  | 27.46 | /      | /      | /      |
| <b>h</b>                                        | -3.00  | -15.21 | 0.20   | 31.57 | /      | /      | /      |
| <b>i</b>                                        | -6.42  | -19.38 | 2.26   | 27.85 | /      | /      | /      |
| <b>j</b>                                        | -6.17  | -18.90 | 1.55   | 29.00 | /      | /      | /      |
| <b>k</b>                                        | -5.60  | -18.20 | -1.98  | 31.77 | /      | /      | /      |
| <b>l</b>                                        | -5.57  | -19.94 | 3.39   | 28.93 | /      | /      | /      |
| <b>m</b>                                        | -6.56  | -19.50 | -4.30  | 27.55 | -34.76 | -30.78 | /      |
| <b>n</b>                                        | -7.64  | -21.27 | 0.71   | 26.41 | /      | -35.18 | -35.44 |
| <b>o</b>                                        | -7.20  | -23.79 | -3.10  | 26.44 | -25.51 | /      | /      |
| <b>p</b>                                        | -8.78  | -22.33 | 0.84   | 25.52 | /      | /      | -28.27 |
| <b>q</b>                                        | -7.57  | -21.26 | 1.58   | 27.19 | /      | /      | -43.93 |
| <b>r</b>                                        | -8.09  | -21.05 | 1.29   | 26.88 | /      | -16.48 | /      |
| <b>s</b>                                        | -7.57  | -21.19 | 1.35   | 26.70 | /      | /      | /      |
| <b>t</b>                                        | -6.06  | -19.79 | -1.83  | 27.85 | -12.23 | /      | /      |

**Table S2** Calculated stabilization energies (kJ mol<sup>-1</sup>) for compounds **a–t** in benzene.

| $\Delta E_{\text{iso}}$ (kJ mol <sup>-1</sup> ) | Ring A |        | Ring B |       | Ring C |        |        |
|-------------------------------------------------|--------|--------|--------|-------|--------|--------|--------|
|                                                 | N1     | N2     | O1     | N2    | O1     | O2     | O3     |
| Compound                                        |        |        |        |       |        |        |        |
| <b>a</b>                                        | -7.98  | -35.72 | -4.55  | 31.36 | /      | /      | /      |
| <b>b</b>                                        | -7.37  | -35.50 | -8.02  | 29.77 | -13.82 | /      | /      |
| <b>c</b>                                        | -8.23  | -36.20 | -5.43  | 31.06 | /      | -1.35  | /      |
| <b>d</b>                                        | -8.12  | -35.98 | -3.49  | 30.90 | /      | /      | -7.92  |
| <b>e</b>                                        | -6.49  | -33.74 | -2.71  | 32.35 | /      | /      | /      |
| <b>f</b>                                        | -7.19  | -34.52 | -3.99  | 32.42 | /      | /      | /      |
| <b>g</b>                                        | -7.43  | -34.86 | 12.89  | 32.13 | /      | /      | /      |
| <b>h</b>                                        | -5.53  | -29.04 | 16.55  | 33.13 | /      | /      | /      |
| <b>i</b>                                        | -2.75  | -29.33 | -3.55  | 38.83 | /      | /      | /      |
| <b>j</b>                                        | -5.99  | -32.55 | -3.21  | 34.47 | /      | /      | /      |
| <b>k</b>                                        | -7.41  | -34.42 | -9.60  | 31.49 | /      | /      | /      |
| <b>l</b>                                        | -8.31  | -36.47 | -4.26  | 30.78 | /      | /      | /      |
| <b>m</b>                                        | -6.65  | -33.73 | 11.86  | 32.72 | -44.08 | -37.39 | /      |
| <b>n</b>                                        | -8.58  | -36.12 | -6.07  | 31.15 | /      | -37.44 | -41.59 |
| <b>o</b>                                        | -7.89  | -35.50 | -6.87  | 29.25 | -19.03 | /      | /      |
| <b>p</b>                                        | -7.88  | -35.77 | 20.93  | 30.80 | /      | /      | -14.03 |
| <b>q</b>                                        | -8.81  | -36.85 | -5.95  | 30.76 | /      | /      | -30.31 |
| <b>r</b>                                        | -7.14  | -34.82 | 20.29  | 28.57 | /      | -18.55 | /      |
| <b>s</b>                                        | -8.15  | -36.52 | -5.56  | 30.48 | /      | /      | /      |
| <b>t</b>                                        | -5.71  | -32.82 | -7.51  | 32.94 | -13.19 | /      | /      |



**Table S3.** Calculated bond dissociation enthalpies (kJ mol<sup>-1</sup>) for compounds **a–t** in water.

|          | Bond dissociation enthalpy (BDE) |        |        |        |        |        |        |
|----------|----------------------------------|--------|--------|--------|--------|--------|--------|
|          | kJ/mol                           |        |        |        |        |        |        |
|          | N1 (A)                           | N2 (A) | O1 (B) | N2 (B) | O1 (C) | O2 (C) | O3 (C) |
| <b>a</b> | 342                              | 329    | 351    | 377    | /      | /      | /      |
| <b>b</b> | 343                              | 328    | 347    | 377    | 343    | /      | /      |
| <b>c</b> | 342                              | 328    | 349    | 377    | /      | 348    | /      |
| <b>d</b> | 342                              | 329    | 351    | 378    | /      | /      | 341    |
| <b>e</b> | 343                              | 330    | 351    | 377    | /      | /      | /      |
| <b>f</b> | 343                              | 330    | 352    | 378    | /      | /      | /      |
| <b>g</b> | 343                              | 329    | 349    | 378    | /      | /      | /      |
| <b>h</b> | 347                              | 335    | 351    | 382    | /      | /      | /      |
| <b>i</b> | 344                              | 331    | 353    | 378    | /      | /      | /      |
| <b>j</b> | 344                              | 331    | 352    | 379    | /      | /      | /      |
| <b>k</b> | 345                              | 332    | 348    | 382    | /      | /      | /      |
| <b>l</b> | 345                              | 330    | 354    | 379    | /      | /      | /      |
| <b>m</b> | 344                              | 331    | 346    | 378    | 316    | 320    | /      |
| <b>n</b> | 343                              | 329    | 351    | 377    | /      | 315    | 315    |
| <b>o</b> | 343                              | 327    | 347    | 377    | 325    | /      | /      |
| <b>p</b> | 342                              | 328    | 351    | 376    | /      | /      | 322    |
| <b>q</b> | 343                              | 329    | 352    | 378    | /      | /      | 306    |
| <b>r</b> | 342                              | 329    | 352    | 377    | /      | 334    | /      |
| <b>s</b> | 343                              | 329    | 352    | 377    | /      | /      | /      |
| <b>t</b> | 344                              | 331    | 349    | 378    | 338    | /      | /      |

**Table S4** Calculated IP and PDE values (kJ mol<sup>-1</sup>) for compounds **a–t** in water.

| kJ/mol   | SET-PT |        |        |        |        |        |        |        |
|----------|--------|--------|--------|--------|--------|--------|--------|--------|
|          | IP     | PDE    |        |        |        |        |        |        |
|          |        | N1 (A) | N2 (A) | O1 (B) | N2 (B) | O2 (C) | O3 (C) | O4 (C) |
| <b>a</b> | 435    | 62     | 49     | 71     | 97     | /      | /      | /      |
| <b>b</b> | 433    | 65     | 49     | 68     | 98     | 64     | /      | /      |
| <b>c</b> | 435    | 62     | 48     | 68     | 96     | /      | 67     | /      |
| <b>d</b> | 443    | 54     | 40     | 63     | 89     | /      | /      | 52     |
| <b>e</b> | 437    | 60     | 47     | 69     | 95     | /      | /      | /      |
| <b>f</b> | 437    | 61     | 48     | 69     | 96     | /      | /      | /      |
| <b>g</b> | 436    | 41     | 48     | 67     | 96     | /      | /      | /      |
| <b>h</b> | 441    | 60     | 48     | 64     | 95     | /      | /      | /      |
| <b>i</b> | 439    | 59     | 46     | 68     | 94     | /      | /      | /      |
| <b>j</b> | 440    | 58     | 49     | 66     | 93     | /      | /      | /      |
| <b>k</b> | 437    | 63     | 50     | 66     | 100    | /      | /      | /      |
| <b>l</b> | 436    | 63     | 49     | 72     | 97     | /      | /      | /      |
| <b>m</b> | 438    | 60     | 47     | 62     | 94     | 32     | 36     | /      |
| <b>n</b> | 428    | 69     | 55     | 77     | 103    | /      | 41     | 41     |
| <b>o</b> | 431    | 66     | 50     | 70     | 100    | 48     | /      | /      |
| <b>p</b> | 421    | 75     | 61     | 84     | 109    | /      | /      | 55     |
| <b>q</b> | 416    | 81     | 68     | 91     | 116    | /      | /      | 45     |
| <b>r</b> | 435    | 61     | 48     | 71     | 96     | /      | 53     | /      |
| <b>s</b> | 418    | 80     | 66     | 89     | 114    | /      | /      | /      |
| <b>t</b> | 410    | 89     | 75     | 93     | 123    | 83     | /      | /      |

**Table S5.** Calculated PA and ETE values (kJ mol<sup>-1</sup>) for compounds a–t in water.

| kJ/mol   | SPLET  |     |        |     |        |     |        |     |        |     |        |     |        |     |
|----------|--------|-----|--------|-----|--------|-----|--------|-----|--------|-----|--------|-----|--------|-----|
|          | N1 (A) |     | N2 (A) |     | O1 (B) |     | N2 (B) |     | O1 (C) |     | O2 (C) |     | O3 (C) |     |
|          | PA     | ETE |
| <b>a</b> | 144    | 353 | 140    | 343 | 181    | 324 | 203    | 329 | /      | /   | /      | /   | /      | /   |
| <b>b</b> | 143    | 355 | 138    | 344 | 174    | 327 | 202    | 329 | 159    | 338 | /      | /   | /      | /   |
| <b>c</b> | 144    | 353 | 139    | 343 | 181    | 322 | 203    | 328 | /      | /   | 161    | 341 | /      | /   |
| <b>d</b> | 145    | 352 | 140    | 343 | 181    | 324 | 203    | 329 | /      | /   | /      | /   | 162    | 333 |
| <b>e</b> | 142    | 355 | 138    | 346 | 180    | 326 | 201    | 330 | /      | /   | /      | /   | /      | /   |
| <b>f</b> | 141    | 357 | 139    | 345 | 180    | 326 | 199    | 333 | /      | /   | /      | /   | /      | /   |
| <b>g</b> | 141    | 356 | 139    | 345 | 180    | 323 | 202    | 330 | /      | /   | /      | /   | /      | /   |
| <b>h</b> | 141    | 360 | 136    | 353 | 174    | 331 | 201    | 335 | /      | /   | /      | /   | /      | /   |
| <b>i</b> | 142    | 357 | 137    | 348 | 179    | 328 | 201    | 332 | /      | /   | /      | /   | /      | /   |
| <b>j</b> | 141    | 357 | 137    | 349 | 177    | 329 | 200    | 334 | /      | /   | /      | /   | /      | /   |
| <b>k</b> | 147    | 352 | 142    | 344 | 179    | 323 | 205    | 332 | /      | /   | /      | /   | /      | /   |
| <b>l</b> | 147    | 352 | 142    | 343 | 184    | 324 | 206    | 328 | /      | /   | /      | /   | /      | /   |
| <b>m</b> | 145    | 354 | 139    | 347 | 178    | 323 | 203    | 330 | 143    | 327 | 144    | 330 | /      | /   |
| <b>n</b> | 144    | 353 | 140    | 344 | 182    | 324 | 203    | 328 | /      | /   | 146    | 324 | 147    | 323 |
| <b>o</b> | 144    | 354 | 139    | 342 | 175    | 327 | 203    | 329 | 162    | 318 | /      | /   | /      | /   |
| <b>p</b> | 144    | 352 | 140    | 343 | 182    | 324 | 203    | 328 | /      | /   | /      | /   | 162    | 314 |
| <b>q</b> | 144    | 353 | 140    | 343 | 184    | 322 | 203    | 329 | /      | /   | /      | /   | 162    | 299 |
| <b>r</b> | 142    | 355 | 139    | 344 | 181    | 325 | 202    | 330 | /      | /   | 152    | 336 | /      | /   |
| <b>s</b> | 144    | 354 | 139    | 344 | 181    | 325 | 202    | 329 | /      | /   | /      | /   | /      | /   |
| <b>t</b> | 141    | 358 | 136    | 349 | 172    | 331 | 200    | 332 | 136    | 356 | /      | /   | /      | /   |

**Table S6.** Calculated bond dissociation enthalpies (kJ mol<sup>-1</sup>) for compounds **a–t** in benzene.

|          | Bond dissociation enthalpy (BDE) |        |        |        |        |        |        |
|----------|----------------------------------|--------|--------|--------|--------|--------|--------|
|          | kJ/mol                           |        |        |        |        |        |        |
|          | N1 (A)                           | N2 (A) | O1 (B) | N2 (B) | O1 (C) | O2 (C) | O3 (C) |
| <b>a</b> | 340                              | 313    | 344    | 380    | /      | /      | /      |
| <b>b</b> | 341                              | 313    | 340    | 378    | 334    | /      | /      |
| <b>c</b> | 340                              | 312    | 343    | 379    | /      | 347    | /      |
| <b>d</b> | 340                              | 312    | 345    | 379    | /      | /      | 345    |
| <b>e</b> | 342                              | 315    | 346    | 381    | /      | /      | /      |
| <b>f</b> | 341                              | 314    | 344    | 381    | /      | /      | /      |
| <b>g</b> | 341                              | 313    | 361    | 380    | /      | /      | /      |
| <b>h</b> | 343                              | 319    | 365    | 381    | /      | /      | /      |
| <b>i</b> | 364                              | 319    | 345    | 387    | /      | /      | /      |
| <b>j</b> | 342                              | 316    | 345    | 383    | /      | /      | /      |
| <b>k</b> | 341                              | 314    | 339    | 380    | /      | /      | /      |
| <b>l</b> | 340                              | 312    | 344    | 379    | /      | /      | /      |
| <b>m</b> | 342                              | 315    | 360    | 381    | 304    | 311    | /      |
| <b>n</b> | 340                              | 312    | 342    | 379    | /      | 311    | 307    |
| <b>o</b> | 340                              | 313    | 314    | 378    | 329    | /      | /      |
| <b>p</b> | 340                              | 312    | 369    | 379    | /      | /      | 334    |
| <b>q</b> | 339                              | 311    | 342    | 379    | /      | /      | 318    |
| <b>r</b> | 341                              | 313    | 369    | 377    | /      | 330    | /      |
| <b>s</b> | 340                              | 312    | 343    | 379    | /      | /      | /      |
| <b>t</b> | 343                              | 315    | 341    | 381    | 335    | /      | /      |

**Table S7** Calculated IP and PDE values (kJ mol<sup>-1</sup>) for compounds **a–t** in benzene.

| kJ/mol   | SET-PT |        |        |        |        |        |        |        |
|----------|--------|--------|--------|--------|--------|--------|--------|--------|
|          | IP     | PDE    |        |        |        |        |        |        |
|          |        | N1 (A) | N2 (A) | O1 (B) | N2 (B) | O1 (C) | O2 (C) | O3 (C) |
| <b>a</b> | 551    | 178    | 151    | 182    | 218    | /      | /      | /      |
| <b>b</b> | 544    | 186    | 158    | 186    | 223    | 180    | /      | /      |
| <b>c</b> | 549    | 180    | 152    | 183    | 220    | /      | 187    | /      |
| <b>d</b> | 550    | 179    | 151    | 184    | 218    | /      | /      | 179    |
| <b>e</b> | 557    | 174    | 147    | 178    | 213    | /      | /      | /      |
| <b>f</b> | 557    | 173    | 146    | 176    | 213    | /      | /      | /      |
| <b>g</b> | 556    | 174    | 146    | 194    | 213    | /      | /      | /      |
| <b>h</b> | 558    | 174    | 150    | 196    | 212    | /      | /      | /      |
| <b>i</b> | 567    | 167    | 141    | 167    | 209    | /      | /      | /      |
| <b>j</b> | 568    | 164    | 137    | 167    | 204    | /      | /      | /      |
| <b>k</b> | 553    | 178    | 151    | 175    | 216    | /      | /      | /      |
| <b>l</b> | 550    | 179    | 151    | 183    | 219    | /      | /      | /      |
| <b>m</b> | 543    | 187    | 160    | 206    | 227    | 150    | 157    | /      |
| <b>n</b> | 547    | 182    | 154    | 184    | 221    | /      | 153    | 149    |
| <b>o</b> | 540    | 190    | 162    | 191    | 227    | 179    | /      | /      |
| <b>p</b> | 573    | 157    | 129    | 186    | 196    | /      | /      | 151    |
| <b>q</b> | 558    | 171    | 143    | 174    | 210    | /      | /      | 149    |
| <b>r</b> | 553    | 177    | 150    | 205    | 213    | /      | 166    | /      |
| <b>s</b> | 549    | 180    | 152    | 183    | 219    | /      | /      | /      |
| <b>t</b> | 555    | 177    | 150    | 175    | 216    | 170    | /      | /      |

**Table S8.** Calculated PA and ETE values (kJ mol<sup>-1</sup>) for compounds **a–t** in benzene.

| kJ/mol   | SPLET  |     |        |     |        |     |        |     |        |     |        |     |        |     |
|----------|--------|-----|--------|-----|--------|-----|--------|-----|--------|-----|--------|-----|--------|-----|
|          | N1 (A) |     | N2 (A) |     | O1 (B) |     | N2 (B) |     | O1 (C) |     | O2 (C) |     | O3 (C) |     |
|          | PA     | ETE |
| <b>a</b> | 393    | 337 | 363    | 338 | 495    | 238 | 463    | 306 | /      | /   | /      | /   | /      | /   |
| <b>b</b> | 395    | 335 | 368    | 334 | 450    | 279 | 467    | 301 | 408    | 316 | /      | /   | /      | /   |
| <b>c</b> | 393    | 336 | 364    | 338 | 446    | 286 | 465    | 304 | /      | /   | 431    | 305 | /      | /   |
| <b>d</b> | 393    | 336 | 364    | 337 | 495    | 239 | 463    | 306 | /      | /   | /      | /   | 436    | 294 |
| <b>e</b> | 388    | 343 | 358    | 345 | 488    | 247 | 457    | 313 | /      | /   | /      | /   | /      | /   |
| <b>f</b> | 386    | 344 | 355    | 348 | 487    | 246 | 457    | 313 | /      | /   | /      | /   | /      | /   |
| <b>g</b> | 388    | 342 | 359    | 344 | 489    | 262 | 458    | 311 | /      | /   | /      | /   | /      | /   |
| <b>h</b> | 385    | 347 | 360    | 348 | 442    | 312 | 454    | 317 | /      | /   | /      | /   | /      | /   |
| <b>i</b> | 380    | 355 | 351    | 357 | 479    | 255 | 458    | 318 | /      | /   | /      | /   | /      | /   |
| <b>j</b> | 376    | 355 | 347    | 358 | 472    | 262 | 448    | 324 | /      | /   | /      | /   | /      | /   |
| <b>k</b> | 392    | 338 | 362    | 341 | 487    | 241 | 463    | 306 | /      | /   | /      | /   | /      | /   |
| <b>l</b> | 394    | 335 | 365    | 336 | 496    | 238 | 463    | 305 | /      | /   | /      | /   | /      | /   |
| <b>m</b> | 394    | 337 | 365    | 339 | 454    | 295 | 475    | 296 | 384    | 309 | 394    | 306 | /      | /   |
| <b>n</b> | 393    | 336 | 363    | 338 | 447    | 284 | 466    | 302 | /      | /   | 403    | 297 | 403    | 292 |
| <b>o</b> | 397    | 332 | 371    | 331 | 457    | 274 | 469    | 298 | 428    | 291 | /      | /   | /      | /   |
| <b>p</b> | 389    | 341 | 365    | 337 | 493    | 266 | 459    | 309 | /      | /   | /      | /   | 455    | 268 |
| <b>q</b> | 389    | 340 | 360    | 341 | 439    | 293 | 461    | 308 | /      | /   | /      | /   | 459    | 248 |
| <b>r</b> | 390    | 340 | 363    | 340 | 491    | 267 | 458    | 308 | /      | /   | 427    | 292 | /      | /   |
| <b>s</b> | 390    | 340 | 360    | 341 | 494    | 238 | 459    | 309 | /      | /   | /      | /   | /      | /   |
| <b>t</b> | 385    | 347 | 357    | 347 | 439    | 291 | 457    | 313 | 377    | 348 | /      | /   | /      | /   |

**Table S9.** Calculated reaction enthalpies (kJ mol<sup>-1</sup>) for the reactions of compound **a** with the selected radical species in methanol.

| <b>a</b>                           |        | HAT                     | SET-PT                 |                         | SPLET                  |                         |
|------------------------------------|--------|-------------------------|------------------------|-------------------------|------------------------|-------------------------|
| Radical                            |        | $\Delta H_{\text{BDE}}$ | $\Delta H_{\text{IP}}$ | $\Delta H_{\text{PDE}}$ | $\Delta H_{\text{PA}}$ | $\Delta H_{\text{ETE}}$ |
| ·OCH <sub>3</sub>                  | N1 (A) | -81                     |                        | -161                    | -73                    | -8                      |
|                                    | N2 (A) | -95                     | 80                     | -175                    | -78                    | -17                     |
|                                    | N2 (B) | -46                     |                        | -126                    | -15                    | -32                     |
|                                    | O1 (B) | -75                     |                        | -155                    | -36                    | -39                     |
| ·OC(CH <sub>3</sub> ) <sub>3</sub> | N1 (A) | -89                     |                        | -169                    | -81                    | -8                      |
|                                    | N2 (A) | -104                    | 80                     | -184                    | -87                    | -16                     |
|                                    | N2 (B) | -55                     |                        | -135                    | -23                    | -31                     |
|                                    | O1 (B) | -84                     |                        | -164                    | -45                    | -39                     |
| ·OH                                | N1 (A) | -152                    |                        | -153                    | -65                    | -87                     |
|                                    | N2 (A) | -167                    | 1                      | -168                    | -71                    | -96                     |
|                                    | N2 (B) | -118                    |                        | -119                    | -7                     | -110                    |
|                                    | O1 (B) | -147                    |                        | -148                    | -29                    | -118                    |
| ·OOH                               | N1 (A) | -12                     |                        | -115                    | -26                    | 14                      |
|                                    | N2 (A) | -27                     | 102                    | -129                    | -32                    | 6                       |
|                                    | N2 (B) | 22                      |                        | -80                     | 31                     | -9                      |
|                                    | O1 (B) | -7                      |                        | -109                    | 10                     | -17                     |
| ·OOCH <sub>3</sub>                 | N1 (A) | -5                      |                        | -116                    | -28                    | 23                      |
|                                    | N2 (A) | -19                     | 111                    | -131                    | -34                    | 14                      |
|                                    | N2 (B) | 30                      |                        | -82                     | 30                     | 0                       |
|                                    | O1 (B) | 0                       |                        | -111                    | 9                      | -8                      |
| ·OO-CH=CH <sub>2</sub>             | N1 (A) | -4                      |                        | -96                     | -8                     | 3                       |
|                                    | N2 (A) | -19                     | 92                     | -111                    | -14                    | -5                      |
|                                    | N2 (B) | 30                      |                        | -62                     | 50                     | -20                     |
|                                    | O1 (B) | 1                       |                        | -91                     | 29                     | -28                     |
| DPPH                               | N1 (A) | 24                      |                        | -56                     | 33                     | -9                      |
|                                    | N2 (A) | 9                       | 80                     | -70                     | 27                     | -17                     |
|                                    | N2 (B) | 58                      |                        | -21                     | 90                     | -32                     |
|                                    | O1 (B) | 29                      |                        | -50                     | 69                     | -40                     |
| O <sub>2</sub> <sup>-</sup>        | N1 (A) | 60                      |                        | -209                    | 46                     | 14                      |
|                                    | N2 (A) | 45                      | 269                    | -224                    | 40                     | 6                       |
|                                    | N2 (B) | 94                      |                        | -175                    | 103                    | -9                      |
|                                    | O1 (B) | 65                      |                        | -204                    | 82                     | -17                     |

**Table S10.** Calculated reaction enthalpies (kJ mol<sup>-1</sup>) for the reactions of compound **b** with the selected radical species in methanol.

| <b>b</b>                           |        | HAT                     | SET-PT                 |                         | SPLET                  |                         |
|------------------------------------|--------|-------------------------|------------------------|-------------------------|------------------------|-------------------------|
| Radical                            |        | $\Delta H_{\text{BDE}}$ | $\Delta H_{\text{IP}}$ | $\Delta H_{\text{PDE}}$ | $\Delta H_{\text{PA}}$ | $\Delta H_{\text{ETE}}$ |
| ·OCH <sub>3</sub>                  | N1 (A) | -80                     |                        | -159                    | -73                    | -7                      |
|                                    | N2 (A) | -96                     |                        | -175                    | -80                    | -16                     |
|                                    | N2 (B) | -50                     | 79                     | -129                    | -13                    | -37                     |
|                                    | O1 (B) | -78                     |                        | -157                    | -43                    | -36                     |
|                                    | O1 (C) | -83                     |                        | -162                    | -59                    | -23                     |
| ·OC(CH <sub>3</sub> ) <sub>3</sub> | N1 (A) | -88                     |                        | -168                    | -82                    | -6                      |
|                                    | N2 (A) | -104                    |                        | -184                    | -88                    | -16                     |
|                                    | N2 (B) | -58                     | 79                     | -137                    | -21                    | -37                     |
|                                    | O1 (B) | -87                     |                        | -166                    | -51                    | -35                     |
|                                    | O1 (C) | -91                     |                        | -170                    | -68                    | -23                     |
| ·OH                                | N1 (A) | -151                    |                        | -152                    | -66                    | -86                     |
|                                    | N2 (A) | -167                    |                        | -167                    | -72                    | -95                     |
|                                    | N2 (B) | -121                    | 0                      | -121                    | -5                     | -116                    |
|                                    | O1 (B) | -150                    |                        | -150                    | -35                    | -115                    |
|                                    | O1 (C) | -154                    |                        | -154                    | -52                    | -102                    |
| ·OOH                               | N1 (A) | -11                     |                        | -113                    | -27                    | 16                      |
|                                    | N2 (A) | -27                     |                        | -129                    | -34                    | 6                       |
|                                    | N2 (B) | 19                      | 101                    | -83                     | 33                     | -15                     |
|                                    | O1 (B) | -10                     |                        | -111                    | 4                      | -13                     |
|                                    | O1 (C) | -14                     |                        | -116                    | -13                    | -1                      |
| ·OOCH <sub>3</sub>                 | N1 (A) | -4                      |                        | -114                    | -29                    | 24                      |
|                                    | N2 (A) | -20                     |                        | -130                    | -35                    | 15                      |
|                                    | N2 (B) | 26                      | 110                    | -84                     | 32                     | -6                      |
|                                    | O1 (B) | -3                      |                        | -113                    | 2                      | -5                      |
|                                    | O1 (C) | -7                      |                        | -117                    | -15                    | 8                       |
| ·OO-CH=CH <sub>2</sub>             | N1 (A) | -4                      |                        | -94                     | -9                     | 5                       |
|                                    | N2 (A) | -20                     |                        | -110                    | -15                    | -5                      |
|                                    | N2 (B) | 27                      | 91                     | -64                     | 52                     | -26                     |
|                                    | O1 (B) | -2                      |                        | -93                     | 22                     | -24                     |
|                                    | O1 (C) | -7                      |                        | -97                     | 5                      | -12                     |
| DPPH                               | N1 (A) | 25                      |                        | -54                     | 32                     | -7                      |
|                                    | N2 (A) | 9                       |                        | -70                     | 25                     | -17                     |
|                                    | N2 (B) | 55                      | 79                     | -24                     | 92                     | -38                     |
|                                    | O1 (B) | 26                      |                        | -52                     | 62                     | -36                     |
|                                    | O1 (C) | 22                      |                        | -57                     | 46                     | -24                     |
| O <sub>2</sub> <sup>-</sup>        | N1 (A) | 61                      |                        | -207                    | 45                     | 16                      |
|                                    | N2 (A) | 45                      |                        | -223                    | 38                     | 6                       |
|                                    | N2 (B) | 91                      | 268                    | -177                    | 105                    | -15                     |
|                                    | O1 (B) | 62                      |                        | -206                    | 76                     | -13                     |
|                                    | O1 (C) | 58                      |                        | -210                    | 59                     | -1                      |



**Table S11.** Calculated reaction enthalpies (kJ mol<sup>-1</sup>) for the reactions of compound **c** with the selected radical species in methanol.

| <b>c</b>                           |        | HAT                     | SET-PT                 |                         | SPLET                  |                         |
|------------------------------------|--------|-------------------------|------------------------|-------------------------|------------------------|-------------------------|
| Radical                            |        | $\Delta H_{\text{BDE}}$ | $\Delta H_{\text{IP}}$ | $\Delta H_{\text{PDE}}$ | $\Delta H_{\text{PA}}$ | $\Delta H_{\text{ETE}}$ |
| ·OCH <sub>3</sub>                  | N1 (A) | -81                     |                        | -162                    | -72                    | -8                      |
|                                    | N2 (A) | -95                     |                        | -176                    | -79                    | -17                     |
|                                    | N2 (B) | -46                     | 81                     | -127                    | -12                    | -34                     |
|                                    | O1 (B) | -75                     |                        | -155                    | -35                    | -39                     |
|                                    | O2 (C) | -77                     |                        | -158                    | -57                    | -21                     |
| ·OC(CH <sub>3</sub> ) <sub>3</sub> | N1 (A) | -89                     |                        | -170                    | -81                    | -8                      |
|                                    | N2 (A) | -104                    |                        | -185                    | -87                    | -16                     |
|                                    | N2 (B) | -54                     | 81                     | -136                    | -21                    | -34                     |
|                                    | O1 (B) | -83                     |                        | -164                    | -44                    | -39                     |
|                                    | O2 (C) | -86                     |                        | -167                    | -65                    | -20                     |
| ·OH                                | N1 (A) | -152                    |                        | -154                    | -65                    | -87                     |
|                                    | N2 (A) | -167                    |                        | -169                    | -71                    | -96                     |
|                                    | N2 (B) | -118                    | 2                      | -120                    | -5                     | -113                    |
|                                    | O1 (B) | -146                    |                        | -148                    | -28                    | -118                    |
|                                    | O2 (C) | -149                    |                        | -151                    | -49                    | -100                    |
| ·OOH                               | N1 (A) | -12                     |                        | -115                    | -26                    | 14                      |
|                                    | N2 (A) | -27                     |                        | -130                    | -33                    | 6                       |
|                                    | N2 (B) | 22                      | 103                    | -81                     | 34                     | -12                     |
|                                    | O1 (B) | -6                      |                        | -109                    | 11                     | -17                     |
|                                    | O2 (C) | -9                      |                        | -112                    | -10                    | 2                       |
| ·OOCH <sub>3</sub>                 | N1 (A) | -5                      |                        | -117                    | -27                    | 23                      |
|                                    | N2 (A) | -20                     |                        | -132                    | -34                    | 14                      |
|                                    | N2 (B) | 30                      | 112                    | -82                     | 33                     | -3                      |
|                                    | O1 (B) | 1                       |                        | -111                    | 9                      | -8                      |
|                                    | O2 (C) | -1                      |                        | -113                    | -12                    | 10                      |
| ·OO-CH=CH <sub>2</sub>             | N1 (A) | -4                      |                        | -97                     | -7                     | 3                       |
|                                    | N2 (A) | -19                     |                        | -112                    | -14                    | -5                      |
|                                    | N2 (B) | 30                      | 92                     | -62                     | 53                     | -23                     |
|                                    | O1 (B) | 2                       |                        | -91                     | 29                     | -28                     |
|                                    | O2 (C) | -1                      |                        | -93                     | 8                      | -9                      |
| DPPH                               | N1 (A) | 24                      |                        | -56                     | 33                     | -9                      |
|                                    | N2 (A) | 9                       |                        | -71                     | 26                     | -17                     |
|                                    | N2 (B) | 58                      | 80                     | -22                     | 93                     | -35                     |
|                                    | O1 (B) | 30                      |                        | -50                     | 70                     | -40                     |
|                                    | O2 (C) | 27                      |                        | -53                     | 48                     | -21                     |
| O <sub>2</sub> <sup>-</sup>        | N1 (A) | 60                      |                        | -210                    | 46                     | 14                      |
|                                    | N2 (A) | 45                      |                        | -225                    | 39                     | 6                       |
|                                    | N2 (B) | 94                      | 270                    | -175                    | 106                    | -12                     |
|                                    | O1 (B) | 66                      |                        | -204                    | 83                     | -17                     |
|                                    | O2 (C) | 63                      |                        | -207                    | 62                     | 2                       |

**Table S12.** Calculated reaction enthalpies (kJ mol<sup>-1</sup>) for the reactions of compound **d** with the selected radical species in methanol.

| <b>d</b>                           |        | HAT                     | SET-PT                 |                         | SPLET                  |                         |
|------------------------------------|--------|-------------------------|------------------------|-------------------------|------------------------|-------------------------|
| Radical                            |        | $\Delta H_{\text{BDE}}$ | $\Delta H_{\text{IP}}$ | $\Delta H_{\text{PDE}}$ | $\Delta H_{\text{PA}}$ | $\Delta H_{\text{ETE}}$ |
| ·OCH <sub>3</sub>                  | N1 (A) | -80                     |                        | -169                    | -72                    | -9                      |
|                                    | N2 (A) | -95                     |                        | -184                    | -78                    | -17                     |
|                                    | N2 (B) | -45                     | 89                     | -134                    | -12                    | -33                     |
|                                    | O1 (B) | -74                     |                        | -163                    | -35                    | -40                     |
|                                    | O3 (C) | -84                     |                        | -173                    | -56                    | -29                     |
| ·OC(CH <sub>3</sub> ) <sub>3</sub> | N1 (A) | -89                     |                        | -178                    | -80                    | -8                      |
|                                    | N2 (A) | -103                    |                        | -192                    | -86                    | -17                     |
|                                    | N2 (B) | -54                     | 89                     | -143                    | -21                    | -33                     |
|                                    | O1 (B) | -83                     |                        | -172                    | -43                    | -39                     |
|                                    | O3 (C) | -93                     |                        | -182                    | -64                    | -28                     |
| ·OH                                | N1 (A) | -152                    |                        | -162                    | -64                    | -88                     |
|                                    | N2 (A) | -166                    |                        | -176                    | -70                    | -96                     |
|                                    | N2 (B) | -117                    | 10                     | -127                    | -5                     | -112                    |
|                                    | O1 (B) | -146                    |                        | -156                    | -27                    | -119                    |
|                                    | O3 (C) | -156                    |                        | -166                    | -48                    | -108                    |
| ·OOH                               | N1 (A) | -12                     |                        | -123                    | -25                    | 14                      |
|                                    | N2 (A) | -26                     |                        | -138                    | -32                    | 5                       |
|                                    | N2 (B) | 23                      | 111                    | -88                     | 34                     | -11                     |
|                                    | O1 (B) | -6                      |                        | -117                    | 11                     | -17                     |
|                                    | O3 (C) | -16                     |                        | -127                    | -10                    | -6                      |
| ·OOCH <sub>3</sub>                 | N1 (A) | -5                      |                        | -124                    | -27                    | 22                      |
|                                    | N2 (A) | -19                     |                        | -139                    | -33                    | 14                      |
|                                    | N2 (B) | 30                      | 120                    | -89                     | 33                     | -2                      |
|                                    | O1 (B) | 1                       |                        | -118                    | 10                     | -9                      |
|                                    | O3 (C) | -9                      |                        | -128                    | -11                    | 2                       |
| ·OO-CH=CH <sub>2</sub>             | N1 (A) | -4                      |                        | -104                    | -7                     | 3                       |
|                                    | N2 (A) | -19                     |                        | -119                    | -13                    | -6                      |
|                                    | N2 (B) | 31                      | 100                    | -69                     | 53                     | -22                     |
|                                    | O1 (B) | 2                       |                        | -98                     | 30                     | -28                     |
|                                    | O3 (C) | -8                      |                        | -108                    | 9                      | -17                     |
| DPPH                               | N1 (A) | 24                      |                        | -64                     | 33                     | -9                      |
|                                    | N2 (A) | 10                      |                        | -79                     | 27                     | -18                     |
|                                    | N2 (B) | 59                      | 88                     | -29                     | 93                     | -34                     |
|                                    | O1 (B) | 30                      |                        | -58                     | 70                     | -40                     |
|                                    | O3 (C) | 20                      |                        | -68                     | 49                     | -29                     |
| O <sub>2</sub> <sup>·-</sup>       | N1 (A) | 60                      |                        | -218                    | 47                     | 14                      |
|                                    | N2 (A) | 46                      |                        | -232                    | 40                     | 5                       |
|                                    | N2 (B) | 95                      | 278                    | -183                    | 106                    | -11                     |
|                                    | O1 (B) | 66                      |                        | -212                    | 83                     | -17                     |
|                                    | O3 (C) | 56                      |                        | -222                    | 62                     | -6                      |

**Table S13.** Calculated reaction enthalpies (kJ mol<sup>-1</sup>) for the reactions of compound **e** with the selected radical species in methanol.

| <b>e</b>                           |        | HAT                     | SET-PT                 |                         | SPLET                  |                         |
|------------------------------------|--------|-------------------------|------------------------|-------------------------|------------------------|-------------------------|
| Radical                            |        | $\Delta H_{\text{BDE}}$ | $\Delta H_{\text{IP}}$ | $\Delta H_{\text{PDE}}$ | $\Delta H_{\text{PA}}$ | $\Delta H_{\text{ETE}}$ |
| ·OCH <sub>3</sub>                  | N1 (A) | -80                     |                        | -163                    | -74                    | -6                      |
|                                    | N2 (A) | -94                     | 83                     | -177                    | -80                    | -14                     |
|                                    | N2 (B) | -46                     |                        | -129                    | -14                    | -32                     |
|                                    | O1 (B) | -75                     |                        | -158                    | -37                    | -37                     |
| ·OC(CH <sub>3</sub> ) <sub>3</sub> | N1 (A) | -88                     |                        |                         | -171                   | -83                     |
|                                    | N2 (A) | -102                    | 83                     | -185                    | -89                    | -14                     |
|                                    | N2 (B) | -54                     |                        | -137                    | -22                    | -32                     |
|                                    | O1 (B) | -83                     |                        | -166                    | -46                    | -37                     |
| ·OH                                | N1 (A) | -151                    |                        |                         | -155                   | -67                     |
|                                    | N2 (A) | -165                    | 4                      | -169                    | -73                    | -93                     |
|                                    | N2 (B) | -117                    |                        | -121                    | -6                     | -111                    |
|                                    | O1 (B) | -146                    |                        | -150                    | -30                    | -116                    |
| ·OOH                               | N1 (A) | -11                     |                        |                         | -117                   | -28                     |
|                                    | N2 (A) | -25                     | 105                    | -131                    | -34                    | 8                       |
|                                    | N2 (B) | 23                      |                        | -82                     | 32                     | -10                     |
|                                    | O1 (B) | -6                      |                        | -112                    | 9                      | -15                     |
| ·OOCH <sub>3</sub>                 | N1 (A) | -4                      |                        |                         | -118                   | -29                     |
|                                    | N2 (A) | -18                     | 114                    | -132                    | -35                    | 17                      |
|                                    | N2 (B) | 30                      |                        | -84                     | 31                     | -1                      |
|                                    | O1 (B) | 1                       |                        | -113                    | 7                      | -6                      |
| ·OO-CH=CH <sub>2</sub>             | N1 (A) | -4                      |                        |                         | -98                    | -9                      |
|                                    | N2 (A) | -18                     | 94                     | -112                    | -15                    | -2                      |
|                                    | N2 (B) | 31                      |                        | -64                     | 51                     | -20                     |
|                                    | O1 (B) | 1                       |                        | -93                     | 27                     | -26                     |
| DPPH                               | N1 (A) | 25                      |                        |                         | -58                    | 31                      |
|                                    | N2 (A) | 11                      | 82                     | -72                     | 25                     | -15                     |
|                                    | N2 (B) | 59                      |                        | -23                     | 91                     | -32                     |
|                                    | O1 (B) | 30                      |                        | -53                     | 68                     | -38                     |
| O <sub>2</sub> <sup>-</sup>        | N1 (A) | 61                      |                        |                         | -211                   | 44                      |
|                                    | N2 (A) | 47                      | 272                    | -225                    | 38                     | 8                       |
|                                    | N2 (B) | 95                      |                        | -177                    | 104                    | -10                     |
|                                    | O1 (B) | 66                      |                        | -206                    | 81                     | -15                     |

**Table S14.** Calculated reaction enthalpies (kJ mol<sup>-1</sup>) for the reactions of compound **f** with the selected radical species in methanol.

| <b>f</b>                           |        | HAT                     | SET-PT                 |                         | SPLET                  |                         |
|------------------------------------|--------|-------------------------|------------------------|-------------------------|------------------------|-------------------------|
| Radical                            |        | $\Delta H_{\text{BDE}}$ | $\Delta H_{\text{IP}}$ | $\Delta H_{\text{PDE}}$ | $\Delta H_{\text{PA}}$ | $\Delta H_{\text{ETE}}$ |
| ·OCH <sub>3</sub>                  | N1 (A) | -80                     |                        | -163                    | -73                    | -7                      |
|                                    | N2 (A) | -94                     | 83                     | -177                    | -79                    | -15                     |
|                                    | N2 (B) | -45                     |                        | -128                    | -14                    | -31                     |
|                                    | O1 (B) | -74                     |                        | -157                    | -37                    | -38                     |
| ·OC(CH <sub>3</sub> ) <sub>3</sub> | N1 (A) | -88                     |                        |                         | -171                   | -82                     |
|                                    | N2 (A) | -102                    | 83                     | -185                    | -88                    | -14                     |
|                                    | N2 (B) | -53                     |                        | -137                    | -22                    | -31                     |
|                                    | O1 (B) | -82                     |                        | -166                    | -45                    | -37                     |
| ·OH                                | N1 (A) | -151                    |                        |                         | -155                   | -66                     |
|                                    | N2 (A) | -165                    | 4                      | -169                    | -72                    | -94                     |
|                                    | N2 (B) | -117                    |                        | -121                    | -6                     | -110                    |
|                                    | O1 (B) | -146                    |                        | -150                    | -29                    | -116                    |
| ·OOH                               | N1 (A) | -11                     |                        |                         | -116                   | -27                     |
|                                    | N2 (A) | -25                     | 105                    | -131                    | -33                    | 8                       |
|                                    | N2 (B) | 23                      |                        | -82                     | 32                     | -9                      |
|                                    | O1 (B) | -6                      |                        | -111                    | 10                     | -15                     |
| ·OOCH <sub>3</sub>                 | N1 (A) | -4                      |                        |                         | -118                   | -28                     |
|                                    | N2 (A) | -18                     | 114                    | -132                    | -34                    | 16                      |
|                                    | N2 (B) | 31                      |                        | -83                     | 31                     | 0                       |
|                                    | O1 (B) | 2                       |                        | -112                    | 8                      | -6                      |
| ·OO-CH=CH <sub>2</sub>             | N1 (A) | -3                      |                        |                         | -98                    | -8                      |
|                                    | N2 (A) | -18                     | 94                     | -112                    | -14                    | -3                      |
|                                    | N2 (B) | 31                      |                        | -63                     | 51                     | -20                     |
|                                    | O1 (B) | 2                       |                        | -92                     | 28                     | -26                     |
| DPPH                               | N1 (A) | 25                      |                        |                         | -57                    | 32                      |
|                                    | N2 (A) | 11                      | 82                     | -72                     | 26                     | -15                     |
|                                    | N2 (B) | 59                      |                        | -23                     | 91                     | -32                     |
|                                    | O1 (B) | 30                      |                        | -52                     | 68                     | -38                     |
| O <sub>2</sub> <sup>-</sup>        | N1 (A) | 61                      |                        |                         | -211                   | 45                      |
|                                    | N2 (A) | 47                      | 272                    | -225                    | 39                     | 8                       |
|                                    | N2 (B) | 95                      |                        | -176                    | 104                    | -9                      |
|                                    | O1 (B) | 66                      |                        | -206                    | 82                     | -15                     |

**Table S15.** Calculated reaction enthalpies (kJ mol<sup>-1</sup>) for the reactions of compound **g** with the selected radical species in methanol.

| <b>g</b>                           |        | HAT                     | SET-PT                 |                         | SPLET                  |                         |
|------------------------------------|--------|-------------------------|------------------------|-------------------------|------------------------|-------------------------|
| Radical                            |        | $\Delta H_{\text{BDE}}$ | $\Delta H_{\text{IP}}$ | $\Delta H_{\text{PDE}}$ | $\Delta H_{\text{PA}}$ | $\Delta H_{\text{ETE}}$ |
| ·OCH <sub>3</sub>                  | N1 (A) | -80                     |                        | -162                    | -73                    | -7                      |
|                                    | N2 (A) | -94                     | 82                     | -176                    | -79                    | -15                     |
|                                    | N2 (B) | -45                     |                        | -127                    | -13                    | -32                     |
|                                    | O1 (B) | -74                     |                        | -157                    | -36                    | -38                     |
| ·OC(CH <sub>3</sub> ) <sub>3</sub> | N1 (A) | -88                     |                        |                         | -171                   | -81                     |
|                                    | N2 (A) | -103                    | 83                     | -185                    | -88                    | -15                     |
|                                    | N2 (B) | -54                     |                        | -136                    | -22                    | -32                     |
|                                    | O1 (B) | -83                     |                        | -165                    | -45                    | -38                     |
| ·OH                                | N1 (A) | -151                    |                        |                         | -155                   | -65                     |
|                                    | N2 (A) | -166                    | 3                      | -169                    | -72                    | -94                     |
|                                    | N2 (B) | -117                    |                        | -120                    | -6                     | -111                    |
|                                    | O1 (B) | -146                    |                        | -149                    | -29                    | -117                    |
| ·OOH                               | N1 (A) | -11                     |                        |                         | -116                   | -27                     |
|                                    | N2 (A) | -26                     | 105                    | -130                    | -33                    | 7                       |
|                                    | N2 (B) | 23                      |                        | -81                     | 33                     | -9                      |
|                                    | O1 (B) | -6                      |                        | -110                    | 10                     | -16                     |
| ·OOCH <sub>3</sub>                 | N1 (A) | -4                      |                        |                         | -117                   | -28                     |
|                                    | N2 (A) | -18                     | 113                    | -132                    | -34                    | 16                      |
|                                    | N2 (B) | 31                      |                        | -83                     | 31                     | -1                      |
|                                    | O1 (B) | 1                       |                        | -112                    | 8                      | -7                      |
| ·OO-CH=CH <sub>2</sub>             | N1 (A) | -4                      |                        |                         | -97                    | -8                      |
|                                    | N2 (A) | -18                     | 94                     | -112                    | -14                    | -4                      |
|                                    | N2 (B) | 31                      |                        | -63                     | 51                     | -20                     |
|                                    | O1 (B) | 2                       |                        | -92                     | 28                     | -27                     |
| DPPH                               | N1 (A) | 25                      |                        |                         | -57                    | 32                      |
|                                    | N2 (A) | 10                      | 82                     | -71                     | 26                     | -16                     |
|                                    | N2 (B) | 59                      |                        | -22                     | 92                     | -32                     |
|                                    | O1 (B) | 30                      |                        | -52                     | 69                     | -39                     |
| O <sub>2</sub> <sup>-</sup>        | N1 (A) | 61                      |                        |                         | -210                   | 45                      |
|                                    | N2 (A) | 46                      | 271                    | -225                    | 39                     | 7                       |
|                                    | N2 (B) | 95                      |                        | -176                    | 105                    | -9                      |
|                                    | O1 (B) | 66                      |                        | -205                    | 82                     | -16                     |

**Table S16.** Calculated reaction enthalpies (kJ mol<sup>-1</sup>) for the reactions of compound **h** with the selected radical species in methanol.

| <b>h</b>                           |        | HAT                     | SET-PT                 |                         | SPLET                  |                         |
|------------------------------------|--------|-------------------------|------------------------|-------------------------|------------------------|-------------------------|
| Radical                            |        | $\Delta H_{\text{BDE}}$ | $\Delta H_{\text{IP}}$ | $\Delta H_{\text{PDE}}$ | $\Delta H_{\text{PA}}$ | $\Delta H_{\text{ETE}}$ |
| ·OCH <sub>3</sub>                  | N1 (A) | -77                     |                        | -163                    | -77                    | 0                       |
|                                    | N2 (A) | -91                     | 86                     | -176                    | -84                    | -7                      |
|                                    | N2 (B) | -44                     |                        | -129                    | -16                    | -27                     |
|                                    | O1 (B) | -77                     |                        | -163                    | -45                    | -32                     |
| ·OC(CH <sub>3</sub> ) <sub>3</sub> | N1 (A) | -85                     |                        | -171                    | -86                    | 0                       |
|                                    | N2 (A) | -99                     | 86                     | -185                    | -92                    | -7                      |
|                                    | N2 (B) | -52                     |                        | -138                    | -25                    | -27                     |
|                                    | O1 (B) | -85                     |                        | -171                    | -54                    | -31                     |
| ·OH                                | N1 (A) | -149                    |                        | -155                    | -70                    | -79                     |
|                                    | N2 (A) | -162                    | 7                      | -169                    | -76                    | -86                     |
|                                    | N2 (B) | -115                    |                        | -122                    | -9                     | -106                    |
|                                    | O1 (B) | -148                    |                        | -155                    | -38                    | -111                    |
| ·OOH                               | N1 (A) | -9                      |                        | -117                    | -31                    | 22                      |
|                                    | N2 (A) | -22                     | 108                    | -130                    | -37                    | 15                      |
|                                    | N2 (B) | 25                      |                        | -83                     | 30                     | -5                      |
|                                    | O1 (B) | -8                      |                        | -116                    | 1                      | -9                      |
| ·OOCH <sub>3</sub>                 | N1 (A) | -1                      |                        | -118                    | -32                    | 31                      |
|                                    | N2 (A) | -15                     | 117                    | -131                    | -39                    | 24                      |
|                                    | N2 (B) | 32                      |                        | -84                     | 29                     | 4                       |
|                                    | O1 (B) | -1                      |                        | -118                    | -1                     | -1                      |
| ·OO-CH=CH <sub>2</sub>             | N1 (A) | -1                      |                        | -98                     | -12                    | 11                      |
|                                    | N2 (A) | -14                     | 97                     | -111                    | -19                    | 4                       |
|                                    | N2 (B) | 33                      |                        | -64                     | 49                     | -16                     |
|                                    | O1 (B) | -1                      |                        | -98                     | 19                     | -20                     |
| DPPH                               | N1 (A) | 27                      |                        | -58                     | 28                     | -1                      |
|                                    | N2 (A) | 14                      | 85                     | -71                     | 21                     | -8                      |
|                                    | N2 (B) | 61                      |                        | -24                     | 89                     | -28                     |
|                                    | O1 (B) | 28                      |                        | -57                     | 60                     | -32                     |
| O <sub>2</sub> <sup>-</sup>        | N1 (A) | 63                      |                        | -211                    | 41                     | 22                      |
|                                    | N2 (A) | 50                      | 274                    | -225                    | 35                     | 15                      |
|                                    | N2 (B) | 97                      |                        | -178                    | 102                    | -5                      |
|                                    | O1 (B) | 64                      |                        | -211                    | 73                     | -9                      |

**Table S17.** Calculated reaction enthalpies (kJ mol<sup>-1</sup>) for the reactions of compound **i** with the selected radical species in methanol.

| <b>i</b>                           |        | HAT                     | SET-PT                 |                         | SPLET                  |                         |
|------------------------------------|--------|-------------------------|------------------------|-------------------------|------------------------|-------------------------|
| Radical                            |        | $\Delta H_{\text{BDE}}$ | $\Delta H_{\text{IP}}$ | $\Delta H_{\text{PDE}}$ | $\Delta H_{\text{PA}}$ | $\Delta H_{\text{ETE}}$ |
| ·OCH <sub>3</sub>                  | N1 (A) | -77                     |                        | -164                    | -73                    | -4                      |
|                                    | N2 (A) | -91                     | 88                     | -178                    | -79                    | -11                     |
|                                    | N2 (B) | -42                     |                        | -130                    | -13                    | -30                     |
|                                    | O1 (B) | -71                     |                        | -158                    | -36                    | -35                     |
| ·OC(CH <sub>3</sub> ) <sub>3</sub> | N1 (A) | -85                     |                        | -173                    | -82                    | -3                      |
|                                    | N2 (A) | -99                     | 88                     | -187                    | -88                    | -11                     |
|                                    | N2 (B) | -51                     |                        | -139                    | -21                    | -29                     |
|                                    | O1 (B) | -79                     |                        | -167                    | -45                    | -34                     |
| ·OH                                | N1 (A) | -148                    |                        | -157                    | -66                    | -83                     |
|                                    | N2 (A) | -162                    | 9                      | -171                    | -72                    | -90                     |
|                                    | N2 (B) | -114                    |                        | -123                    | -5                     | -109                    |
|                                    | O1 (B) | -142                    |                        | -151                    | -29                    | -114                    |
| ·OOH                               | N1 (A) | -8                      |                        | -118                    | -27                    | 19                      |
|                                    | N2 (A) | -22                     | 110                    | -132                    | -33                    | 11                      |
|                                    | N2 (B) | 26                      |                        | -84                     | 34                     | -7                      |
|                                    | O1 (B) | -2                      |                        | -112                    | 10                     | -12                     |
| ·OOCH <sub>3</sub>                 | N1 (A) | -1                      |                        | -120                    | -28                    | 27                      |
|                                    | N2 (A) | -15                     | 119                    | -133                    | -34                    | 20                      |
|                                    | N2 (B) | 33                      |                        | -85                     | 32                     | 1                       |
|                                    | O1 (B) | 5                       |                        | -114                    | 9                      | -4                      |
| ·OO-CH=CH <sub>2</sub>             | N1 (A) | -1                      |                        | -100                    | -8                     | 8                       |
|                                    | N2 (A) | -14                     | 99                     | -113                    | -14                    | 0                       |
|                                    | N2 (B) | 34                      |                        | -65                     | 52                     | -18                     |
|                                    | O1 (B) | 5                       |                        | -94                     | 29                     | -23                     |
| DPPH                               | N1 (A) | 28                      |                        | -59                     | 32                     | -4                      |
|                                    | N2 (A) | 14                      | 87                     | -73                     | 26                     | -12                     |
|                                    | N2 (B) | 62                      |                        | -25                     | 92                     | -30                     |
|                                    | O1 (B) | 34                      |                        | -53                     | 69                     | -35                     |
| O <sub>2</sub> <sup>·-</sup>       | N1 (A) | 64                      |                        | -213                    | 45                     | 19                      |
|                                    | N2 (A) | 50                      | 277                    | -227                    | 39                     | 11                      |
|                                    | N2 (B) | 98                      |                        | -178                    | 106                    | -7                      |
|                                    | O1 (B) | 70                      |                        | -207                    | 82                     | -12                     |

**Table S18.** Calculated reaction enthalpies (kJ mol<sup>-1</sup>) for the reactions of compound **j** with the selected radical species in methanol.

| <b>j</b>                           |        | HAT                     | SET-PT                 |                         | SPLET                  |                         |
|------------------------------------|--------|-------------------------|------------------------|-------------------------|------------------------|-------------------------|
| Radical                            |        | $\Delta H_{\text{BDE}}$ | $\Delta H_{\text{IP}}$ | $\Delta H_{\text{PDE}}$ | $\Delta H_{\text{PA}}$ | $\Delta H_{\text{ETE}}$ |
| ·OCH <sub>3</sub>                  | N1 (A) | -79                     |                        | -165                    | -75                    | -3                      |
|                                    | N2 (A) | -92                     | 87                     | -179                    | -82                    | -11                     |
|                                    | N2 (B) | -44                     |                        | -131                    | -16                    | -28                     |
|                                    | O1 (B) | -74                     |                        | -161                    | -40                    | -34                     |
| ·OC(CH <sub>3</sub> ) <sub>3</sub> | N1 (A) | -87                     |                        | -174                    | -84                    | -3                      |
|                                    | N2 (A) | -101                    | 87                     | -188                    | -90                    | -10                     |
|                                    | N2 (B) | -52                     |                        | -139                    | -24                    | -28                     |
|                                    | O1 (B) | -82                     |                        | -169                    | -49                    | -33                     |
| ·OH                                | N1 (A) | -150                    |                        | -158                    | -68                    | -82                     |
|                                    | N2 (A) | -164                    | 8                      | -172                    | -74                    | -90                     |
|                                    | N2 (B) | -115                    |                        | -123                    | -8                     | -107                    |
|                                    | O1 (B) | -145                    |                        | -153                    | -33                    | -112                    |
| ·OOH                               | N1 (A) | -10                     |                        | -119                    | -29                    | 19                      |
|                                    | N2 (A) | -24                     | 109                    | -133                    | -36                    | 12                      |
|                                    | N2 (B) | 25                      |                        | -85                     | 30                     | -6                      |
|                                    | O1 (B) | -5                      |                        | -115                    | 6                      | -11                     |
| ·OOCH <sub>3</sub>                 | N1 (A) | -3                      |                        | -121                    | -31                    | 28                      |
|                                    | N2 (A) | -17                     | 118                    | -134                    | -37                    | 20                      |
|                                    | N2 (B) | 32                      |                        | -86                     | 29                     | 3                       |
|                                    | O1 (B) | 2                       |                        | -116                    | 4                      | -3                      |
| ·OO-CH=CH <sub>2</sub>             | N1 (A) | -2                      |                        | -101                    | -11                    | 8                       |
|                                    | N2 (A) | -16                     | 98                     | -114                    | -17                    | 1                       |
|                                    | N2 (B) | 32                      |                        | -66                     | 49                     | -16                     |
|                                    | O1 (B) | 2                       |                        | -96                     | 24                     | -22                     |
| DPPH                               | N1 (A) | 26                      |                        | -60                     | 30                     | -4                      |
|                                    | N2 (A) | 12                      | 86                     | -74                     | 23                     | -11                     |
|                                    | N2 (B) | 61                      |                        | -26                     | 89                     | -28                     |
|                                    | O1 (B) | 31                      |                        | -56                     | 65                     | -34                     |
| O <sub>2</sub> <sup>-</sup>        | N1 (A) | 62                      |                        | -214                    | 43                     | 19                      |
|                                    | N2 (A) | 48                      | 276                    | -228                    | 37                     | 12                      |
|                                    | N2 (B) | 97                      |                        | -179                    | 102                    | -6                      |
|                                    | O1 (B) | 67                      |                        | -209                    | 78                     | -11                     |



**Table S19.** Calculated reaction enthalpies (kJ mol<sup>-1</sup>) for the reactions of compound **k** with the selected radical species in methanol.

| <b>k</b>                           |        | HAT                     | SET-PT                 |                         | SPLET                  |                         |
|------------------------------------|--------|-------------------------|------------------------|-------------------------|------------------------|-------------------------|
| Radical                            |        | $\Delta H_{\text{BDE}}$ | $\Delta H_{\text{IP}}$ | $\Delta H_{\text{PDE}}$ | $\Delta H_{\text{PA}}$ | $\Delta H_{\text{ETE}}$ |
| ·OCH <sub>3</sub>                  | N1 (A) | -85                     |                        | -165                    | -71                    | -14                     |
|                                    | N2 (A) | -94                     | 80                     | -174                    | -79                    | -15                     |
|                                    | N2 (B) | -43                     |                        | -123                    | -13                    | -30                     |
|                                    | O1 (B) | -81                     |                        | -161                    | -40                    | -41                     |
| ·OC(CH <sub>3</sub> ) <sub>3</sub> | N1 (A) | -93                     |                        | -174                    | -80                    | -13                     |
|                                    | N2 (A) | -102                    | 81                     | -183                    | -87                    | -15                     |
|                                    | N2 (B) | -51                     |                        | -132                    | -21                    | -30                     |
|                                    | O1 (B) | -89                     |                        | -169                    | -48                    | -40                     |
| ·OH                                | N1 (A) | -156                    |                        | -158                    | -64                    | -93                     |
|                                    | N2 (A) | -165                    | 1                      | -167                    | -71                    | -94                     |
|                                    | N2 (B) | -115                    |                        | -116                    | -5                     | -109                    |
|                                    | O1 (B) | -152                    |                        | -153                    | -32                    | -120                    |
| ·OOH                               | N1 (A) | -16                     |                        | -119                    | -25                    | 9                       |
|                                    | N2 (A) | -25                     | 103                    | -128                    | -33                    | 7                       |
|                                    | N2 (B) | 25                      |                        | -77                     | 33                     | -8                      |
|                                    | O1 (B) | -12                     |                        | -115                    | 6                      | -18                     |
| ·OOCH <sub>3</sub>                 | N1 (A) | -9                      |                        | -120                    | -26                    | 17                      |
|                                    | N2 (A) | -18                     | 111                    | -129                    | -34                    | 16                      |
|                                    | N2 (B) | 33                      |                        | -79                     | 32                     | 1                       |
|                                    | O1 (B) | -5                      |                        | -116                    | 5                      | -10                     |
| ·OO-CH=CH <sub>2</sub>             | N1 (A) | -9                      |                        | -100                    | -6                     | -2                      |
|                                    | N2 (A) | -18                     | 92                     | -110                    | -14                    | -4                      |
|                                    | N2 (B) | 33                      |                        | -59                     | 52                     | -19                     |
|                                    | O1 (B) | -4                      |                        | -96                     | 25                     | -29                     |
| DPPH                               | N1 (A) | 20                      |                        | -60                     | 34                     | -14                     |
|                                    | N2 (A) | 11                      | 80                     | -69                     | 26                     | -16                     |
|                                    | N2 (B) | 61                      |                        | -18                     | 92                     | -31                     |
|                                    | O1 (B) | 24                      |                        | -56                     | 65                     | -41                     |
| O <sub>2</sub> <sup>-</sup>        | N1 (A) | 56                      |                        | -214                    | 47                     | 9                       |
|                                    | N2 (A) | 47                      | 269                    | -223                    | 39                     | 7                       |
|                                    | N2 (B) | 97                      |                        | -172                    | 105                    | -8                      |
|                                    | O1 (B) | 60                      |                        | -209                    | 78                     | -18                     |

**Table S20.** Calculated reaction enthalpies (kJ mol<sup>-1</sup>) for the reactions of compound **I** with the selected radical species in methanol.

| I                                  |        | HAT                     |                        | SET-PT                  |                        | SPLET                   |  |
|------------------------------------|--------|-------------------------|------------------------|-------------------------|------------------------|-------------------------|--|
| Radical                            |        | $\Delta H_{\text{BDE}}$ | $\Delta H_{\text{IP}}$ | $\Delta H_{\text{PDE}}$ | $\Delta H_{\text{PA}}$ | $\Delta H_{\text{ETE}}$ |  |
| ·OCH <sub>3</sub>                  | N1 (A) | -83                     |                        | -163                    | -72                    | -11                     |  |
|                                    | N2 (A) | -95                     | 80                     | -175                    | -78                    | -18                     |  |
|                                    | N2 (B) | -46                     |                        | -126                    | -12                    | -34                     |  |
|                                    | O1 (B) | -74                     |                        | -154                    | -35                    | -39                     |  |
|                                    |        |                         |                        |                         |                        |                         |  |
| ·OC(CH <sub>3</sub> ) <sub>3</sub> | N1 (A) | -91                     |                        | -171                    | -81                    | -11                     |  |
|                                    | N2 (A) | -104                    | 80                     | -184                    | -87                    | -17                     |  |
|                                    | N2 (B) | -55                     |                        | -135                    | -21                    | -34                     |  |
|                                    | O1 (B) | -83                     |                        | -163                    | -43                    | -39                     |  |
|                                    |        |                         |                        |                         |                        |                         |  |
| ·OH                                | N1 (A) | -154                    |                        | -155                    | -65                    | -90                     |  |
|                                    | N2 (A) | -167                    | 1                      | -168                    | -70                    | -96                     |  |
|                                    | N2 (B) | -118                    |                        | -119                    | -5                     | -113                    |  |
|                                    | O1 (B) | -146                    |                        | -147                    | -27                    | -118                    |  |
|                                    |        |                         |                        |                         |                        |                         |  |
| ·OOH                               | N1 (A) | -14                     |                        | -117                    | -26                    | 11                      |  |
|                                    | N2 (A) | -27                     | 102                    | -129                    | -32                    | 5                       |  |
|                                    | N2 (B) | 22                      |                        | -80                     | 34                     | -12                     |  |
|                                    | O1 (B) | -6                      |                        | -108                    | 11                     | -17                     |  |
|                                    |        |                         |                        |                         |                        |                         |  |
| ·OOCH <sub>3</sub>                 | N1 (A) | -7                      |                        | -118                    | -27                    | 20                      |  |
|                                    | N2 (A) | -20                     | 111                    | -130                    | -33                    | 14                      |  |
|                                    | N2 (B) | 30                      |                        | -81                     | 33                     | -3                      |  |
|                                    | O1 (B) | 1                       |                        | -109                    | 10                     | -8                      |  |
|                                    |        |                         |                        |                         |                        |                         |  |
| ·OO-CH=CH <sub>2</sub>             | N1 (A) | -7                      |                        | -98                     | -7                     | 0                       |  |
|                                    | N2 (A) | -19                     | 91                     | -110                    | -13                    | -6                      |  |
|                                    | N2 (B) | 30                      |                        | -61                     | 53                     | -23                     |  |
|                                    | O1 (B) | 2                       |                        | -89                     | 30                     | -28                     |  |
|                                    |        |                         |                        |                         |                        |                         |  |
| DPPH                               | N1 (A) | 22                      |                        | -58                     | 33                     | -12                     |  |
|                                    | N2 (A) | 9                       | 79                     | -70                     | 27                     | -18                     |  |
|                                    | N2 (B) | 58                      |                        | -21                     | 93                     | -35                     |  |
|                                    | O1 (B) | 30                      |                        | -49                     | 70                     | -40                     |  |
|                                    |        |                         |                        |                         |                        |                         |  |
| O <sub>2</sub> <sup>·-</sup>       | N1 (A) | 58                      |                        | -211                    | 46                     | 11                      |  |
|                                    | N2 (A) | 45                      | 269                    | -224                    | 40                     | 5                       |  |
|                                    | N2 (B) | 94                      |                        | -174                    | 106                    | -12                     |  |
|                                    | O1 (B) | 66                      |                        | -202                    | 83                     | -17                     |  |
|                                    |        |                         |                        |                         |                        |                         |  |

**Table S21.** Calculated reaction enthalpies (kJ mol<sup>-1</sup>) for the reactions of compound **n** with the selected radical species in methanol.

| <b>n</b>                           |        | HAT              | SET-PT          |                  | SPLET           |                  |
|------------------------------------|--------|------------------|-----------------|------------------|-----------------|------------------|
| Radical                            |        | $\Delta H_{BDE}$ | $\Delta H_{IP}$ | $\Delta H_{PDE}$ | $\Delta H_{PA}$ | $\Delta H_{ETE}$ |
| ·OCH <sub>3</sub>                  | N1 (A) | -80              | 73              | -153             | -75             | -5               |
|                                    | N2 (A) | -94              |                 | -168             | -78             | -16              |
|                                    | N2 (B) | -46              |                 | -120             | -12             | -35              |
|                                    | O1 (B) | -75              |                 | -148             | -35             | -40              |
|                                    | O2 (C) | -108             |                 | -181             | -72             | -36              |
|                                    | O3 (C) | -111             |                 | -184             | -71             | -40              |
| ·OC(CH <sub>3</sub> ) <sub>3</sub> | N1 (A) | -88              | 74              | -162             | -83             | -5               |
|                                    | N2 (A) | -103             |                 | -176             | -87             | -16              |
|                                    | N2 (B) | -55              |                 | -128             | -20             | -34              |
|                                    | O1 (B) | -83              |                 | -156             | -43             | -40              |
|                                    | O2 (C) | -116             |                 | -190             | -80             | -36              |
|                                    | O3 (C) | -119             |                 | -193             | -80             | -39              |
| ·OH                                | N1 (A) | -151             | -6              | -146             | -67             | -84              |
|                                    | N2 (A) | -166             |                 | -160             | -71             | -95              |
|                                    | N2 (B) | -118             |                 | -112             | -4              | -113             |
|                                    | O1 (B) | -146             |                 | -140             | -27             | -119             |
|                                    | O2 (C) | -179             |                 | -174             | -64             | -115             |
|                                    | O3 (C) | -182             |                 | -177             | -63             | -119             |
| ·OOH                               | N1 (A) | -11              | 96              | -107             | -29             | 17               |
|                                    | N2 (A) | -26              |                 | -122             | -32             | 6                |
|                                    | N2 (B) | 22               |                 | -73              | 34              | -12              |
|                                    | O1 (B) | -6               |                 | -102             | 12              | -18              |
|                                    | O2 (C) | -39              |                 | -135             | -26             | -14              |
|                                    | O3 (C) | -42              |                 | -138             | -25             | -17              |
| ·OOCH <sub>3</sub>                 | N1 (A) | -4               | 104             | -108             | -30             | 26               |
|                                    | N2 (A) | -19              |                 | -123             | -33             | 15               |
|                                    | N2 (B) | 29               |                 | -75              | 33              | -4               |
|                                    | O1 (B) | 1                |                 | -103             | 10              | -9               |
|                                    | O2 (C) | -22              |                 | -126             | -12             | -10              |
|                                    | O3 (C) | -35              |                 | -139             | -26             | -9               |
| ·OO-CH=CH <sub>2</sub>             | N1 (A) | -4               | 85              | -88              | -10             | 6                |
|                                    | N2 (A) | -18              |                 | -103             | -13             | -5               |
|                                    | N2 (B) | 30               |                 | -55              | 53              | -23              |
|                                    | O1 (B) | 2                |                 | -83              | 30              | -29              |
|                                    | O2 (C) | -32              |                 | -116             | -7              | -25              |
|                                    | O3 (C) | -34              |                 | -119             | -6              | -28              |
| DPPH                               | N1 (A) | 25               | 73              | -48              | 30              | -6               |
|                                    | N2 (A) | 10               |                 | -63              | 27              | -17              |
|                                    | N2 (B) | 58               |                 | -15              | 93              | -35              |
|                                    | O1 (B) | 30               |                 | -43              | 70              | -41              |
|                                    | O2 (C) | -3               |                 | -76              | 33              | -37              |
|                                    | O3 (C) | -6               |                 | -79              | 34              | -40              |
| O <sub>2</sub> <sup>-</sup>        | N1 (A) | 61               | 262             | -202             | 43              | 17               |
|                                    | N2 (A) | 46               |                 | -216             | 40              | 6                |
|                                    | N2 (B) | 94               |                 | -168             | 106             | -12              |
|                                    | O1 (B) | 33               |                 | -230             | 46              | -14              |
|                                    | O2 (C) | 43               |                 | -219             | 62              | -19              |
|                                    | O3 (C) | 30               |                 | -232             | 47              | -17              |

**Table S22.** Calculated reaction enthalpies (kJ mol<sup>-1</sup>) for the reactions of compound **o** with the selected radical species in methanol.

| <b>o</b>                           |        | HAT                     | SET-PT                 |                         | SPLET                  |                         |
|------------------------------------|--------|-------------------------|------------------------|-------------------------|------------------------|-------------------------|
| Radical                            |        | $\Delta H_{\text{BDE}}$ | $\Delta H_{\text{IP}}$ | $\Delta H_{\text{PDE}}$ | $\Delta H_{\text{PA}}$ | $\Delta H_{\text{ETE}}$ |
| ·OCH <sub>3</sub>                  | N1 (A) | -79                     |                        | -156                    | -73                    | -7                      |
|                                    | N2 (A) | -94                     |                        | -171                    | -78                    | -16                     |
|                                    | N2 (B) | -46                     | 77                     | -123                    | -12                    | -34                     |
|                                    | O1 (B) | -78                     |                        | -155                    | -42                    | -36                     |
|                                    | O1 (C) | -100                    |                        | -177                    | -56                    | -44                     |
| ·OC(CH <sub>3</sub> ) <sub>3</sub> | N1 (A) | -88                     |                        | -165                    | -81                    | -7                      |
|                                    | N2 (A) | -103                    |                        | -180                    | -87                    | -16                     |
|                                    | N2 (B) | -55                     | 77                     | -132                    | -21                    | -34                     |
|                                    | O1 (B) | -86                     |                        | -163                    | -50                    | -36                     |
|                                    | O1 (C) | -109                    |                        | -186                    | -65                    | -44                     |
| ·OH                                | N1 (A) | -151                    |                        | -149                    | -65                    | -86                     |
|                                    | N2 (A) | -166                    |                        | -164                    | -71                    | -95                     |
|                                    | N2 (B) | -118                    | -2                     | -116                    | -5                     | -113                    |
|                                    | O1 (B) | -149                    |                        | -147                    | -34                    | -115                    |
|                                    | O1 (C) | -172                    |                        | -170                    | -48                    | -123                    |
| ·OOH                               | N1 (A) | -11                     |                        | -110                    | -26                    | 15                      |
|                                    | N2 (A) | -26                     |                        | -125                    | -32                    | 6                       |
|                                    | N2 (B) | 22                      | 99                     | -77                     | 34                     | -12                     |
|                                    | O1 (B) | -9                      |                        | -108                    | 4                      | -14                     |
|                                    | O1 (C) | -32                     |                        | -131                    | -10                    | -22                     |
| ·OOCH <sub>3</sub>                 | N1 (A) | -4                      |                        | -111                    | -28                    | 24                      |
|                                    | N2 (A) | -19                     |                        | -126                    | -34                    | 15                      |
|                                    | N2 (B) | 29                      | 108                    | -78                     | 33                     | -3                      |
|                                    | O1 (B) | -2                      |                        | -110                    | 3                      | -5                      |
|                                    | O1 (C) | -25                     |                        | -132                    | -11                    | -13                     |
| ·OO-CH=CH <sub>2</sub>             | N1 (A) | -3                      |                        | -91                     | -8                     | 5                       |
|                                    | N2 (A) | -18                     |                        | -106                    | -14                    | -5                      |
|                                    | N2 (B) | 30                      | 88                     | -58                     | 53                     | -23                     |
|                                    | O1 (B) | -2                      |                        | -90                     | 23                     | -25                     |
|                                    | O1 (C) | -24                     |                        | -112                    | 9                      | -33                     |
| DPPH                               | N1 (A) | 25                      |                        | -51                     | 33                     | -7                      |
|                                    | N2 (A) | 10                      |                        | -66                     | 27                     | -17                     |
|                                    | N2 (B) | 58                      | 76                     | -18                     | 93                     | -35                     |
|                                    | O1 (B) | 27                      |                        | -49                     | 63                     | -37                     |
|                                    | O1 (C) | 4                       |                        | -72                     | 49                     | -45                     |
| O <sub>2</sub> <sup>-•</sup>       | N1 (A) | 61                      |                        | -205                    | 46                     | 15                      |
|                                    | N2 (A) | 46                      |                        | -220                    | 40                     | 6                       |
|                                    | N2 (B) | 94                      | 266                    | -172                    | 106                    | -12                     |
|                                    | O1 (B) | 63                      |                        | -203                    | 76                     | -14                     |
|                                    | O1 (C) | 40                      |                        | -226                    | 62                     | -22                     |

**Table S23.** Calculated reaction enthalpies (kJ mol<sup>-1</sup>) for the reactions of compound **p** with the selected radical species in methanol.

| <b>p</b>                           |        | HAT                     | SET-PT                 |                         | SPLET                  |                         |
|------------------------------------|--------|-------------------------|------------------------|-------------------------|------------------------|-------------------------|
| Radical                            |        | $\Delta H_{\text{BDE}}$ | $\Delta H_{\text{IP}}$ | $\Delta H_{\text{PDE}}$ | $\Delta H_{\text{PA}}$ | $\Delta H_{\text{ETE}}$ |
| ·OCH <sub>3</sub>                  | N1 (A) | -81                     |                        | -148                    | -72                    | -9                      |
|                                    | N2 (A) | -96                     |                        | -162                    | -78                    | -18                     |
|                                    | N2 (B) | -47                     | 67                     | -114                    | -13                    | -34                     |
|                                    | O1 (B) | -74                     |                        | -141                    | -35                    | -39                     |
|                                    | O3 (C) | -103                    |                        | -170                    | -55                    | -48                     |
| ·OC(CH <sub>3</sub> ) <sub>3</sub> | N1 (A) | -89                     |                        | -156                    | -81                    | -8                      |
|                                    | N2 (A) | -104                    |                        | -171                    | -87                    | -17                     |
|                                    | N2 (B) | -55                     | 67                     | -122                    | -21                    | -34                     |
|                                    | O1 (B) | -82                     |                        | -149                    | -44                    | -39                     |
|                                    | O3 (C) | -112                    |                        | -178                    | -63                    | -48                     |
| ·OH                                | N1 (A) | -153                    |                        | -140                    | -65                    | -88                     |
|                                    | N2 (A) | -167                    |                        | -155                    | -71                    | -96                     |
|                                    | N2 (B) | -119                    | -12                    | -106                    | -5                     | -113                    |
|                                    | O1 (B) | -146                    |                        | -133                    | -28                    | -118                    |
|                                    | O3 (C) | -175                    |                        | -162                    | -47                    | -127                    |
| ·OOH                               | N1 (A) | -13                     |                        | -101                    | -26                    | 14                      |
|                                    | N2 (A) | -27                     |                        | -116                    | -32                    | 5                       |
|                                    | N2 (B) | 21                      | 89                     | -67                     | 33                     | -12                     |
|                                    | O1 (B) | -6                      |                        | -95                     | 11                     | -17                     |
|                                    | O3 (C) | -35                     |                        | -124                    | -9                     | -26                     |
| ·OOCH <sub>3</sub>                 | N1 (A) | -5                      |                        | -103                    | -28                    | 22                      |
|                                    | N2 (A) | -20                     |                        | -117                    | -33                    | 14                      |
|                                    | N2 (B) | 29                      | 98                     | -69                     | 32                     | -3                      |
|                                    | O1 (B) | 2                       |                        | -96                     | 9                      | -8                      |
|                                    | O3 (C) | -27                     |                        | -125                    | -10                    | -17                     |
| ·OO-CH=CH <sub>2</sub>             | N1 (A) | -5                      |                        | -83                     | -8                     | 3                       |
|                                    | N2 (A) | -19                     |                        | -97                     | -13                    | -6                      |
|                                    | N2 (B) | 29                      | 78                     | -49                     | 52                     | -23                     |
|                                    | O1 (B) | 2                       |                        | -76                     | 29                     | -27                     |
|                                    | O3 (C) | -27                     |                        | -105                    | 10                     | -37                     |
| DPPH                               | N1 (A) | 23                      |                        | -43                     | 33                     | -9                      |
|                                    | N2 (A) | 9                       |                        | -57                     | 27                     | -18                     |
|                                    | N2 (B) | 57                      | 66                     | -9                      | 92                     | -35                     |
|                                    | O1 (B) | 30                      |                        | -36                     | 70                     | -39                     |
|                                    | O3 (C) | 1                       |                        | -65                     | 50                     | -49                     |
| O <sub>2</sub> <sup>·-</sup>       | N1 (A) | 59                      |                        | -196                    | 46                     | 14                      |
|                                    | N2 (A) | 45                      |                        | -211                    | 40                     | 5                       |
|                                    | N2 (B) | 93                      | 256                    | -162                    | 105                    | -12                     |
|                                    | O1 (B) | 66                      |                        | -189                    | 83                     | -17                     |
|                                    | O3 (C) | 37                      |                        | -218                    | 63                     | -26                     |

**Table S24.** Calculated reaction enthalpies (kJ mol<sup>-1</sup>) for the reactions of compound **q** with the selected radical species in methanol.

| <b>q</b>                           |        | HAT                     | SET-PT                 |                         | SPLET                  |                         |
|------------------------------------|--------|-------------------------|------------------------|-------------------------|------------------------|-------------------------|
| Radical                            |        | $\Delta H_{\text{BDE}}$ | $\Delta H_{\text{IP}}$ | $\Delta H_{\text{PDE}}$ | $\Delta H_{\text{PA}}$ | $\Delta H_{\text{ETE}}$ |
| ·OCH <sub>3</sub>                  | N1 (A) | -80                     |                        | -140                    | -72                    | -8                      |
|                                    | N2 (A) | -95                     |                        | -154                    | -78                    | -16                     |
|                                    | N2 (B) | -46                     | 60                     | -105                    | -12                    | -33                     |
|                                    | O1 (B) | -74                     |                        | -133                    | -33                    | -41                     |
|                                    | O3 (C) | -119                    |                        | -179                    | -55                    | -64                     |
| ·OC(CH <sub>3</sub> ) <sub>3</sub> | N1 (A) | -88                     |                        | -148                    | -81                    | -8                      |
|                                    | N2 (A) | -103                    |                        | -163                    | -87                    | -16                     |
|                                    | N2 (B) | -54                     | 60                     | -114                    | -21                    | -33                     |
|                                    | O1 (B) | -82                     |                        | -142                    | -42                    | -40                     |
|                                    | O3 (C) | -127                    |                        | -187                    | -64                    | -64                     |
| ·OH                                | N1 (A) | -151                    |                        | -132                    | -65                    | -87                     |
|                                    | N2 (A) | -166                    |                        | -147                    | -71                    | -95                     |
|                                    | N2 (B) | -117                    | -19                    | -98                     | -5                     | -112                    |
|                                    | O1 (B) | -145                    |                        | -126                    | -26                    | -120                    |
|                                    | O3 (C) | -191                    |                        | -171                    | -48                    | -143                    |
| ·OOH                               | N1 (A) | -11                     |                        | -93                     | -26                    | 14                      |
|                                    | N2 (A) | -26                     |                        | -108                    | -32                    | 6                       |
|                                    | N2 (B) | 23                      | 82                     | -59                     | 34                     | -11                     |
|                                    | O1 (B) | -5                      |                        | -87                     | 13                     | -18                     |
|                                    | O3 (C) | -51                     |                        | -133                    | -9                     | -42                     |
| ·OOCH <sub>3</sub>                 | N1 (A) | -4                      |                        | -95                     | -27                    | 23                      |
|                                    | N2 (A) | -19                     |                        | -110                    | -34                    | 15                      |
|                                    | N2 (B) | 30                      | 91                     | -61                     | 32                     | -2                      |
|                                    | O1 (B) | 2                       |                        | -89                     | 12                     | -10                     |
|                                    | O3 (C) | -43                     |                        | -134                    | -10                    | -33                     |
| ·OO-CH=CH <sub>2</sub>             | N1 (A) | -4                      |                        | -75                     | -7                     | 4                       |
|                                    | N2 (A) | -19                     |                        | -90                     | -14                    | -5                      |
|                                    | N2 (B) | 30                      | 71                     | -41                     | 52                     | -22                     |
|                                    | O1 (B) | 2                       |                        | -69                     | 32                     | -29                     |
|                                    | O3 (C) | -43                     |                        | -114                    | 10                     | -53                     |
| DPPH                               | N1 (A) | 25                      |                        | -35                     | 33                     | -8                      |
|                                    | N2 (A) | 10                      |                        | -49                     | 27                     | -17                     |
|                                    | N2 (B) | 59                      | 59                     | 0                       | 93                     | -34                     |
|                                    | O1 (B) | 31                      |                        | -28                     | 72                     | -41                     |
|                                    | O3 (C) | -15                     |                        | -74                     | 50                     | -65                     |
| O <sub>2</sub> <sup>·-</sup>       | N1 (A) | 61                      |                        | -188                    | 46                     | 14                      |
|                                    | N2 (A) | 46                      |                        | -203                    | 40                     | 6                       |
|                                    | N2 (B) | 95                      | 249                    | -154                    | 106                    | -11                     |
|                                    | O1 (B) | 67                      |                        | -182                    | 85                     | -18                     |
|                                    | O3 (C) | 21                      |                        | -227                    | 63                     | -42                     |

**Table S25.** Calculated reaction enthalpies (kJ mol<sup>-1</sup>) for the reactions of compound **r** with the selected radical species in methanol.

| <b>r</b>                           |        | HAT                     | SET-PT                 |                         | SPLET                  |                         |
|------------------------------------|--------|-------------------------|------------------------|-------------------------|------------------------|-------------------------|
| Radical                            |        | $\Delta H_{\text{BDE}}$ | $\Delta H_{\text{IP}}$ | $\Delta H_{\text{PDE}}$ | $\Delta H_{\text{PA}}$ | $\Delta H_{\text{ETE}}$ |
| ·OCH <sub>3</sub>                  | N1 (A) | -80                     |                        | -162                    | -72                    | -8                      |
|                                    | N2 (A) | -94                     |                        | -176                    | -78                    | -16                     |
|                                    | N2 (B) | -46                     | 82                     | -127                    | -13                    | -33                     |
|                                    | O1 (B) | -74                     |                        | -156                    | -36                    | -38                     |
|                                    | O2 (C) | -92                     |                        | -173                    | -65                    | -27                     |
| ·OC(CH <sub>3</sub> ) <sub>3</sub> | N1 (A) | -88                     |                        | -170                    | -81                    | -7                      |
|                                    | N2 (A) | -103                    |                        | -185                    | -87                    | -16                     |
|                                    | N2 (B) | -54                     | 82                     | -136                    | -22                    | -33                     |
|                                    | O1 (B) | -82                     |                        | -164                    | -45                    | -38                     |
|                                    | O2 (C) | -100                    |                        | -182                    | -74                    | -26                     |
| ·OH                                | N1 (A) | -152                    |                        | -154                    | -65                    | -87                     |
|                                    | N2 (A) | -166                    |                        | -168                    | -71                    | -95                     |
|                                    | N2 (B) | -117                    | 3                      | -120                    | -6                     | -112                    |
|                                    | O1 (B) | -145                    |                        | -148                    | -29                    | -117                    |
|                                    | O2 (C) | -163                    |                        | -166                    | -58                    | -106                    |
| ·OOH                               | N1 (A) | -12                     |                        | -116                    | -26                    | 15                      |
|                                    | N2 (A) | -26                     |                        | -130                    | -32                    | 6                       |
|                                    | N2 (B) | 23                      | 104                    | -81                     | 33                     | -10                     |
|                                    | O1 (B) | -5                      |                        | -109                    | 10                     | -16                     |
|                                    | O2 (C) | -23                     |                        | -127                    | -19                    | -4                      |
| ·OOCH <sub>3</sub>                 | N1 (A) | -4                      |                        | -117                    | -28                    | 23                      |
|                                    | N2 (A) | -19                     |                        | -131                    | -34                    | 15                      |
|                                    | N2 (B) | 30                      | 113                    | -83                     | 32                     | -2                      |
|                                    | O1 (B) | 2                       |                        | -111                    | 9                      | -7                      |
|                                    | O2 (C) | -16                     |                        | -129                    | -20                    | 4                       |
| ·OO-CH=CH <sub>2</sub>             | N1 (A) | -4                      |                        | -97                     | -8                     | 4                       |
|                                    | N2 (A) | -18                     |                        | -111                    | -14                    | -5                      |
|                                    | N2 (B) | 30                      | 93                     | -63                     | 52                     | -21                     |
|                                    | O1 (B) | 2                       |                        | -91                     | 29                     | -26                     |
|                                    | O2 (C) | -16                     |                        | -109                    | 0                      | -15                     |
| DPPH                               | N1 (A) | 24                      |                        | -57                     | 33                     | -8                      |
|                                    | N2 (A) | 10                      |                        | -71                     | 27                     | -17                     |
|                                    | N2 (B) | 59                      | 81                     | -22                     | 92                     | -33                     |
|                                    | O1 (B) | 31                      |                        | -50                     | 69                     | -38                     |
|                                    | O2 (C) | 13                      |                        | -68                     | 40                     | -27                     |
| O <sub>2</sub> <sup>·-</sup>       | N1 (A) | 60                      |                        | -210                    | 46                     | 15                      |
|                                    | N2 (A) | 46                      |                        | -224                    | 40                     | 6                       |
|                                    | N2 (B) | 95                      | 270                    | -176                    | 105                    | -10                     |
|                                    | O1 (B) | 67                      |                        | -204                    | 82                     | -16                     |
|                                    | O2 (C) | 49                      |                        | -222                    | 53                     | -4                      |

**Table S26.** Calculated reaction enthalpies (kJ mol<sup>-1</sup>) for the reactions of compound **s** with the selected radical species in methanol.

| <b>s</b>                           |        | HAT                     | SET-PT                 |                         | SPLET                  |                         |
|------------------------------------|--------|-------------------------|------------------------|-------------------------|------------------------|-------------------------|
| Radical                            |        | $\Delta H_{\text{BDE}}$ | $\Delta H_{\text{IP}}$ | $\Delta H_{\text{PDE}}$ | $\Delta H_{\text{PA}}$ | $\Delta H_{\text{ETE}}$ |
| ·OCH <sub>3</sub>                  | N1 (A) | -80                     |                        | -141                    | -73                    | -7                      |
|                                    | N2 (A) | -95                     | 62                     | -156                    | -79                    | -16                     |
|                                    | N2 (B) | -46                     |                        | -107                    | -13                    | -33                     |
|                                    | O1 (B) | -74                     |                        | -135                    | -35                    | -39                     |
| ·OC(CH <sub>3</sub> ) <sub>3</sub> | N1 (A) | -88                     |                        | -150                    | -81                    | -7                      |
|                                    | N2 (A) | -103                    | 62                     | -165                    | -87                    | -15                     |
|                                    | N2 (B) | -54                     |                        | -116                    | -21                    | -33                     |
|                                    | O1 (B) | -82                     |                        | -144                    | -44                    | -38                     |
| ·OH                                | N1 (A) | -151                    |                        | -134                    | -65                    | -86                     |
|                                    | N2 (A) | -166                    | -17                    | -149                    | -71                    | -95                     |
|                                    | N2 (B) | -117                    |                        | -100                    | -5                     | -112                    |
|                                    | O1 (B) | -145                    |                        | -128                    | -28                    | -117                    |
| ·OOH                               | N1 (A) | -11                     |                        | -95                     | -26                    | 15                      |
|                                    | N2 (A) | -26                     | 84                     | -110                    | -33                    | 7                       |
|                                    | N2 (B) | 23                      |                        | -61                     | 33                     | -11                     |
|                                    | O1 (B) | -5                      |                        | -89                     | 11                     | -16                     |
| ·OOCH <sub>3</sub>                 | N1 (A) | -4                      |                        | -97                     | -28                    | 24                      |
|                                    | N2 (A) | -19                     | 93                     | -111                    | -34                    | 15                      |
|                                    | N2 (B) | 30                      |                        | -63                     | 32                     | -2                      |
|                                    | O1 (B) | 2                       |                        | -90                     | 10                     | -7                      |
| ·OO-CH=CH <sub>2</sub>             | N1 (A) | -4                      |                        | -77                     | -8                     | 4                       |
|                                    | N2 (A) | -18                     | 73                     | -91                     | -14                    | -4                      |
|                                    | N2 (B) | 30                      |                        | -43                     | 52                     | -22                     |
|                                    | O1 (B) | 3                       |                        | -70                     | 30                     | -27                     |
| DPPH                               | N1 (A) | 25                      |                        | -36                     | 32                     | -8                      |
|                                    | N2 (A) | 10                      | 61                     | -51                     | 26                     | -16                     |
|                                    | N2 (B) | 59                      |                        | -2                      | 92                     | -34                     |
|                                    | O1 (B) | 31                      |                        | -30                     | 70                     | -39                     |
| O <sub>2</sub> <sup>·-</sup>       | N1 (A) | 61                      |                        | -190                    | 46                     | 15                      |
|                                    | N2 (A) | 46                      | 251                    | -205                    | 39                     | 7                       |
|                                    | N2 (B) | 95                      |                        | -156                    | 105                    | -11                     |
|                                    | O1 (B) | 67                      |                        | -184                    | 83                     | -16                     |



**Table S27.** Calculated reaction enthalpies (kJ mol<sup>-1</sup>) for the reactions of compound **t** with the selected radical species in methanol.

| <b>t</b>                           |        | HAT                     | SET-PT                 |                         | SPLET                  |                         |
|------------------------------------|--------|-------------------------|------------------------|-------------------------|------------------------|-------------------------|
| Radical                            |        | $\Delta H_{\text{BDE}}$ | $\Delta H_{\text{IP}}$ | $\Delta H_{\text{PDE}}$ | $\Delta H_{\text{PA}}$ | $\Delta H_{\text{ETE}}$ |
| ·OCH <sub>3</sub>                  | N1 (A) | -78                     |                        | -132                    | -76                    | -2                      |
|                                    | N2 (A) | -93                     |                        | -147                    | -82                    | -11                     |
|                                    | N2 (B) | -45                     | 55                     | -100                    | -15                    | -30                     |
|                                    | O1 (B) | -77                     |                        | -131                    | -45                    | -32                     |
|                                    | O1 (C) | -88                     |                        | -142                    | -83                    | -4                      |
| ·OC(CH <sub>3</sub> ) <sub>3</sub> | N1 (A) | -86                     |                        | -141                    | -84                    | -2                      |
|                                    | N2 (A) | -101                    |                        | -156                    | -91                    | -11                     |
|                                    | N2 (B) | -53                     | 55                     | -108                    | -23                    | -30                     |
|                                    | O1 (B) | -85                     |                        | -140                    | -54                    | -31                     |
|                                    | O1 (C) | -96                     |                        | -151                    | -92                    | -4                      |
| ·OH                                | N1 (A) | -149                    |                        | -125                    | -68                    | -81                     |
|                                    | N2 (A) | -164                    |                        | -140                    | -74                    | -90                     |
|                                    | N2 (B) | -117                    | -24                    | -92                     | -7                     | -109                    |
|                                    | O1 (B) | -148                    |                        | -124                    | -38                    | -110                    |
|                                    | O1 (C) | -159                    |                        | -135                    | -76                    | -83                     |
| ·OOH                               | N1 (A) | -9                      |                        | -86                     | -29                    | 20                      |
|                                    | N2 (A) | -24                     |                        | -101                    | -36                    | 11                      |
|                                    | N2 (B) | 23                      | 77                     | -53                     | 31                     | -8                      |
|                                    | O1 (B) | -8                      |                        | -85                     | 1                      | -9                      |
|                                    | O1 (C) | -19                     |                        | -96                     | -37                    | 18                      |
| ·OOCH <sub>3</sub>                 | N1 (A) | -2                      |                        | -88                     | -31                    | 29                      |
|                                    | N2 (A) | -17                     |                        | -103                    | -37                    | 20                      |
|                                    | N2 (B) | 31                      | 86                     | -55                     | 30                     | 1                       |
|                                    | O1 (B) | -1                      |                        | -86                     | 0                      | -1                      |
|                                    | O1 (C) | -12                     |                        | -97                     | -39                    | 27                      |
| ·OO-CH=CH <sub>2</sub>             | N1 (A) | -2                      |                        | -68                     | -11                    | 9                       |
|                                    | N2 (A) | -17                     |                        | -83                     | -17                    | 1                       |
|                                    | N2 (B) | 31                      | 66                     | -35                     | 50                     | -19                     |
|                                    | O1 (B) | 0                       |                        | -66                     | 20                     | -20                     |
|                                    | O1 (C) | -11                     |                        | -77                     | -19                    | 7                       |
| DPPH                               | N1 (A) | 27                      |                        | -27                     | 30                     | -3                      |
|                                    | N2 (A) | 12                      |                        | -42                     | 23                     | -11                     |
|                                    | N2 (B) | 59                      | 54                     | 5                       | 90                     | -31                     |
|                                    | O1 (B) | 28                      |                        | -26                     | 60                     | -32                     |
|                                    | O1 (C) | 17                      |                        | -37                     | 22                     | -5                      |
| O <sub>2</sub> <sup>-</sup>        | N1 (A) | 63                      |                        | -181                    | 43                     | 20                      |
|                                    | N2 (A) | 48                      |                        | -196                    | 36                     | 11                      |
|                                    | N2 (B) | 95                      | 244                    | -148                    | 103                    | -8                      |
|                                    | O1 (B) | 64                      |                        | -180                    | 73                     | -9                      |
|                                    | O1 (C) | 53                      |                        | -191                    | 35                     | 18                      |

**Table S28.** Calculated reaction enthalpies (kJ mol<sup>-1</sup>) for the reactions of compound **a** with the selected radical species in water.

| <b>a</b>                        |        | HAT                     |                        | SET-PT                  |                        | SPLET                   |  |
|---------------------------------|--------|-------------------------|------------------------|-------------------------|------------------------|-------------------------|--|
| Radical                         |        | $\Delta H_{\text{BDE}}$ | $\Delta H_{\text{IP}}$ | $\Delta H_{\text{PDE}}$ | $\Delta H_{\text{PA}}$ | $\Delta H_{\text{ETE}}$ |  |
| $\cdot\text{OCH}_3$             | N1 (A) | -81                     |                        | -154                    | -72                    | -9                      |  |
|                                 | N2 (A) | -95                     | 73                     | -167                    | -76                    | -19                     |  |
|                                 | N2 (B) | -46                     |                        | -119                    | -13                    | -33                     |  |
|                                 | O1 (B) | -73                     |                        | -146                    | -35                    | -38                     |  |
|                                 |        |                         |                        |                         |                        |                         |  |
| $\cdot\text{OC}(\text{CH}_3)_3$ | N1 (A) | -90                     |                        | -163                    | -81                    | -9                      |  |
|                                 | N2 (A) | -104                    | 73                     | -177                    | -85                    | -19                     |  |
|                                 | N2 (B) | -55                     |                        | -128                    | -22                    | -33                     |  |
|                                 | O1 (B) | -82                     |                        | -155                    | -45                    | -38                     |  |
|                                 |        |                         |                        |                         |                        |                         |  |
| $\cdot\text{OH}$                | N1 (A) | -151                    |                        | -144                    | -62                    | -90                     |  |
|                                 | N2 (A) | -165                    | -8                     | -157                    | -66                    | -99                     |  |
|                                 | N2 (B) | -116                    |                        | -109                    | -3                     | -113                    |  |
|                                 | O1 (B) | -143                    |                        | -135                    | -25                    | -118                    |  |
|                                 |        |                         |                        |                         |                        |                         |  |
| $\cdot\text{OOH}$               | N1 (A) | -14                     |                        | -107                    | -25                    | 11                      |  |
|                                 | N2 (A) | -27                     | 93                     | -120                    | -29                    | 2                       |  |
|                                 | N2 (B) | 21                      |                        | -72                     | 34                     | -13                     |  |
|                                 | O1 (B) | -5                      |                        | -99                     | 12                     | -17                     |  |
|                                 |        |                         |                        |                         |                        |                         |  |
| $\cdot\text{OOCH}_3$            | N1 (A) | -6                      |                        | -109                    | -27                    | 21                      |  |
|                                 | N2 (A) | -20                     | 103                    | -123                    | -31                    | 11                      |  |
|                                 | N2 (B) | 29                      |                        | -74                     | 32                     | -3                      |  |
|                                 | O1 (B) | 2                       |                        | -101                    | 9                      | -8                      |  |
|                                 |        |                         |                        |                         |                        |                         |  |
| $\cdot\text{OO-CH=CH}_2$        | N1 (A) | -6                      |                        | -87                     | -5                     | -1                      |  |
|                                 | N2 (A) | -20                     | 81                     | -101                    | -9                     | -10                     |  |
|                                 | N2 (B) | 29                      |                        | -52                     | 54                     | -25                     |  |
|                                 | O1 (B) | 2                       |                        | -79                     | 32                     | -29                     |  |
|                                 |        |                         |                        |                         |                        |                         |  |
| DPPH                            | N1 (A) | 23                      |                        | -52                     | 30                     | -7                      |  |
|                                 | N2 (A) | 9                       | 75                     | -66                     | 26                     | -16                     |  |
|                                 | N2 (B) | 58                      |                        | -17                     | 89                     | -31                     |  |
|                                 | O1 (B) | 31                      |                        | -44                     | 67                     | -35                     |  |
|                                 |        |                         |                        |                         |                        |                         |  |
| $\text{O}_2^{\cdot-}$           | N1 (A) | 57                      |                        | -190                    | 46                     | 11                      |  |
|                                 | N2 (A) | 44                      | 248                    | -204                    | 42                     | 2                       |  |
|                                 | N2 (B) | 92                      |                        | -155                    | 105                    | -13                     |  |
|                                 | O1 (B) | 66                      |                        | -182                    | 83                     | -17                     |  |
|                                 |        |                         |                        |                         |                        |                         |  |

**Table S29.** Calculated reaction enthalpies (kJ mol<sup>-1</sup>) for the reactions of compound **b** with the selected radical species in water.

| <b>b</b>                           |        | HAT                     | SET-PT                 |                         | SPLET                  |                         |
|------------------------------------|--------|-------------------------|------------------------|-------------------------|------------------------|-------------------------|
| Radical                            |        | $\Delta H_{\text{BDE}}$ | $\Delta H_{\text{IP}}$ | $\Delta H_{\text{PDE}}$ | $\Delta H_{\text{PA}}$ | $\Delta H_{\text{ETE}}$ |
| ·OCH <sub>3</sub>                  | N1 (A) | -80                     |                        | -152                    | -73                    | -7                      |
|                                    | N2 (A) | -96                     |                        | -167                    | -78                    | -18                     |
|                                    | N2 (B) | -47                     | 71                     | -118                    | -14                    | -33                     |
|                                    | O1 (B) | -77                     |                        | -148                    | -42                    | -35                     |
|                                    | O1 (C) | -81                     |                        | -152                    | -57                    | -24                     |
| ·OC(CH <sub>3</sub> ) <sub>3</sub> | N1 (A) | -89                     |                        | -161                    | -82                    | -7                      |
|                                    | N2 (A) | -105                    |                        | -176                    | -87                    | -18                     |
|                                    | N2 (B) | -56                     | 71                     | -128                    | -23                    | -33                     |
|                                    | O1 (B) | -86                     |                        | -157                    | -51                    | -35                     |
|                                    | O1 (C) | -90                     |                        | -162                    | -67                    | -23                     |
| ·OH                                | N1 (A) | -150                    |                        | -141                    | -63                    | -88                     |
|                                    | N2 (A) | -166                    |                        | -157                    | -68                    | -98                     |
|                                    | N2 (B) | -117                    | -9                     | -108                    | -4                     | -113                    |
|                                    | O1 (B) | -147                    |                        | -138                    | -32                    | -115                    |
|                                    | O1 (C) | -151                    |                        | -142                    | -47                    | -104                    |
| ·OOH                               | N1 (A) | -13                     |                        | -105                    | -26                    | 13                      |
|                                    | N2 (A) | -28                     |                        | -120                    | -31                    | 3                       |
|                                    | N2 (B) | 21                      | 92                     | -71                     | 33                     | -12                     |
|                                    | O1 (B) | -9                      |                        | -101                    | 5                      | -14                     |
|                                    | O1 (C) | -13                     |                        | -105                    | -10                    | -3                      |
| ·OOCH <sub>3</sub>                 | N1 (A) | -6                      |                        | -107                    | -28                    | 23                      |
|                                    | N2 (A) | -21                     |                        | -122                    | -33                    | 12                      |
|                                    | N2 (B) | 28                      | 101                    | -74                     | 31                     | -3                      |
|                                    | O1 (B) | -2                      |                        | -103                    | 3                      | -5                      |
|                                    | O1 (C) | -6                      |                        | -108                    | -13                    | 7                       |
| ·OO-CH=CH <sub>2</sub>             | N1 (A) | -5                      |                        | -85                     | -6                     | 1                       |
|                                    | N2 (A) | -20                     |                        | -100                    | -11                    | -10                     |
|                                    | N2 (B) | 28                      | 80                     | -51                     | 53                     | -25                     |
|                                    | O1 (B) | -2                      |                        | -81                     | 25                     | -27                     |
|                                    | O1 (C) | -6                      |                        | -85                     | 9                      | -15                     |
| DPPH                               | N1 (A) | 24                      |                        | -50                     | 29                     | -5                      |
|                                    | N2 (A) | 9                       |                        | -65                     | 24                     | -16                     |
|                                    | N2 (B) | 57                      | 74                     | -16                     | 88                     | -31                     |
|                                    | O1 (B) | 28                      |                        | -46                     | 60                     | -33                     |
|                                    | O1 (C) | 23                      |                        | -50                     | 45                     | -21                     |
| O <sub>2</sub> <sup>-</sup>        | N1 (A) | 58                      |                        | -188                    | 45                     | 13                      |
|                                    | N2 (A) | 43                      |                        | -203                    | 40                     | 3                       |
|                                    | N2 (B) | 91                      | 246                    | -155                    | 104                    | -12                     |
|                                    | O1 (B) | 62                      |                        | -184                    | 76                     | -14                     |
|                                    | O1 (C) | 57                      |                        | -189                    | 61                     | -3                      |

**Table S30.** Calculated reaction enthalpies (kJ mol<sup>-1</sup>) for the reactions of compound **c** with the selected radical species in water.

| <b>c</b>                           |        | HAT                     | SET-PT                 |                         | SPLET                  |                         |
|------------------------------------|--------|-------------------------|------------------------|-------------------------|------------------------|-------------------------|
| Radical                            |        | $\Delta H_{\text{BDE}}$ | $\Delta H_{\text{IP}}$ | $\Delta H_{\text{PDE}}$ | $\Delta H_{\text{PA}}$ | $\Delta H_{\text{ETE}}$ |
| ·OCH <sub>3</sub>                  | N1 (A) | -81                     |                        | -155                    | -72                    | -9                      |
|                                    | N2 (A) | -95                     |                        | -168                    | -77                    | -18                     |
|                                    | N2 (B) | -47                     | 73                     | -120                    | -13                    | -34                     |
|                                    | O1 (B) | -75                     |                        | -148                    | -35                    | -40                     |
|                                    | O2 (C) | -76                     |                        | -149                    | -55                    | -21                     |
| ·OC(CH <sub>3</sub> ) <sub>3</sub> | N1 (A) | -91                     |                        | -164                    | -81                    | -9                      |
|                                    | N2 (A) | -104                    |                        | -178                    | -86                    | -18                     |
|                                    | N2 (B) | -56                     | 73                     | -129                    | -22                    | -33                     |
|                                    | O1 (B) | -84                     |                        | -157                    | -44                    | -39                     |
|                                    | O2 (C) | -85                     |                        | -158                    | -65                    | -20                     |
| ·OH                                | N1 (A) | -151                    |                        | -144                    | -62                    | -89                     |
|                                    | N2 (A) | -165                    |                        | -158                    | -67                    | -99                     |
|                                    | N2 (B) | -117                    | -7                     | -110                    | -3                     | -114                    |
|                                    | O1 (B) | -145                    |                        | -138                    | -25                    | -120                    |
|                                    | O2 (C) | -146                    |                        | -139                    | -45                    | -101                    |
| ·OOH                               | N1 (A) | -14                     |                        | -108                    | -25                    | 11                      |
|                                    | N2 (A) | -28                     |                        | -121                    | -30                    | 2                       |
|                                    | N2 (B) | 21                      | 94                     | -73                     | 34                     | -13                     |
|                                    | O1 (B) | -7                      |                        | -101                    | 12                     | -19                     |
|                                    | O2 (C) | -8                      |                        | -102                    | -8                     | 0                       |
| ·OOCH <sub>3</sub>                 | N1 (A) | -7                      |                        | -110                    | -28                    | 21                      |
|                                    | N2 (A) | -20                     |                        | -124                    | -32                    | 12                      |
|                                    | N2 (B) | 28                      | 103                    | -75                     | 32                     | -3                      |
|                                    | O1 (B) | 0                       |                        | -103                    | 10                     | -9                      |
|                                    | O2 (C) | -1                      |                        | -104                    | -11                    | 10                      |
| ·OO-CH=CH <sub>2</sub>             | N1 (A) | -6                      |                        | -88                     | -5                     | -1                      |
|                                    | N2 (A) | -20                     |                        | -102                    | -10                    | -10                     |
|                                    | N2 (B) | 29                      | 82                     | -53                     | 54                     | -25                     |
|                                    | O1 (B) | 1                       |                        | -81                     | 32                     | -31                     |
|                                    | O2 (C) | -1                      |                        | -82                     | 12                     | -12                     |
| DPPH                               | N1 (A) | 23                      |                        | -53                     | 30                     | -7                      |
|                                    | N2 (A) | 9                       |                        | -67                     | 25                     | -16                     |
|                                    | N2 (B) | 58                      | 76                     | -18                     | 89                     | -31                     |
|                                    | O1 (B) | 30                      |                        | -46                     | 67                     | -37                     |
|                                    | O2 (C) | 28                      |                        | -47                     | 47                     | -18                     |
| O <sub>2</sub> <sup>·-</sup>       | N1 (A) | 57                      |                        | -191                    | 46                     | 11                      |
|                                    | N2 (A) | 43                      |                        | -205                    | 41                     | 2                       |
|                                    | N2 (B) | 92                      | 248                    | -156                    | 105                    | -13                     |
|                                    | O1 (B) | 64                      |                        | -184                    | 83                     | -19                     |
|                                    | O2 (C) | 63                      |                        | -186                    | 63                     | 0                       |

**Table S31.** Calculated reaction enthalpies (kJ mol<sup>-1</sup>) for the reactions of compound **d** with the selected radical species in water.

| <b>d</b>                           |        | HAT                     | SET-PT                 |                         | SPLET                  |                         |
|------------------------------------|--------|-------------------------|------------------------|-------------------------|------------------------|-------------------------|
| Radical                            |        | $\Delta H_{\text{BDE}}$ | $\Delta H_{\text{IP}}$ | $\Delta H_{\text{PDE}}$ | $\Delta H_{\text{PA}}$ | $\Delta H_{\text{ETE}}$ |
| ·OCH <sub>3</sub>                  | N1 (A) | -81                     |                        | -163                    | -71                    | -10                     |
|                                    | N2 (A) | -95                     |                        | -176                    | -76                    | -19                     |
|                                    | N2 (B) | -46                     | 81                     | -127                    | -13                    | -33                     |
|                                    | O1 (B) | -72                     |                        | -154                    | -35                    | -38                     |
|                                    | O4 (C) | -83                     |                        | -164                    | -54                    | -29                     |
| ·OC(CH <sub>3</sub> ) <sub>3</sub> | N1 (A) | -90                     |                        | -172                    | -81                    | -10                     |
|                                    | N2 (A) | -104                    |                        | -186                    | -85                    | -19                     |
|                                    | N2 (B) | -55                     | 81                     | -137                    | -22                    | -33                     |
|                                    | O1 (B) | -81                     |                        | -163                    | -44                    | -37                     |
|                                    | O4 (C) | -92                     |                        | -174                    | -63                    | -29                     |
| ·OH                                | N1 (A) | -151                    |                        | -152                    | -61                    | -90                     |
|                                    | N2 (A) | -165                    |                        | -166                    | -66                    | -99                     |
|                                    | N2 (B) | -116                    | 1                      | -117                    | -3                     | -113                    |
|                                    | O1 (B) | -142                    |                        | -143                    | -25                    | -118                    |
|                                    | O4 (C) | -153                    |                        | -154                    | -44                    | -109                    |
| ·OOH                               | N1 (A) | -14                     |                        | -116                    | -24                    | 11                      |
|                                    | N2 (A) | -27                     |                        | -129                    | -29                    | 1                       |
|                                    | N2 (B) | 21                      | 102                    | -80                     | 34                     | -13                     |
|                                    | O1 (B) | -5                      |                        | -107                    | 12                     | -17                     |
|                                    | O4 (C) | -15                     |                        | -117                    | -7                     | -8                      |
| ·OOCH <sub>3</sub>                 | N1 (A) | -6                      |                        | -118                    | -27                    | 20                      |
|                                    | N2 (A) | -20                     |                        | -132                    | -31                    | 11                      |
|                                    | N2 (B) | 29                      | 112                    | -83                     | 32                     | -3                      |
|                                    | O1 (B) | 3                       |                        | -109                    | 10                     | -7                      |
|                                    | O4 (C) | -8                      |                        | -120                    | -10                    | 1                       |
| ·OO-CH=CH <sub>2</sub>             | N1 (A) | -6                      |                        | -96                     | -4                     | -2                      |
|                                    | N2 (A) | -20                     |                        | -109                    | -9                     | -11                     |
|                                    | N2 (B) | 29                      | 90                     | -61                     | 54                     | -25                     |
|                                    | O1 (B) | 3                       |                        | -87                     | 32                     | -29                     |
|                                    | O4 (C) | -8                      |                        | -97                     | 13                     | -20                     |
| DPPH                               | N1 (A) | 23                      |                        | -61                     | 31                     | -8                      |
|                                    | N2 (A) | 9                       |                        | -74                     | 26                     | -17                     |
|                                    | N2 (B) | 58                      | 84                     | -25                     | 89                     | -31                     |
|                                    | O1 (B) | 32                      |                        | -52                     | 67                     | -35                     |
|                                    | O4 (C) | 21                      |                        | -62                     | 48                     | -26                     |
| O <sub>2</sub> <sup>-</sup>        | N1 (A) | 57                      |                        | -199                    | 47                     | 11                      |
|                                    | N2 (A) | 44                      |                        | -213                    | 42                     | 1                       |
|                                    | N2 (B) | 92                      | 256                    | -164                    | 105                    | -13                     |
|                                    | O1 (B) | 66                      |                        | -190                    | 83                     | -17                     |
|                                    | O4 (C) | 56                      |                        | -201                    | 64                     | -8                      |

**Table S32.** Calculated reaction enthalpies (kJ mol<sup>-1</sup>) for the reactions of compound **e** with the selected radical species in water.

| <b>e</b>                           |        | HAT                     | SET-PT                 |                         | SPLET                  |                         |
|------------------------------------|--------|-------------------------|------------------------|-------------------------|------------------------|-------------------------|
| Radical                            |        | $\Delta H_{\text{BDE}}$ | $\Delta H_{\text{IP}}$ | $\Delta H_{\text{PDE}}$ | $\Delta H_{\text{PA}}$ | $\Delta H_{\text{ETE}}$ |
| ·OCH <sub>3</sub>                  | N1 (A) | -81                     |                        | -156                    | -74                    | -7                      |
|                                    | N2 (A) | -94                     | 75                     | -169                    | -78                    | -16                     |
|                                    | N2 (B) | -46                     |                        | -121                    | -15                    | -32                     |
|                                    | O1 (B) | -73                     |                        | -148                    | -36                    | -36                     |
| ·OC(CH <sub>3</sub> ) <sub>3</sub> | N1 (A) | -90                     |                        | -165                    | -83                    | -7                      |
|                                    | N2 (A) | -103                    | 75                     | -178                    | -87                    | -16                     |
|                                    | N2 (B) | -55                     |                        | -131                    | -24                    | -31                     |
|                                    | O1 (B) | -82                     |                        | -157                    | -46                    | -36                     |
| ·OH                                | N1 (A) | -151                    |                        | -146                    | -64                    | -87                     |
|                                    | N2 (A) | -164                    | -5                     | -159                    | -68                    | -96                     |
|                                    | N2 (B) | -116                    |                        | -111                    | -4                     | -112                    |
|                                    | O1 (B) | -143                    |                        | -137                    | -26                    | -116                    |
| ·OOH                               | N1 (A) | -13                     |                        | -109                    | -27                    | 14                      |
|                                    | N2 (A) | -26                     | 96                     | -122                    | -31                    | 5                       |
|                                    | N2 (B) | 21                      |                        | -74                     | 32                     | -11                     |
|                                    | O1 (B) | -5                      |                        | -100                    | 11                     | -16                     |
| ·OOCH <sub>3</sub>                 | N1 (A) | -6                      |                        | -111                    | -29                    | 23                      |
|                                    | N2 (A) | -19                     | 105                    | -124                    | -33                    | 14                      |
|                                    | N2 (B) | 29                      |                        | -77                     | 30                     | -1                      |
|                                    | O1 (B) | 2                       |                        | -103                    | 8                      | -6                      |
| ·OO-CH=CH <sub>2</sub>             | N1 (A) | -5                      |                        | -89                     | -7                     | 1                       |
|                                    | N2 (A) | -18                     | 83                     | -102                    | -11                    | -7                      |
|                                    | N2 (B) | 29                      |                        | -54                     | 52                     | -23                     |
|                                    | O1 (B) | 3                       |                        | -81                     | 31                     | -28                     |
| DPPH                               | N1 (A) | 24                      |                        | -54                     | 28                     | -5                      |
|                                    | N2 (A) | 11                      | 77                     | -67                     | 24                     | -13                     |
|                                    | N2 (B) | 58                      |                        | -19                     | 87                     | -29                     |
|                                    | O1 (B) | 32                      |                        | -46                     | 66                     | -34                     |
| O <sub>2</sub> <sup>-</sup>        | N1 (A) | 58                      |                        | -192                    | 44                     | 14                      |
|                                    | N2 (A) | 45                      | 250                    | -205                    | 40                     | 5                       |
|                                    | N2 (B) | 92                      |                        | -158                    | 103                    | -11                     |
|                                    | O1 (B) | 66                      |                        | -184                    | 82                     | -16                     |

**Table S33.** Calculated reaction enthalpies (kJ mol<sup>-1</sup>) for the reactions of compound **f** with the selected radical species in water.

| <b>f</b>                           |        | HAT                     | SET-PT                 |                         | SPLET                  |                         |
|------------------------------------|--------|-------------------------|------------------------|-------------------------|------------------------|-------------------------|
| Radical                            |        | $\Delta H_{\text{BDE}}$ | $\Delta H_{\text{IP}}$ | $\Delta H_{\text{PDE}}$ | $\Delta H_{\text{PA}}$ | $\Delta H_{\text{ETE}}$ |
| ·OCH <sub>3</sub>                  | N1 (A) | -81                     |                        | -155                    | -75                    | -5                      |
|                                    | N2 (A) | -94                     | 75                     | -169                    | -77                    | -17                     |
|                                    | N2 (B) | -46                     |                        | -120                    | -17                    | -29                     |
|                                    | O1 (B) | -72                     |                        | -147                    | -36                    | -36                     |
| ·OC(CH <sub>3</sub> ) <sub>3</sub> | N1 (A) | -90                     |                        | -165                    | -85                    | -5                      |
|                                    | N2 (A) | -103                    | 75                     | -178                    | -86                    | -16                     |
|                                    | N2 (B) | -55                     |                        | -130                    | -26                    | -29                     |
|                                    | O1 (B) | -81                     |                        | -156                    | -45                    | -36                     |
| ·OH                                | N1 (A) | -151                    |                        | -145                    | -65                    | -86                     |
|                                    | N2 (A) | -164                    | -5                     | -158                    | -67                    | -97                     |
|                                    | N2 (B) | -116                    |                        | -110                    | -7                     | -109                    |
|                                    | O1 (B) | -142                    |                        | -137                    | -26                    | -116                    |
| ·OOH                               | N1 (A) | -13                     |                        | -108                    | -28                    | 15                      |
|                                    | N2 (A) | -26                     | 95                     | -122                    | -30                    | 4                       |
|                                    | N2 (B) | 22                      |                        | -73                     | 30                     | -8                      |
|                                    | O1 (B) | -4                      |                        | -100                    | 11                     | -15                     |
| ·OOCH <sub>3</sub>                 | N1 (A) | -6                      |                        | -111                    | -31                    | 25                      |
|                                    | N2 (A) | -19                     | 105                    | -124                    | -32                    | 14                      |
|                                    | N2 (B) | 29                      |                        | -76                     | 28                     | 2                       |
|                                    | O1 (B) | 3                       |                        | -102                    | 8                      | -6                      |
| ·OO-CH=CH <sub>2</sub>             | N1 (A) | -5                      |                        | -88                     | -8                     | 3                       |
|                                    | N2 (A) | -18                     | 83                     | -102                    | -10                    | -8                      |
|                                    | N2 (B) | 30                      |                        | -54                     | 50                     | -20                     |
|                                    | O1 (B) | 3                       |                        | -80                     | 31                     | -28                     |
| DPPH                               | N1 (A) | 24                      |                        | -53                     | 27                     | -3                      |
|                                    | N2 (A) | 11                      | 77                     | -67                     | 25                     | -14                     |
|                                    | N2 (B) | 59                      |                        | -19                     | 85                     | -26                     |
|                                    | O1 (B) | 32                      |                        | -45                     | 66                     | -34                     |
| O <sub>2</sub> <sup>-</sup>        | N1 (A) | 58                      |                        | -192                    | 43                     | 15                      |
|                                    | N2 (A) | 45                      | 250                    | -205                    | 41                     | 4                       |
|                                    | N2 (B) | 93                      |                        | -157                    | 101                    | -8                      |
|                                    | O1 (B) | 66                      |                        | -183                    | 82                     | -15                     |

**Table S34.** Calculated reaction enthalpies (kJ mol<sup>-1</sup>) for the reactions of compound **g** with the selected radical species in water.

| <b>g</b>                           |        | HAT                     | SET-PT                 |                         | SPLET                  |                         |
|------------------------------------|--------|-------------------------|------------------------|-------------------------|------------------------|-------------------------|
| Radical                            |        | $\Delta H_{\text{BDE}}$ | $\Delta H_{\text{IP}}$ | $\Delta H_{\text{PDE}}$ | $\Delta H_{\text{PA}}$ | $\Delta H_{\text{ETE}}$ |
| ·OCH <sub>3</sub>                  | N1 (A) | -81                     |                        | -155                    | -75                    | -6                      |
|                                    | N2 (A) | -94                     | 74                     | -168                    | -77                    | -17                     |
|                                    | N2 (B) | -46                     |                        | -120                    | -14                    | -32                     |
|                                    | O1 (B) | -75                     |                        | -149                    | -36                    | -39                     |
| ·OC(CH <sub>3</sub> ) <sub>3</sub> | N1 (A) | -90                     |                        |                         | -164                   | -84                     |
|                                    | N2 (A) | -103                    | 74                     | -178                    | -86                    | -17                     |
|                                    | N2 (B) | -55                     |                        | -129                    | -23                    | -32                     |
|                                    | O1 (B) | -84                     |                        | -158                    | -45                    | -39                     |
| ·OH                                | N1 (A) | -151                    |                        |                         | -145                   | -65                     |
|                                    | N2 (A) | -164                    | -6                     | -158                    | -67                    | -98                     |
|                                    | N2 (B) | -116                    |                        | -110                    | -4                     | -112                    |
|                                    | O1 (B) | -145                    |                        | -139                    | -26                    | -119                    |
| ·OOH                               | N1 (A) | -13                     |                        |                         | -108                   | -28                     |
|                                    | N2 (A) | -27                     | 95                     | -121                    | -30                    | 3                       |
|                                    | N2 (B) | 22                      |                        | -73                     | 33                     | -11                     |
|                                    | O1 (B) | -7                      |                        | -102                    | 11                     | -18                     |
| ·OOCH <sub>3</sub>                 | N1 (A) | -6                      |                        |                         | -110                   | -30                     |
|                                    | N2 (A) | -19                     | 104                    | -124                    | -32                    | 13                      |
|                                    | N2 (B) | 29                      |                        | -75                     | 31                     | -2                      |
|                                    | O1 (B) | 0                       |                        | -104                    | 9                      | -9                      |
| ·OO-CH=CH <sub>2</sub>             | N1 (A) | -6                      |                        |                         | -88                    | -8                      |
|                                    | N2 (A) | -19                     | 83                     | -101                    | -10                    | -9                      |
|                                    | N2 (B) | 29                      |                        | -53                     | 53                     | -23                     |
|                                    | O1 (B) | 0                       |                        | -82                     | 31                     | -30                     |
| DPPH                               | N1 (A) | 24                      |                        |                         | -53                    | 27                      |
|                                    | N2 (A) | 10                      | 77                     | -66                     | 25                     | -15                     |
|                                    | N2 (B) | 58                      |                        | -18                     | 88                     | -29                     |
|                                    | O1 (B) | 30                      |                        | -47                     | 66                     | -37                     |
| O <sub>2</sub> <sup>-</sup>        | N1 (A) | 58                      |                        |                         | -191                   | 43                      |
|                                    | N2 (A) | 44                      | 249                    | -205                    | 41                     | 3                       |
|                                    | N2 (B) | 93                      |                        | -156                    | 104                    | -11                     |
|                                    | O1 (B) | 64                      |                        | -185                    | 82                     | -18                     |



**Table S35.** Calculated reaction enthalpies (kJ mol<sup>-1</sup>) for the reactions of compound **h** with the selected radical species in water.

| <b>h</b>                           |        | HAT                     | SET-PT                 |                         | SPLET                  |                         |
|------------------------------------|--------|-------------------------|------------------------|-------------------------|------------------------|-------------------------|
| Radical                            |        | $\Delta H_{\text{BDE}}$ | $\Delta H_{\text{IP}}$ | $\Delta H_{\text{PDE}}$ | $\Delta H_{\text{PA}}$ | $\Delta H_{\text{ETE}}$ |
| ·OCH <sub>3</sub>                  | N1 (A) | -76                     |                        | -156                    | -75                    | -2                      |
|                                    | N2 (A) | -89                     | 79                     | -168                    | -80                    | -9                      |
|                                    | N2 (B) | -42                     |                        | -121                    | -15                    | -27                     |
|                                    | O1 (B) | -73                     |                        | -152                    | -42                    | -31                     |
| ·OC(CH <sub>3</sub> ) <sub>3</sub> | N1 (A) | -85                     |                        | -165                    | -84                    | -1                      |
|                                    | N2 (A) | -98                     | 80                     | -177                    | -89                    | -8                      |
|                                    | N2 (B) | -51                     |                        | -130                    | -24                    | -27                     |
|                                    | O1 (B) | -82                     |                        | -162                    | -51                    | -31                     |
| ·OH                                | N1 (A) | -146                    |                        | -145                    | -65                    | -82                     |
|                                    | N2 (A) | -159                    | -1                     | -158                    | -70                    | -89                     |
|                                    | N2 (B) | -112                    |                        | -111                    | -4                     | -107                    |
|                                    | O1 (B) | -143                    |                        | -142                    | -32                    | -111                    |
| ·OOH                               | N1 (A) | -9                      |                        | -109                    | -28                    | 19                      |
|                                    | N2 (A) | -21                     | 100                    | -121                    | -33                    | 12                      |
|                                    | N2 (B) | 26                      |                        | -74                     | 32                     | -7                      |
|                                    | O1 (B) | -5                      |                        | -105                    | 5                      | -11                     |
| ·OOCH <sub>3</sub>                 | N1 (A) | -1                      |                        | -111                    | -30                    | 29                      |
|                                    | N2 (A) | -14                     | 110                    | -123                    | -35                    | 22                      |
|                                    | N2 (B) | 33                      |                        | -76                     | 30                     | 3                       |
|                                    | O1 (B) | 2                       |                        | -108                    | 3                      | -1                      |
| ·OO-CH=CH <sub>2</sub>             | N1 (A) | -1                      |                        | -89                     | -8                     | 7                       |
|                                    | N2 (A) | -13                     | 88                     | -101                    | -13                    | 0                       |
|                                    | N2 (B) | 34                      |                        | -54                     | 52                     | -19                     |
|                                    | O1 (B) | 2                       |                        | -86                     | 25                     | -23                     |
| DPPH                               | N1 (A) | 28                      |                        | -54                     | 27                     | 1                       |
|                                    | N2 (A) | 16                      | 82                     | -66                     | 22                     | -6                      |
|                                    | N2 (B) | 63                      |                        | -19                     | 87                     | -25                     |
|                                    | O1 (B) | 31                      |                        | -51                     | 60                     | -29                     |
| O <sub>2</sub> <sup>-</sup>        | N1 (A) | 62                      |                        | -192                    | 43                     | 19                      |
|                                    | N2 (A) | 50                      | 254                    | -204                    | 38                     | 12                      |
|                                    | N2 (B) | 97                      |                        | -158                    | 103                    | -7                      |
|                                    | O1 (B) | 65                      |                        | -189                    | 76                     | -11                     |

**Table S36.** Calculated reaction enthalpies (kJ mol<sup>-1</sup>) for the reactions of compound **i** with the selected radical species in water.

| <b>i</b>                           |        | HAT                     | SET-PT                 |                         | SPLET                  |                         |
|------------------------------------|--------|-------------------------|------------------------|-------------------------|------------------------|-------------------------|
| Radical                            |        | $\Delta H_{\text{BDE}}$ | $\Delta H_{\text{IP}}$ | $\Delta H_{\text{PDE}}$ | $\Delta H_{\text{PA}}$ | $\Delta H_{\text{ETE}}$ |
| ·OCH <sub>3</sub>                  | N1 (A) | -80                     |                        | -157                    | -74                    | -5                      |
|                                    | N2 (A) | -93                     | 77                     | -170                    | -79                    | -14                     |
|                                    | N2 (B) | -45                     |                        | -123                    | -15                    | -30                     |
|                                    | O1 (B) | -71                     |                        | -148                    | -37                    | -34                     |
| ·OC(CH <sub>3</sub> ) <sub>3</sub> | N1 (A) | -89                     |                        | -166                    | -84                    | -5                      |
|                                    | N2 (A) | -102                    | 77                     | -179                    | -88                    | -14                     |
|                                    | N2 (B) | -55                     |                        | -132                    | -25                    | -30                     |
|                                    | O1 (B) | -80                     |                        | -157                    | -47                    | -34                     |
| ·OH                                | N1 (A) | -150                    |                        | -147                    | -64                    | -85                     |
|                                    | N2 (A) | -163                    | -3                     | -160                    | -69                    | -94                     |
|                                    | N2 (B) | -115                    |                        | -112                    | -5                     | -110                    |
|                                    | O1 (B) | -141                    |                        | -138                    | -27                    | -114                    |
| ·OOH                               | N1 (A) | -12                     |                        | -110                    | -27                    | 15                      |
|                                    | N2 (A) | -25                     | 98                     | -123                    | -32                    | 7                       |
|                                    | N2 (B) | 22                      |                        | -75                     | 32                     | -10                     |
|                                    | O1 (B) | -3                      |                        | -101                    | 10                     | -13                     |
| ·OOCH <sub>3</sub>                 | N1 (A) | -5                      |                        | -112                    | -30                    | 25                      |
|                                    | N2 (A) | -18                     | 107                    | -125                    | -34                    | 16                      |
|                                    | N2 (B) | 29                      |                        | -78                     | 29                     | 0                       |
|                                    | O1 (B) | 4                       |                        | -104                    | 7                      | -3                      |
| ·OO-CH=CH <sub>2</sub>             | N1 (A) | -4                      |                        | -90                     | -8                     | 3                       |
|                                    | N2 (A) | -17                     | 86                     | -103                    | -12                    | -5                      |
|                                    | N2 (B) | 30                      |                        | -56                     | 52                     | -22                     |
|                                    | O1 (B) | 4                       |                        | -81                     | 30                     | -25                     |
| DPPH                               | N1 (A) | 25                      |                        | -55                     | 27                     | -3                      |
|                                    | N2 (A) | 12                      | 79                     | -68                     | 23                     | -11                     |
|                                    | N2 (B) | 59                      |                        | -21                     | 87                     | -28                     |
|                                    | O1 (B) | 33                      |                        | -46                     | 65                     | -31                     |
| O <sub>2</sub> <sup>-</sup>        | N1 (A) | 59                      |                        | -193                    | 44                     | 15                      |
|                                    | N2 (A) | 46                      | 252                    | -206                    | 39                     | 7                       |
|                                    | N2 (B) | 93                      |                        | -159                    | 103                    | -10                     |
|                                    | O1 (B) | 68                      |                        | -185                    | 81                     | -13                     |

**Table S37.** Calculated reaction enthalpies (kJ mol<sup>-1</sup>) for the reactions of compound **j** with the selected radical species in water.

| <b>j</b>                           |        | HAT                     | SET-PT                 |                         | SPLET                  |                         |
|------------------------------------|--------|-------------------------|------------------------|-------------------------|------------------------|-------------------------|
| Radical                            |        | $\Delta H_{\text{BDE}}$ | $\Delta H_{\text{IP}}$ | $\Delta H_{\text{PDE}}$ | $\Delta H_{\text{PA}}$ | $\Delta H_{\text{ETE}}$ |
| ·OCH <sub>3</sub>                  | N1 (A) | -80                     |                        | -158                    | -75                    | -5                      |
|                                    | N2 (A) | -92                     | 78                     | -171                    | -79                    | -13                     |
|                                    | N2 (B) | -44                     |                        | -123                    | -16                    | -28                     |
|                                    | O1 (B) | -72                     |                        | -150                    | -39                    | -33                     |
| ·OC(CH <sub>3</sub> ) <sub>3</sub> | N1 (A) | -89                     |                        | -167                    | -84                    | -5                      |
|                                    | N2 (A) | -101                    | 79                     | -180                    | -88                    | -13                     |
|                                    | N2 (B) | -53                     |                        | -132                    | -25                    | -28                     |
|                                    | O1 (B) | -81                     |                        | -159                    | -49                    | -32                     |
| ·OH                                | N1 (A) | -150                    |                        | -148                    | -65                    | -85                     |
|                                    | N2 (A) | -162                    | -2                     | -160                    | -69                    | -93                     |
|                                    | N2 (B) | -114                    |                        | -113                    | -6                     | -108                    |
|                                    | O1 (B) | -142                    |                        | -140                    | -29                    | -113                    |
| ·OOH                               | N1 (A) | -12                     |                        | -111                    | -28                    | 16                      |
|                                    | N2 (A) | -25                     | 99                     | -124                    | -32                    | 7                       |
|                                    | N2 (B) | 23                      |                        | -76                     | 31                     | -8                      |
|                                    | O1 (B) | -4                      |                        | -103                    | 8                      | -12                     |
| ·OOCH <sub>3</sub>                 | N1 (A) | -5                      |                        | -113                    | -30                    | 25                      |
|                                    | N2 (A) | -17                     | 109                    | -126                    | -34                    | 17                      |
|                                    | N2 (B) | 31                      |                        | -78                     | 28                     | 2                       |
|                                    | O1 (B) | 3                       |                        | -106                    | 5                      | -2                      |
| ·OO-CH=CH <sub>2</sub>             | N1 (A) | -4                      |                        | -91                     | -8                     | 4                       |
|                                    | N2 (A) | -17                     | 87                     | -104                    | -12                    | -5                      |
|                                    | N2 (B) | 31                      |                        | -56                     | 51                     | -20                     |
|                                    | O1 (B) | 4                       |                        | -83                     | 28                     | -24                     |
| DPPH                               | N1 (A) | 25                      |                        | -56                     | 27                     | -2                      |
|                                    | N2 (A) | 12                      | 81                     | -69                     | 23                     | -11                     |
|                                    | N2 (B) | 60                      |                        | -21                     | 86                     | -26                     |
|                                    | O1 (B) | 33                      |                        | -48                     | 63                     | -30                     |
| O <sub>2</sub> <sup>-</sup>        | N1 (A) | 59                      |                        | -194                    | 43                     | 16                      |
|                                    | N2 (A) | 46                      | 253                    | -207                    | 39                     | 7                       |
|                                    | N2 (B) | 94                      |                        | -159                    | 102                    | -8                      |
|                                    | O1 (B) | 67                      |                        | -187                    | 79                     | -12                     |

**Table S38.** Calculated reaction enthalpies (kJ mol<sup>-1</sup>) for the reactions of compound **k** with the selected radical species in water.

| <b>k</b>                           |        | HAT                     | SET-PT                 |                         | SPLET                  |                         |
|------------------------------------|--------|-------------------------|------------------------|-------------------------|------------------------|-------------------------|
| Radical                            |        | $\Delta H_{\text{BDE}}$ | $\Delta H_{\text{IP}}$ | $\Delta H_{\text{PDE}}$ | $\Delta H_{\text{PA}}$ | $\Delta H_{\text{ETE}}$ |
| ·OCH <sub>3</sub>                  | N1 (A) | -79                     |                        | -154                    | -69                    | -10                     |
|                                    | N2 (A) | -92                     | 75                     | -166                    | -74                    | -18                     |
|                                    | N2 (B) | -42                     |                        | -116                    | -12                    | -30                     |
|                                    | O1 (B) | -75                     |                        | -150                    | -37                    | -39                     |
| ·OC(CH <sub>3</sub> ) <sub>3</sub> | N1 (A) | -88                     |                        | -163                    | -79                    | -9                      |
|                                    | N2 (A) | -101                    | 75                     | -175                    | -83                    | -17                     |
|                                    | N2 (B) | -51                     |                        | -125                    | -21                    | -30                     |
|                                    | O1 (B) | -84                     |                        | -159                    | -46                    | -38                     |
| ·OH                                | N1 (A) | -149                    |                        | -143                    | -59                    | -90                     |
|                                    | N2 (A) | -162                    | -6                     | -156                    | -64                    | -98                     |
|                                    | N2 (B) | -112                    |                        | -106                    | -1                     | -110                    |
|                                    | O1 (B) | -145                    |                        | -140                    | -27                    | -119                    |
| ·OOH                               | N1 (A) | -11                     |                        | -106                    | -22                    | 11                      |
|                                    | N2 (A) | -24                     | 95                     | -119                    | -27                    | 3                       |
|                                    | N2 (B) | 26                      |                        | -69                     | 36                     | -9                      |
|                                    | O1 (B) | -8                      |                        | -103                    | 10                     | -18                     |
| ·OOCH <sub>3</sub>                 | N1 (A) | -4                      |                        | -109                    | -25                    | 21                      |
|                                    | N2 (A) | -17                     | 105                    | -122                    | -29                    | 13                      |
|                                    | N2 (B) | 33                      |                        | -72                     | 33                     | 0                       |
|                                    | O1 (B) | 0                       |                        | -105                    | 8                      | -8                      |
| ·OO-CH=CH <sub>2</sub>             | N1 (A) | -4                      |                        | -87                     | -2                     | -1                      |
|                                    | N2 (A) | -16                     | 83                     | -99                     | -7                     | -9                      |
|                                    | N2 (B) | 34                      |                        | -49                     | 55                     | -22                     |
|                                    | O1 (B) | 0                       |                        | -83                     | 30                     | -30                     |
| DPPH                               | N1 (A) | 25                      |                        | -52                     | 33                     | -7                      |
|                                    | N2 (A) | 13                      | 77                     | -64                     | 28                     | -15                     |
|                                    | N2 (B) | 63                      |                        | -14                     | 90                     | -28                     |
|                                    | O1 (B) | 29                      |                        | -48                     | 65                     | -36                     |
| O <sub>2</sub> <sup>-</sup>        | N1 (A) | 60                      |                        | -190                    | 49                     | 11                      |
|                                    | N2 (A) | 47                      | 250                    | -203                    | 44                     | 3                       |
|                                    | N2 (B) | 97                      |                        | -153                    | 107                    | -9                      |
|                                    | O1 (B) | 63                      |                        | -186                    | 81                     | -18                     |

**Table S39.** Calculated reaction enthalpies (kJ mol<sup>-1</sup>) for the reactions of compound **I** with the selected radical species in water.

| I                               |        | HAT                     |                        | SET-PT                  |                        | SPLET                   |  |
|---------------------------------|--------|-------------------------|------------------------|-------------------------|------------------------|-------------------------|--|
| Radical                         |        | $\Delta H_{\text{BDE}}$ | $\Delta H_{\text{IP}}$ | $\Delta H_{\text{PDE}}$ | $\Delta H_{\text{PA}}$ | $\Delta H_{\text{ETE}}$ |  |
| $\cdot\text{OCH}_3$             | N1 (A) | -79                     |                        | -153                    | -69                    | -10                     |  |
|                                 | N2 (A) | -93                     | 74                     | -168                    | -74                    | -19                     |  |
|                                 | N2 (B) | -44                     |                        | -119                    | -10                    | -34                     |  |
|                                 | O1 (B) | -70                     |                        | -144                    | -32                    | -38                     |  |
|                                 |        |                         |                        |                         |                        |                         |  |
| $\cdot\text{OC}(\text{CH}_3)_3$ | N1 (A) | -88                     |                        | -162                    | -79                    | -9                      |  |
|                                 | N2 (A) | -102                    | 75                     | -177                    | -83                    | -19                     |  |
|                                 | N2 (B) | -53                     |                        | -128                    | -20                    | -34                     |  |
|                                 | O1 (B) | -79                     |                        | -154                    | -42                    | -37                     |  |
|                                 |        |                         |                        |                         |                        |                         |  |
| $\cdot\text{OH}$                | N1 (A) | -149                    |                        | -143                    | -59                    | -90                     |  |
|                                 | N2 (A) | -163                    | -6                     | -157                    | -64                    | -100                    |  |
|                                 | N2 (B) | -114                    |                        | -108                    | 0                      | -114                    |  |
|                                 | O1 (B) | -140                    |                        | -134                    | -22                    | -118                    |  |
|                                 |        |                         |                        |                         |                        |                         |  |
| $\cdot\text{OOH}$               | N1 (A) | -11                     |                        | -106                    | -22                    | 11                      |  |
|                                 | N2 (A) | -26                     | 95                     | -120                    | -27                    | 1                       |  |
|                                 | N2 (B) | 23                      |                        | -72                     | 37                     | -13                     |  |
|                                 | O1 (B) | -2                      |                        | -97                     | 15                     | -17                     |  |
|                                 |        |                         |                        |                         |                        |                         |  |
| $\cdot\text{OOCH}_3$            | N1 (A) | -4                      |                        | -109                    | -25                    | 21                      |  |
|                                 | N2 (A) | -18                     | 105                    | -123                    | -29                    | 11                      |  |
|                                 | N2 (B) | 31                      |                        | -74                     | 34                     | -4                      |  |
|                                 | O1 (B) | 5                       |                        | -100                    | 12                     | -7                      |  |
|                                 |        |                         |                        |                         |                        |                         |  |
| $\cdot\text{OO-CH=CH}_2$        | N1 (A) | -4                      |                        | -86                     | -2                     | -1                      |  |
|                                 | N2 (A) | -18                     | 83                     | -101                    | -7                     | -11                     |  |
|                                 | N2 (B) | 31                      |                        | -52                     | 56                     | -26                     |  |
|                                 | O1 (B) | 5                       |                        | -77                     | 35                     | -29                     |  |
|                                 |        |                         |                        |                         |                        |                         |  |
| DPPH                            | N1 (A) | 25                      |                        | -51                     | 33                     | -7                      |  |
|                                 | N2 (A) | 11                      | 77                     | -66                     | 28                     | -17                     |  |
|                                 | N2 (B) | 60                      |                        | -17                     | 92                     | -32                     |  |
|                                 | O1 (B) | 34                      |                        | -42                     | 70                     | -35                     |  |
|                                 |        |                         |                        |                         |                        |                         |  |
| $\text{O}_2^{\cdot-}$           | N1 (A) | 60                      |                        | -190                    | 49                     | 11                      |  |
|                                 | N2 (A) | 45                      | 249                    | -204                    | 44                     | 1                       |  |
|                                 | N2 (B) | 94                      |                        | -155                    | 108                    | -13                     |  |
|                                 | O1 (B) | 69                      |                        | -181                    | 86                     | -17                     |  |
|                                 |        |                         |                        |                         |                        |                         |  |

**Table S40.** Calculated reaction enthalpies (kJ mol<sup>-1</sup>) for the reactions of compound **m** with the selected radical species in water.

| <b>m</b>                           |        | HAT                     | SET-PT                 |                         | SPLET                  |                         |
|------------------------------------|--------|-------------------------|------------------------|-------------------------|------------------------|-------------------------|
| Radical                            |        | $\Delta H_{\text{BDE}}$ | $\Delta H_{\text{IP}}$ | $\Delta H_{\text{PDE}}$ | $\Delta H_{\text{PA}}$ | $\Delta H_{\text{ETE}}$ |
| ·OCH <sub>3</sub>                  | N1 (A) | -80                     | 76                     | -156                    | -72                    | -8                      |
|                                    | N2 (A) | -93                     |                        | -169                    | -77                    | -15                     |
|                                    | N2 (B) | -46                     |                        | -122                    | -13                    | -32                     |
|                                    | O1 (B) | -78                     |                        | -154                    | -38                    | -39                     |
|                                    | O1 (C) | -108                    |                        | -185                    | -73                    | -35                     |
|                                    | O2 (C) | -104                    |                        | -181                    | -72                    | -32                     |
| ·OC(CH <sub>3</sub> ) <sub>3</sub> | N1 (A) | -89                     | 77                     | -166                    | -81                    | -8                      |
|                                    | N2 (A) | -102                    |                        | -179                    | -87                    | -15                     |
|                                    | N2 (B) | -55                     |                        | -132                    | -23                    | -32                     |
|                                    | O1 (B) | -87                     |                        | -163                    | -47                    | -39                     |
|                                    | O1 (C) | -117                    |                        | -194                    | -82                    | -35                     |
|                                    | O2 (C) | -113                    |                        | -190                    | -81                    | -32                     |
| ·OH                                | N1 (A) | -150                    | -4                     | -146                    | -61                    | -88                     |
|                                    | N2 (A) | -163                    |                        | -159                    | -67                    | -96                     |
|                                    | N2 (B) | -116                    |                        | -112                    | -3                     | -113                    |
|                                    | O1 (B) | -148                    |                        | -144                    | -28                    | -120                    |
|                                    | O1 (C) | -178                    |                        | -174                    | -62                    | -116                    |
|                                    | O2 (C) | -174                    |                        | -170                    | -62                    | -112                    |
| ·OOH                               | N1 (A) | -12                     | 97                     | -109                    | -25                    | 12                      |
|                                    | N2 (A) | -25                     |                        | -122                    | -30                    | 5                       |
|                                    | N2 (B) | 22                      |                        | -75                     | 34                     | -12                     |
|                                    | O1 (B) | -10                     |                        | -107                    | 9                      | -19                     |
|                                    | O1 (C) | -40                     |                        | -137                    | -26                    | -15                     |
|                                    | O2 (C) | -36                     |                        | -133                    | -25                    | -11                     |
| ·OOCH <sub>3</sub>                 | N1 (A) | -5                      | 107                    | -112                    | -27                    | 22                      |
|                                    | N2 (A) | -18                     |                        | -125                    | -33                    | 15                      |
|                                    | N2 (B) | 29                      |                        | -78                     | 31                     | -2                      |
|                                    | O1 (B) | -3                      |                        | -109                    | 6                      | -9                      |
|                                    | O1 (C) | -33                     |                        | -140                    | -28                    | -5                      |
|                                    | O2 (C) | -29                     |                        | -136                    | -27                    | -2                      |
| ·OO-CH=CH <sub>2</sub>             | N1 (A) | -5                      | 85                     | -89                     | -5                     | 0                       |
|                                    | N2 (A) | -17                     |                        | -102                    | -11                    | -7                      |
|                                    | N2 (B) | 30                      |                        | -55                     | 53                     | -24                     |
|                                    | O1 (B) | -2                      |                        | -87                     | 29                     | -31                     |
|                                    | O1 (C) | -33                     |                        | -118                    | -6                     | -27                     |
|                                    | O2 (C) | -29                     |                        | -114                    | -5                     | -24                     |
| DPPH                               | N1 (A) | 24                      | 79                     | -54                     | 30                     | -6                      |
|                                    | N2 (A) | 12                      |                        | -67                     | 24                     | -13                     |
|                                    | N2 (B) | 59                      |                        | -20                     | 89                     | -30                     |
|                                    | O1 (B) | 27                      |                        | -52                     | 64                     | -37                     |
|                                    | O1 (C) | -4                      |                        | -83                     | 29                     | -33                     |
|                                    | O2 (C) | 0                       |                        | -79                     | 30                     | -30                     |
| O <sub>2</sub> <sup>-</sup>        | N1 (A) | 59                      | 251                    | -193                    | 46                     | 12                      |
|                                    | N2 (A) | 46                      |                        | -206                    | 41                     | 5                       |
|                                    | N2 (B) | 93                      |                        | -159                    | 105                    | -12                     |
|                                    | O1 (B) | 61                      |                        | -191                    | 80                     | -19                     |
|                                    | O1 (C) | 31                      |                        | -221                    | 45                     | -15                     |
|                                    | O2 (C) | 34                      |                        | -217                    | 46                     | -11                     |

**Table S41.** Calculated reaction enthalpies (kJ mol<sup>-1</sup>) for the reactions of compound **n** with the selected radical species in water.

| <b>n</b>                           |        | HAT                     | SET-PT                 |                         | SPLET                  |                         |
|------------------------------------|--------|-------------------------|------------------------|-------------------------|------------------------|-------------------------|
| Radical                            |        | $\Delta H_{\text{BDE}}$ | $\Delta H_{\text{IP}}$ | $\Delta H_{\text{PDE}}$ | $\Delta H_{\text{PA}}$ | $\Delta H_{\text{ETE}}$ |
| ·OCH <sub>3</sub>                  | N1 (A) | -81                     | 66                     | -147                    | -72                    | -9                      |
|                                    | N2 (A) | -95                     |                        | -161                    | -76                    | -18                     |
|                                    | N2 (B) | -47                     |                        | -113                    | -13                    | -34                     |
|                                    | O1 (B) | -73                     |                        | -139                    | -35                    | -38                     |
|                                    | O2 (C) | -109                    |                        | -175                    | -70                    | -38                     |
|                                    | O3 (C) | -109                    |                        | -175                    | -70                    | -39                     |
| ·OC(CH <sub>3</sub> ) <sub>3</sub> | N1 (A) | -90                     | 67                     | -157                    | -81                    | -9                      |
|                                    | N2 (A) | -104                    |                        | -170                    | -86                    | -18                     |
|                                    | N2 (B) | -56                     |                        | -123                    | -22                    | -33                     |
|                                    | O1 (B) | -82                     |                        | -148                    | -44                    | -38                     |
|                                    | O2 (C) | -118                    |                        | -184                    | -80                    | -38                     |
|                                    | O3 (C) | -118                    |                        | -185                    | -79                    | -39                     |
| ·OH                                | N1 (A) | -151                    | -14                    | -137                    | -62                    | -89                     |
|                                    | N2 (A) | -165                    |                        | -151                    | -66                    | -98                     |
|                                    | N2 (B) | -117                    |                        | -103                    | -3                     | -114                    |
|                                    | O1 (B) | -143                    |                        | -129                    | -24                    | -118                    |
|                                    | O2 (C) | -179                    |                        | -165                    | -60                    | -118                    |
|                                    | O3 (C) | -179                    |                        | -165                    | -59                    | -119                    |
| ·OOH                               | N1 (A) | -13                     | 87                     | -100                    | -25                    | 11                      |
|                                    | N2 (A) | -27                     |                        | -114                    | -29                    | 2                       |
|                                    | N2 (B) | 21                      |                        | -66                     | 34                     | -13                     |
|                                    | O1 (B) | -5                      |                        | -92                     | 12                     | -17                     |
|                                    | O2 (C) | -41                     |                        | -128                    | -23                    | -18                     |
|                                    | O3 (C) | -41                     |                        | -128                    | -22                    | -19                     |
| ·OOCH <sub>3</sub>                 | N1 (A) | -6                      | 97                     | -103                    | -27                    | 21                      |
|                                    | N2 (A) | -20                     |                        | -116                    | -32                    | 12                      |
|                                    | N2 (B) | 28                      |                        | -69                     | 31                     | -3                      |
|                                    | O1 (B) | 2                       |                        | -94                     | 10                     | -8                      |
|                                    | O2 (C) | -34                     |                        | -130                    | -26                    | -8                      |
|                                    | O3 (C) | -34                     |                        | -131                    | -25                    | -9                      |
| ·OO-CH=CH <sub>2</sub>             | N1 (A) | -6                      | 75                     | -81                     | -5                     | -1                      |
|                                    | N2 (A) | -19                     |                        | -94                     | -10                    | -10                     |
|                                    | N2 (B) | 28                      |                        | -47                     | 54                     | -25                     |
|                                    | O1 (B) | 3                       |                        | -72                     | 32                     | -30                     |
|                                    | O2 (C) | -33                     |                        | -108                    | -3                     | -30                     |
|                                    | O3 (C) | -33                     |                        | -108                    | -3                     | -31                     |
| DPPH                               | N1 (A) | 23                      | 69                     | -46                     | 30                     | -7                      |
|                                    | N2 (A) | 10                      |                        | -59                     | 25                     | -16                     |
|                                    | N2 (B) | 57                      |                        | -11                     | 89                     | -31                     |
|                                    | O1 (B) | 32                      |                        | -37                     | 67                     | -36                     |
|                                    | O2 (C) | -4                      |                        | -73                     | 32                     | -36                     |
|                                    | O3 (C) | -4                      |                        | -73                     | 32                     | -37                     |
| O <sub>2</sub> <sup>-</sup>        | N1 (A) | 58                      | 242                    | -184                    | 46                     | 11                      |
|                                    | N2 (A) | 44                      |                        | -198                    | 42                     | 2                       |
|                                    | N2 (B) | 92                      |                        | -150                    | 105                    | -13                     |
|                                    | O1 (B) | 66                      |                        | -176                    | 83                     | -17                     |
|                                    | O2 (C) | 30                      |                        | -211                    | 48                     | -18                     |
|                                    | O3 (C) | 30                      |                        | -212                    | 49                     | -19                     |

**Table S42.** Calculated reaction enthalpies (kJ mol<sup>-1</sup>) for the reactions of compound **o** with the selected radical species in water.

| <b>o</b>                           |        | HAT                     | SET-PT                 |                         | SPLET                  |                         |
|------------------------------------|--------|-------------------------|------------------------|-------------------------|------------------------|-------------------------|
| Radical                            |        | $\Delta H_{\text{BDE}}$ | $\Delta H_{\text{IP}}$ | $\Delta H_{\text{PDE}}$ | $\Delta H_{\text{PA}}$ | $\Delta H_{\text{ETE}}$ |
| ·OCH <sub>3</sub>                  | N1 (A) | -81                     |                        | -150                    | -73                    | -8                      |
|                                    | N2 (A) | -97                     |                        | -166                    | -77                    | -20                     |
|                                    | N2 (B) | -47                     | 69                     | -116                    | -14                    | -33                     |
|                                    | O1 (B) | -76                     |                        | -146                    | -41                    | -35                     |
|                                    | O1 (C) | -99                     |                        | -168                    | -54                    | -44                     |
| ·OC(CH <sub>3</sub> ) <sub>3</sub> | N1 (A) | -90                     |                        | -159                    | -82                    | -8                      |
|                                    | N2 (A) | -106                    |                        | -176                    | -87                    | -19                     |
|                                    | N2 (B) | -56                     | 70                     | -125                    | -23                    | -33                     |
|                                    | O1 (B) | -85                     |                        | -155                    | -51                    | -35                     |
|                                    | O1 (C) | -108                    |                        | -177                    | -64                    | -44                     |
| ·OH                                | N1 (A) | -151                    |                        | -140                    | -62                    | -88                     |
|                                    | N2 (A) | -167                    |                        | -156                    | -67                    | -100                    |
|                                    | N2 (B) | -117                    | -11                    | -106                    | -3                     | -113                    |
|                                    | O1 (B) | -146                    |                        | -136                    | -31                    | -115                    |
|                                    | O1 (C) | -169                    |                        | -158                    | -44                    | -125                    |
| ·OOH                               | N1 (A) | -13                     |                        | -103                    | -26                    | 13                      |
|                                    | N2 (A) | -29                     |                        | -119                    | -30                    | 1                       |
|                                    | N2 (B) | 21                      | 90                     | -69                     | 33                     | -13                     |
|                                    | O1 (B) | -9                      |                        | -99                     | 6                      | -15                     |
|                                    | O1 (C) | -31                     |                        | -121                    | -7                     | -24                     |
| ·OOCH <sub>3</sub>                 | N1 (A) | -6                      |                        | -105                    | -28                    | 22                      |
|                                    | N2 (A) | -22                     |                        | -122                    | -33                    | 11                      |
|                                    | N2 (B) | 28                      | 100                    | -72                     | 31                     | -3                      |
|                                    | O1 (B) | -2                      |                        | -101                    | 3                      | -5                      |
|                                    | O1 (C) | -24                     |                        | -123                    | -10                    | -14                     |
| ·OO-CH=CH <sub>2</sub>             | N1 (A) | -5                      |                        | -83                     | -6                     | 1                       |
|                                    | N2 (A) | -22                     |                        | -99                     | -10                    | -11                     |
|                                    | N2 (B) | 28                      | 78                     | -49                     | 53                     | -25                     |
|                                    | O1 (B) | -1                      |                        | -79                     | 26                     | -27                     |
|                                    | O1 (C) | -24                     |                        | -101                    | 13                     | -36                     |
| DPPH                               | N1 (A) | 24                      |                        | -48                     | 29                     | -6                      |
|                                    | N2 (A) | 7                       |                        | -64                     | 25                     | -17                     |
|                                    | N2 (B) | 57                      | 72                     | -14                     | 88                     | -31                     |
|                                    | O1 (B) | 28                      |                        | -44                     | 61                     | -33                     |
|                                    | O1 (C) | 6                       |                        | -66                     | 48                     | -42                     |
| O <sub>2</sub> <sup>-</sup>        | N1 (A) | 58                      |                        | -186                    | 45                     | 13                      |
|                                    | N2 (A) | 41                      |                        | -203                    | 41                     | 1                       |
|                                    | N2 (B) | 92                      | 244                    | -153                    | 104                    | -13                     |
|                                    | O1 (B) | 62                      |                        | -182                    | 77                     | -15                     |
|                                    | O1 (C) | 40                      |                        | -205                    | 64                     | -24                     |



**Table S43.** Calculated reaction enthalpies (kJ mol<sup>-1</sup>) for the reactions of compound **p** with the selected radical species in water.

| <b>p</b>                           |        | HAT                     | SET-PT                 |                         | SPLET                  |                         |
|------------------------------------|--------|-------------------------|------------------------|-------------------------|------------------------|-------------------------|
| Radical                            |        | $\Delta H_{\text{BDE}}$ | $\Delta H_{\text{IP}}$ | $\Delta H_{\text{PDE}}$ | $\Delta H_{\text{PA}}$ | $\Delta H_{\text{ETE}}$ |
| ·OCH <sub>3</sub>                  | N1 (A) | -82                     |                        | -141                    | -72                    | -10                     |
|                                    | N2 (A) | -96                     |                        | -155                    | -76                    | -19                     |
|                                    | N2 (B) | -48                     | 59                     | -107                    | -14                    | -34                     |
|                                    | O1 (B) | -73                     |                        | -132                    | -35                    | -38                     |
|                                    | O3 (C) | -102                    |                        | -161                    | -54                    | -48                     |
| ·OC(CH <sub>3</sub> ) <sub>3</sub> | N1 (A) | -91                     |                        | -151                    | -82                    | -10                     |
|                                    | N2 (A) | -105                    |                        | -164                    | -86                    | -19                     |
|                                    | N2 (B) | -57                     | 60                     | -116                    | -23                    | -34                     |
|                                    | O1 (B) | -82                     |                        | -141                    | -44                    | -38                     |
|                                    | O3 (C) | -111                    |                        | -170                    | -63                    | -47                     |
| ·OH                                | N1 (A) | -152                    |                        | -131                    | -62                    | -90                     |
|                                    | N2 (A) | -166                    |                        | -145                    | -66                    | -99                     |
|                                    | N2 (B) | -118                    | -21                    | -97                     | -3                     | -114                    |
|                                    | O1 (B) | -142                    |                        | -122                    | -24                    | -118                    |
|                                    | O3 (C) | -172                    |                        | -151                    | -44                    | -128                    |
| ·OOH                               | N1 (A) | -14                     |                        | -94                     | -25                    | 11                      |
|                                    | N2 (A) | -28                     |                        | -108                    | -29                    | 1                       |
|                                    | N2 (B) | 20                      | 80                     | -60                     | 34                     | -14                     |
|                                    | O1 (B) | -5                      |                        | -85                     | 13                     | -17                     |
|                                    | O3 (C) | -34                     |                        | -114                    | -7                     | -27                     |
| ·OOCH <sub>3</sub>                 | N1 (A) | -7                      |                        | -97                     | -28                    | 20                      |
|                                    | N2 (A) | -21                     |                        | -110                    | -32                    | 11                      |
|                                    | N2 (B) | 27                      | 90                     | -63                     | 31                     | -4                      |
|                                    | O1 (B) | 2                       |                        | -87                     | 10                     | -8                      |
|                                    | O3 (C) | -27                     |                        | -116                    | -9                     | -17                     |
| ·OO-CH=CH <sub>2</sub>             | N1 (A) | -7                      |                        | -75                     | -5                     | -1                      |
|                                    | N2 (A) | -20                     |                        | -88                     | -9                     | -11                     |
|                                    | N2 (B) | 28                      | 68                     | -40                     | 53                     | -26                     |
|                                    | O1 (B) | 3                       |                        | -65                     | 32                     | -30                     |
|                                    | O3 (C) | -26                     |                        | -94                     | 13                     | -39                     |
| DPPH                               | N1 (A) | 22                      |                        | -40                     | 30                     | -7                      |
|                                    | N2 (A) | 9                       |                        | -53                     | 26                     | -17                     |
|                                    | N2 (B) | 57                      | 62                     | -5                      | 88                     | -32                     |
|                                    | O1 (B) | 32                      |                        | -30                     | 67                     | -36                     |
|                                    | O3 (C) | 3                       |                        | -59                     | 48                     | -45                     |
| O <sub>2</sub> <sup>·-</sup>       | N1 (A) | 56                      |                        | -178                    | 46                     | 11                      |
|                                    | N2 (A) | 43                      |                        | -191                    | 42                     | 1                       |
|                                    | N2 (B) | 91                      | 234                    | -144                    | 104                    | -14                     |
|                                    | O1 (B) | 66                      |                        | -168                    | 83                     | -17                     |
|                                    | O3 (C) | 37                      |                        | -197                    | 64                     | -27                     |

**Table S44.** Calculated reaction enthalpies (kJ mol<sup>-1</sup>) for the reactions of compound **q** with the selected radical species in water.

| <b>q</b>                           |        | HAT                     | SET-PT                 |                         | SPLET                  |                         |
|------------------------------------|--------|-------------------------|------------------------|-------------------------|------------------------|-------------------------|
| Radical                            |        | $\Delta H_{\text{BDE}}$ | $\Delta H_{\text{IP}}$ | $\Delta H_{\text{PDE}}$ | $\Delta H_{\text{PA}}$ | $\Delta H_{\text{ETE}}$ |
| ·OCH <sub>3</sub>                  | N1 (A) | -81                     |                        | -135                    | -72                    | -9                      |
|                                    | N2 (A) | -95                     |                        | -148                    | -76                    | -19                     |
|                                    | N2 (B) | -46                     | 54                     | -100                    | -13                    | -33                     |
|                                    | O1 (B) | -72                     |                        | -126                    | -32                    | -40                     |
|                                    | O3 (C) | -117                    |                        | -171                    | -54                    | -63                     |
| ·OC(CH <sub>3</sub> ) <sub>3</sub> | N1 (A) | -90                     |                        | -144                    | -81                    | -9                      |
|                                    | N2 (A) | -104                    |                        | -158                    | -85                    | -18                     |
|                                    | N2 (B) | -55                     | 54                     | -109                    | -22                    | -33                     |
|                                    | O1 (B) | -81                     |                        | -135                    | -41                    | -40                     |
|                                    | O3 (C) | -126                    |                        | -180                    | -63                    | -63                     |
| ·OH                                | N1 (A) | -151                    |                        | -125                    | -62                    | -89                     |
|                                    | N2 (A) | -165                    |                        | -138                    | -66                    | -99                     |
|                                    | N2 (B) | -116                    | -26                    | -90                     | -3                     | -113                    |
|                                    | O1 (B) | -142                    |                        | -115                    | -22                    | -120                    |
|                                    | O3 (C) | -187                    |                        | -161                    | -44                    | -143                    |
| ·OOH                               | N1 (A) | -13                     |                        | -88                     | -25                    | 11                      |
|                                    | N2 (A) | -27                     |                        | -101                    | -29                    | 2                       |
|                                    | N2 (B) | 22                      | 74                     | -53                     | 34                     | -13                     |
|                                    | O1 (B) | -4                      |                        | -79                     | 15                     | -19                     |
|                                    | O3 (C) | -50                     |                        | -124                    | -7                     | -42                     |
| ·OOCH <sub>3</sub>                 | N1 (A) | -6                      |                        | -90                     | -27                    | 21                      |
|                                    | N2 (A) | -20                     |                        | -104                    | -31                    | 12                      |
|                                    | N2 (B) | 29                      | 84                     | -55                     | 32                     | -3                      |
|                                    | O1 (B) | 3                       |                        | -81                     | 13                     | -10                     |
|                                    | O3 (C) | -42                     |                        | -126                    | -10                    | -33                     |
| ·OO-CH=CH <sub>2</sub>             | N1 (A) | -6                      |                        | -68                     | -5                     | -1                      |
|                                    | N2 (A) | -19                     |                        | -82                     | -9                     | -10                     |
|                                    | N2 (B) | 29                      | 62                     | -33                     | 54                     | -25                     |
|                                    | O1 (B) | 4                       |                        | -59                     | 35                     | -31                     |
|                                    | O3 (C) | -42                     |                        | -104                    | 13                     | -55                     |
| DPPH                               | N1 (A) | 23                      |                        | -33                     | 30                     | -7                      |
|                                    | N2 (A) | 10                      |                        | -46                     | 26                     | -16                     |
|                                    | N2 (B) | 58                      | 56                     | 2                       | 89                     | -31                     |
|                                    | O1 (B) | 33                      |                        | -24                     | 70                     | -37                     |
|                                    | O3 (C) | -13                     |                        | -69                     | 48                     | -61                     |
| O <sub>2</sub> <sup>-</sup>        | N1 (A) | 58                      |                        | -171                    | 46                     | 11                      |
|                                    | N2 (A) | 44                      |                        | -185                    | 42                     | 2                       |
|                                    | N2 (B) | 92                      | 229                    | -136                    | 105                    | -13                     |
|                                    | O1 (B) | 67                      |                        | -162                    | 86                     | -19                     |
|                                    | O3 (C) | 21                      |                        | -208                    | 64                     | -42                     |

**Table S45.** Calculated reaction enthalpies (kJ mol<sup>-1</sup>) for the reactions of compound **r** with the selected radical species in water.

| <b>r</b>                           |        | HAT                     | SET-PT                 |                         | SPLET                  |                         |
|------------------------------------|--------|-------------------------|------------------------|-------------------------|------------------------|-------------------------|
| Radical                            |        | $\Delta H_{\text{BDE}}$ | $\Delta H_{\text{IP}}$ | $\Delta H_{\text{PDE}}$ | $\Delta H_{\text{PA}}$ | $\Delta H_{\text{ETE}}$ |
| ·OCH <sub>3</sub>                  | N1 (A) | -81                     |                        | -155                    | -75                    | -7                      |
|                                    | N2 (A) | -94                     |                        | -168                    | -77                    | -18                     |
|                                    | N2 (B) | -46                     | 73                     | -120                    | -14                    | -32                     |
|                                    | O1 (B) | -72                     |                        | -145                    | -35                    | -37                     |
|                                    | O2 (C) | -90                     |                        | -163                    | -64                    | -26                     |
| ·OC(CH <sub>3</sub> ) <sub>3</sub> | N1 (A) | -90                     |                        | -164                    | -84                    | -7                      |
|                                    | N2 (A) | -103                    |                        | -177                    | -86                    | -17                     |
|                                    | N2 (B) | -55                     | 74                     | -129                    | -23                    | -32                     |
|                                    | O1 (B) | -81                     |                        | -155                    | -45                    | -36                     |
|                                    | O2 (C) | -99                     |                        | -172                    | -73                    | -26                     |
| ·OH                                | N1 (A) | -151                    |                        | -145                    | -64                    | -87                     |
|                                    | N2 (A) | -164                    |                        | -158                    | -67                    | -98                     |
|                                    | N2 (B) | -116                    | -7                     | -110                    | -4                     | -113                    |
|                                    | O1 (B) | -142                    |                        | -135                    | -25                    | -117                    |
|                                    | O2 (C) | -160                    |                        | -153                    | -54                    | -106                    |
| ·OOH                               | N1 (A) | -14                     |                        | -108                    | -28                    | 14                      |
|                                    | N2 (A) | -27                     |                        | -121                    | -30                    | 3                       |
|                                    | N2 (B) | 21                      | 94                     | -73                     | 33                     | -12                     |
|                                    | O1 (B) | -4                      |                        | -98                     | 12                     | -16                     |
|                                    | O2 (C) | -22                     |                        | -116                    | -17                    | -5                      |
| ·OOCH <sub>3</sub>                 | N1 (A) | -6                      |                        | -110                    | -30                    | 24                      |
|                                    | N2 (A) | -19                     |                        | -123                    | -32                    | 13                      |
|                                    | N2 (B) | 28                      | 104                    | -75                     | 31                     | -2                      |
|                                    | O1 (B) | 3                       |                        | -101                    | 9                      | -6                      |
|                                    | O2 (C) | -15                     |                        | -119                    | -19                    | 4                       |
| ·OO-CH=CH <sub>2</sub>             | N1 (A) | -6                      |                        | -88                     | -8                     | 2                       |
|                                    | N2 (A) | -19                     |                        | -101                    | -10                    | -9                      |
|                                    | N2 (B) | 29                      | 82                     | -53                     | 53                     | -24                     |
|                                    | O1 (B) | 3                       |                        | -79                     | 32                     | -28                     |
|                                    | O2 (C) | -14                     |                        | -96                     | 3                      | -17                     |
| DPPH                               | N1 (A) | 23                      |                        | -53                     | 27                     | -4                      |
|                                    | N2 (A) | 10                      |                        | -66                     | 25                     | -15                     |
|                                    | N2 (B) | 58                      | 76                     | -18                     | 88                     | -30                     |
|                                    | O1 (B) | 32                      |                        | -43                     | 67                     | -34                     |
|                                    | O2 (C) | 15                      |                        | -61                     | 38                     | -23                     |
| O <sub>2</sub> <sup>·-</sup>       | N1 (A) | 57                      |                        | -191                    | 43                     | 14                      |
|                                    | N2 (A) | 44                      |                        | -204                    | 41                     | 3                       |
|                                    | N2 (B) | 92                      | 248                    | -156                    | 104                    | -12                     |
|                                    | O1 (B) | 67                      |                        | -182                    | 83                     | -16                     |
|                                    | O2 (C) | 49                      |                        | -200                    | 54                     | -5                      |

**Table S46.** Calculated reaction enthalpies (kJ mol<sup>-1</sup>) for the reactions of compound **s** with the selected radical species in water.

| <b>s</b>                           |        | HAT                     | SET-PT                 |                         | SPLET                  |                         |
|------------------------------------|--------|-------------------------|------------------------|-------------------------|------------------------|-------------------------|
| Radical                            |        | $\Delta H_{\text{BDE}}$ | $\Delta H_{\text{IP}}$ | $\Delta H_{\text{PDE}}$ | $\Delta H_{\text{PA}}$ | $\Delta H_{\text{ETE}}$ |
| ·OCH <sub>3</sub>                  | N1 (A) | -81                     |                        | -136                    | -72                    | -8                      |
|                                    | N2 (A) | -95                     | 56                     | -150                    | -77                    | -18                     |
|                                    | N2 (B) | -47                     |                        | -102                    | -14                    | -33                     |
|                                    | O1 (B) | -72                     |                        | -128                    | -35                    | -37                     |
| ·OC(CH <sub>3</sub> ) <sub>3</sub> | N1 (A) | -90                     |                        | -146                    | -82                    | -8                      |
|                                    | N2 (A) | -104                    | 56                     | -159                    | -86                    | -17                     |
|                                    | N2 (B) | -56                     |                        | -111                    | -23                    | -33                     |
|                                    | O1 (B) | -81                     |                        | -137                    | -44                    | -37                     |
| ·OH                                | N1 (A) | -151                    |                        | -126                    | -62                    | -89                     |
|                                    | N2 (A) | -165                    | -25                    | -140                    | -67                    | -98                     |
|                                    | N2 (B) | -117                    |                        | -92                     | -4                     | -113                    |
|                                    | O1 (B) | -142                    |                        | -117                    | -25                    | -117                    |
| ·OOH                               | N1 (A) | -13                     |                        | -89                     | -25                    | 12                      |
|                                    | N2 (A) | -27                     | 76                     | -103                    | -30                    | 3                       |
|                                    | N2 (B) | 21                      |                        | -55                     | 33                     | -12                     |
|                                    | O1 (B) | -4                      |                        | -80                     | 12                     | -17                     |
| ·OOCH <sub>3</sub>                 | N1 (A) | -6                      |                        | -92                     | -28                    | 22                      |
|                                    | N2 (A) | -20                     | 86                     | -105                    | -32                    | 13                      |
|                                    | N2 (B) | 28                      |                        | -58                     | 31                     | -3                      |
|                                    | O1 (B) | 3                       |                        | -83                     | 10                     | -7                      |
| ·OO-CH=CH <sub>2</sub>             | N1 (A) | -6                      |                        | -70                     | -6                     | 0                       |
|                                    | N2 (A) | -19                     | 64                     | -83                     | -10                    | -9                      |
|                                    | N2 (B) | 29                      |                        | -35                     | 53                     | -24                     |
|                                    | O1 (B) | 3                       |                        | -61                     | 32                     | -29                     |
| DPPH                               | N1 (A) | 23                      |                        | -35                     | 30                     | -6                      |
|                                    | N2 (A) | 10                      | 58                     | -48                     | 25                     | -15                     |
|                                    | N2 (B) | 58                      |                        | 0                       | 88                     | -30                     |
|                                    | O1 (B) | 32                      |                        | -26                     | 67                     | -35                     |
| O <sub>2</sub> <sup>·-</sup>       | N1 (A) | 58                      |                        | -173                    | 46                     | 12                      |
|                                    | N2 (A) | 44                      | 231                    | -187                    | 41                     | 3                       |
|                                    | N2 (B) | 92                      |                        | -139                    | 104                    | -12                     |
|                                    | O1 (B) | 67                      |                        | -164                    | 83                     | -17                     |

**Table S47.** Calculated reaction enthalpies (kJ mol<sup>-1</sup>) for the reactions of compound **t** with the selected radical species in water.

| <b>t</b>                           |        | HAT                     | SET-PT                 |                         | SPLET                  |                         |
|------------------------------------|--------|-------------------------|------------------------|-------------------------|------------------------|-------------------------|
| Radical                            |        | $\Delta H_{\text{BDE}}$ | $\Delta H_{\text{IP}}$ | $\Delta H_{\text{PDE}}$ | $\Delta H_{\text{PA}}$ | $\Delta H_{\text{ETE}}$ |
| ·OCH <sub>3</sub>                  | N1 (A) | -79                     |                        | -127                    | -75                    | -4                      |
|                                    | N2 (A) | -93                     |                        | -141                    | -80                    | -13                     |
|                                    | N2 (B) | -45                     | 48                     | -93                     | -16                    | -30                     |
|                                    | O1 (B) | -75                     |                        | -123                    | -44                    | -31                     |
|                                    | O1 (C) | -86                     |                        | -133                    | -80                    | -6                      |
| ·OC(CH <sub>3</sub> ) <sub>3</sub> | N1 (A) | -88                     |                        | -137                    | -85                    | -4                      |
|                                    | N2 (A) | -102                    |                        | -150                    | -89                    | -13                     |
|                                    | N2 (B) | -55                     | 48                     | -103                    | -25                    | -29                     |
|                                    | O1 (B) | -84                     |                        | -132                    | -53                    | -31                     |
|                                    | O1 (C) | -95                     |                        | -143                    | -89                    | -5                      |
| ·OH                                | N1 (A) | -149                    |                        | -117                    | -65                    | -84                     |
|                                    | N2 (A) | -163                    |                        | -131                    | -70                    | -93                     |
|                                    | N2 (B) | -115                    | -32                    | -83                     | -6                     | -110                    |
|                                    | O1 (B) | -145                    |                        | -113                    | -34                    | -111                    |
|                                    | O1 (C) | -156                    |                        | -123                    | -70                    | -86                     |
| ·OOH                               | N1 (A) | -12                     |                        | -80                     | -28                    | 16                      |
|                                    | N2 (A) | -25                     |                        | -94                     | -33                    | 7                       |
|                                    | N2 (B) | 22                      | 68                     | -46                     | 31                     | -9                      |
|                                    | O1 (B) | -8                      |                        | -76                     | 3                      | -10                     |
|                                    | O1 (C) | -18                     |                        | -86                     | -33                    | 15                      |
| ·OOCH <sub>3</sub>                 | N1 (A) | -4                      |                        | -83                     | -31                    | 26                      |
|                                    | N2 (A) | -18                     |                        | -96                     | -35                    | 17                      |
|                                    | N2 (B) | 29                      | 78                     | -49                     | 29                     | 1                       |
|                                    | O1 (B) | 0                       |                        | -78                     | 1                      | -1                      |
|                                    | O1 (C) | -11                     |                        | -89                     | -35                    | 25                      |
| ·OO-CH=CH <sub>2</sub>             | N1 (A) | -4                      |                        | -60                     | -8                     | 4                       |
|                                    | N2 (A) | -18                     |                        | -74                     | -13                    | -5                      |
|                                    | N2 (B) | 30                      | 56                     | -26                     | 51                     | -21                     |
|                                    | O1 (B) | 0                       |                        | -56                     | 23                     | -23                     |
|                                    | O1 (C) | -10                     |                        | -67                     | -13                    | 3                       |
| DPPH                               | N1 (A) | 25                      |                        | -25                     | 27                     | -2                      |
|                                    | N2 (A) | 11                      |                        | -39                     | 22                     | -11                     |
|                                    | N2 (B) | 59                      | 50                     | 9                       | 86                     | -27                     |
|                                    | O1 (B) | 29                      |                        | -21                     | 58                     | -29                     |
|                                    | O1 (C) | 19                      |                        | -31                     | 22                     | -3                      |
| O <sub>2</sub> <sup>·-</sup>       | N1 (A) | 59                      |                        | -164                    | 43                     | 16                      |
|                                    | N2 (A) | 45                      |                        | -177                    | 38                     | 7                       |
|                                    | N2 (B) | 93                      | 223                    | -130                    | 102                    | -9                      |
|                                    | O1 (B) | 63                      |                        | -160                    | 74                     | -10                     |
|                                    | O1 (C) | 53                      |                        | -170                    | 38                     | 15                      |

**Table S48.** Calculated reaction enthalpies (kJ mol<sup>-1</sup>) for the reactions of compound **a** with the selected radical species in benzene.

| <b>a</b>                           |        | HAT                     | SET-PT                 |                         | SPLET                  |                         |
|------------------------------------|--------|-------------------------|------------------------|-------------------------|------------------------|-------------------------|
| Radical                            |        | $\Delta H_{\text{BDE}}$ | $\Delta H_{\text{IP}}$ | $\Delta H_{\text{PDE}}$ | $\Delta H_{\text{PA}}$ | $\Delta H_{\text{ETE}}$ |
| ·OCH <sub>3</sub>                  | N1 (A) | -76                     |                        | -359                    | -144                   | 68                      |
|                                    | N2 (A) | -103                    | 283                    | -386                    | -173                   | 70                      |
|                                    | N2 (B) | -36                     |                        | -319                    | -74                    | 38                      |
|                                    | O1 (B) | -72                     |                        | -355                    | -42                    | -31                     |
| ·OC(CH <sub>3</sub> ) <sub>3</sub> | N1 (A) | -85                     |                        | -356                    | -141                   | 56                      |
|                                    | N2 (A) | -113                    | 271                    | -383                    | -171                   | 58                      |
|                                    | N2 (B) | -45                     |                        | -316                    | -71                    | 25                      |
|                                    | O1 (B) | -81                     |                        | -352                    | -39                    | -43                     |
| ·OH                                | N1 (A) | -145                    |                        | -379                    | -165                   | 20                      |
|                                    | N2 (A) | -172                    | 235                    | -407                    | -194                   | 22                      |
|                                    | N2 (B) | -105                    |                        | -340                    | -95                    | -10                     |
|                                    | O1 (B) | -141                    |                        | -376                    | -63                    | -79                     |
| ·OOH                               | N1 (A) | -8                      |                        | -327                    | -113                   | 105                     |
|                                    | N2 (A) | -35                     | 319                    | -355                    | -142                   | 107                     |
|                                    | N2 (B) | 32                      |                        | -288                    | -43                    | 74                      |
|                                    | O1 (B) | -4                      |                        | -324                    | -10                    | 6                       |
| ·OOCH <sub>3</sub>                 | N1 (A) | 1                       |                        | -322                    | -107                   | 108                     |
|                                    | N2 (A) | -27                     | 323                    | -350                    | -137                   | 110                     |
|                                    | N2 (B) | 40                      |                        | -282                    | -37                    | 78                      |
|                                    | O1 (B) | 5                       |                        | -318                    | -5                     | 10                      |
| ·OO-CH=CH <sub>2</sub>             | N1 (A) | 0                       |                        | -275                    | -61                    | 60                      |
|                                    | N2 (A) | -28                     | 275                    | -303                    | -90                    | 62                      |
|                                    | N2 (B) | 39                      |                        | -236                    | 9                      | 29                      |
|                                    | O1 (B) | 3                       |                        | -272                    | 42                     | -39                     |
| DPPH                               | N1 (A) | 20                      |                        | -156                    | 59                     | -39                     |
|                                    | N2 (A) | -8                      | 176                    | -184                    | 29                     | -37                     |
|                                    | N2 (B) | 59                      |                        | -117                    | 129                    | -70                     |
|                                    | O1 (B) | 23                      |                        | -152                    | 161                    | -138                    |
| O <sub>2</sub> <sup>-</sup>        | N1 (A) | 88                      |                        | -717                    | -17                    | 105                     |
|                                    | N2 (A) | 61                      | 806                    | -745                    | -46                    | 107                     |
|                                    | N2 (B) | 128                     |                        | -678                    | 54                     | 74                      |
|                                    | O1 (B) | 92                      |                        | -714                    | 86                     | 6                       |

**Table S49.** Calculated reaction enthalpies (kJ mol<sup>-1</sup>) for the reactions of compound **b** with the selected radical species in benzene.

| <b>b</b>                           |        | HAT                     | SET-PT                 |                         | SPLET                  |                         |
|------------------------------------|--------|-------------------------|------------------------|-------------------------|------------------------|-------------------------|
| Radical                            |        | $\Delta H_{\text{BDE}}$ | $\Delta H_{\text{IP}}$ | $\Delta H_{\text{PDE}}$ | $\Delta H_{\text{PA}}$ | $\Delta H_{\text{ETE}}$ |
| ·OCH <sub>3</sub>                  | N1 (A) | -75                     |                        | -351                    | -142                   | 67                      |
|                                    | N2 (A) | -103                    |                        | -379                    | -168                   | 65                      |
|                                    | N2 (B) | -38                     | 276                    | -313                    | -70                    | 32                      |
|                                    | O1 (B) | -76                     |                        | -351                    | -87                    | 11                      |
|                                    | O1 (C) | -81                     |                        | -357                    | -129                   | 48                      |
| ·OC(CH <sub>3</sub> ) <sub>3</sub> | N1 (A) | -84                     |                        | -348                    | -139                   | 55                      |
|                                    | N2 (A) | -112                    |                        | -376                    | -165                   | 53                      |
|                                    | N2 (B) | -47                     | 263                    | -310                    | -67                    | 20                      |
|                                    | O1 (B) | -85                     |                        | -348                    | -84                    | -1                      |
|                                    | O1 (C) | -91                     |                        | -354                    | -126                   | 36                      |
| ·OH                                | N1 (A) | -144                    |                        | -371                    | -163                   | 19                      |
|                                    | N2 (A) | -172                    |                        | -400                    | -189                   | 17                      |
|                                    | N2 (B) | -107                    | 227                    | -334                    | -91                    | -16                     |
|                                    | O1 (B) | -145                    |                        | -372                    | -107                   | -37                     |
|                                    | O1 (C) | -150                    |                        | -378                    | -150                   | 0                       |
| ·OOH                               | N1 (A) | -7                      |                        | -319                    | -110                   | 103                     |
|                                    | N2 (A) | -35                     |                        | -347                    | -137                   | 102                     |
|                                    | N2 (B) | 30                      | 312                    | -282                    | -39                    | 69                      |
|                                    | O1 (B) | -8                      |                        | -320                    | -55                    | 47                      |
|                                    | O1 (C) | -14                     |                        | -326                    | -98                    | 84                      |
| ·OOCH <sub>3</sub>                 | N1 (A) | 2                       |                        | -314                    | -105                   | 107                     |
|                                    | N2 (A) | -26                     |                        | -342                    | -132                   | 105                     |
|                                    | N2 (B) | 39                      | 316                    | -277                    | -33                    | 72                      |
|                                    | O1 (B) | 1                       |                        | -314                    | -50                    | 51                      |
|                                    | O1 (C) | -5                      |                        | -320                    | -93                    | 88                      |
| ·OO-CH=CH <sub>2</sub>             | N1 (A) | 0                       |                        | -267                    | -59                    | 59                      |
|                                    | N2 (A) | -28                     |                        | -295                    | -85                    | 57                      |
|                                    | N2 (B) | 37                      | 267                    | -230                    | 13                     | 24                      |
|                                    | O1 (B) | -1                      |                        | -268                    | -3                     | 3                       |
|                                    | O1 (C) | -6                      |                        | -274                    | -46                    | 40                      |
| DPPH                               | N1 (A) | 21                      |                        | -148                    | 61                     | -40                     |
|                                    | N2 (A) | -8                      |                        | -176                    | 34                     | -42                     |
|                                    | N2 (B) | 58                      | 168                    | -111                    | 132                    | -75                     |
|                                    | O1 (B) | 20                      |                        | -149                    | 116                    | -96                     |
|                                    | O1 (C) | 14                      |                        | -154                    | 73                     | -59                     |
| O <sub>2</sub> <sup>-</sup>        | N1 (A) | 89                      |                        | -709                    | -14                    | 103                     |
|                                    | N2 (A) | 61                      |                        | -738                    | -41                    | 102                     |
|                                    | N2 (B) | 126                     | 799                    | -672                    | 57                     | 69                      |
|                                    | O1 (B) | 88                      |                        | -710                    | 41                     | 47                      |
|                                    | O1 (C) | 83                      |                        | -716                    | -2                     | 84                      |

**Table S50.** Calculated reaction enthalpies (kJ mol<sup>-1</sup>) for the reactions of compound **c** with the selected radical species in benzene.

| <b>c</b>                           |        | HAT                     | SET-PT                 |                         | SPLET                  |                         |
|------------------------------------|--------|-------------------------|------------------------|-------------------------|------------------------|-------------------------|
| Radical                            |        | $\Delta H_{\text{BDE}}$ | $\Delta H_{\text{IP}}$ | $\Delta H_{\text{PDE}}$ | $\Delta H_{\text{PA}}$ | $\Delta H_{\text{ETE}}$ |
| ·OCH <sub>3</sub>                  | N1 (A) | -76                     |                        | -357                    | -144                   | 68                      |
|                                    | N2 (A) | -104                    |                        | -385                    | -173                   | 69                      |
|                                    | N2 (B) | -37                     | 281                    | -317                    | -72                    | 35                      |
|                                    | O1 (B) | -73                     |                        | -354                    | -91                    | 18                      |
|                                    | O2 (C) | -69                     |                        | -350                    | -105                   | 36                      |
| ·OC(CH <sub>3</sub> ) <sub>3</sub> | N1 (A) | -85                     |                        | -354                    | -141                   | 56                      |
|                                    | N2 (A) | -113                    |                        | -382                    | -170                   | 57                      |
|                                    | N2 (B) | -46                     | 269                    | -314                    | -69                    | 23                      |
|                                    | O1 (B) | -82                     |                        | -351                    | -88                    | 6                       |
|                                    | O2 (C) | -78                     |                        | -347                    | -102                   | 24                      |
| ·OH                                | N1 (A) | -145                    |                        | -378                    | -165                   | 20                      |
|                                    | N2 (A) | -173                    |                        | -405                    | -194                   | 21                      |
|                                    | N2 (B) | -106                    | 233                    | -338                    | -93                    | -13                     |
|                                    | O1 (B) | -142                    |                        | -375                    | -112                   | -30                     |
|                                    | O2 (C) | -138                    |                        | -371                    | -126                   | -12                     |
| ·OOH                               | N1 (A) | -8                      |                        | -325                    | -112                   | 104                     |
|                                    | N2 (A) | -36                     |                        | -353                    | -142                   | 106                     |
|                                    | N2 (B) | 31                      | 317                    | -286                    | -41                    | 72                      |
|                                    | O1 (B) | -5                      |                        | -322                    | -60                    | 54                      |
|                                    | O2 (C) | -1                      |                        | -318                    | -74                    | 73                      |
| ·OOCH <sub>3</sub>                 | N1 (A) | 1                       |                        | -320                    | -107                   | 108                     |
|                                    | N2 (A) | -27                     |                        | -348                    | -137                   | 109                     |
|                                    | N2 (B) | 40                      | 321                    | -281                    | -35                    | 75                      |
|                                    | O1 (B) | 4                       |                        | -317                    | -54                    | 58                      |
|                                    | O2 (C) | 8                       |                        | -313                    | -69                    | 76                      |
| ·OO-CH=CH <sub>2</sub>             | N1 (A) | -1                      |                        | -273                    | -60                    | 60                      |
|                                    | N2 (A) | -29                     |                        | -301                    | -90                    | 61                      |
|                                    | N2 (B) | 39                      | 273                    | -234                    | 11                     | 27                      |
|                                    | O1 (B) | 2                       |                        | -271                    | -8                     | 10                      |
|                                    | O2 (C) | 6                       |                        | -266                    | -22                    | 28                      |
| DPPH                               | N1 (A) | 20                      |                        | -154                    | 59                     | -39                     |
|                                    | N2 (A) | -8                      |                        | -182                    | 29                     | -38                     |
|                                    | N2 (B) | 59                      | 174                    | -115                    | 131                    | -72                     |
|                                    | O1 (B) | 22                      |                        | -151                    | 112                    | -89                     |
|                                    | O2 (C) | 27                      |                        | -147                    | 97                     | -71                     |
| O <sub>2</sub> <sup>-</sup>        | N1 (A) | 88                      |                        | -715                    | -16                    | 104                     |
|                                    | N2 (A) | 60                      |                        | -743                    | -46                    | 106                     |
|                                    | N2 (B) | 127                     | 804                    | -676                    | 56                     | 72                      |
|                                    | O1 (B) | 91                      |                        | -713                    | 37                     | 54                      |
|                                    | O2 (C) | 95                      |                        | -709                    | 22                     | 73                      |



**Table S51.** Calculated reaction enthalpies (kJ mol<sup>-1</sup>) for the reactions of compound **d** with the selected radical species in benzene.

| <b>d</b>                           |        | HAT                     | SET-PT                 |                         | SPLET                  |                         |
|------------------------------------|--------|-------------------------|------------------------|-------------------------|------------------------|-------------------------|
| Radical                            |        | $\Delta H_{\text{BDE}}$ | $\Delta H_{\text{IP}}$ | $\Delta H_{\text{PDE}}$ | $\Delta H_{\text{PA}}$ | $\Delta H_{\text{ETE}}$ |
| ·OCH <sub>3</sub>                  | N1 (A) | -76                     |                        | -358                    | -143                   | 68                      |
|                                    | N2 (A) | -104                    |                        | -386                    | -172                   | 69                      |
|                                    | N2 (B) | -37                     | 282                    | -319                    | -74                    | 38                      |
|                                    | O1 (B) | -71                     |                        | -353                    | -42                    | -30                     |
|                                    | O3 (C) | -76                     |                        | -358                    | -101                   | 25                      |
| ·OC(CH <sub>3</sub> ) <sub>3</sub> | N1 (A) | -85                     |                        | -355                    | -140                   | 55                      |
|                                    | N2 (A) | -113                    |                        | -383                    | -169                   | 57                      |
|                                    | N2 (B) | -46                     | 270                    | -316                    | -71                    | 25                      |
|                                    | O1 (B) | -80                     |                        | -350                    | -39                    | -42                     |
|                                    | O3 (C) | -85                     |                        | -355                    | -98                    | 13                      |
| ·OH                                | N1 (A) | -145                    |                        | -379                    | -164                   | 20                      |
|                                    | N2 (A) | -173                    |                        | -407                    | -193                   | 21                      |
|                                    | N2 (B) | -106                    | 234                    | -340                    | -95                    | -11                     |
|                                    | O1 (B) | -140                    |                        | -374                    | -63                    | -78                     |
|                                    | O3 (C) | -145                    |                        | -379                    | -122                   | -23                     |
| ·OOH                               | N1 (A) | -8                      |                        | -327                    | -112                   | 104                     |
|                                    | N2 (A) | -36                     |                        | -354                    | -141                   | 105                     |
|                                    | N2 (B) | 31                      | 319                    | -288                    | -43                    | 74                      |
|                                    | O1 (B) | -3                      |                        | -322                    | -10                    | 7                       |
|                                    | O3 (C) | -8                      |                        | -326                    | -70                    | 62                      |
| ·OOCH <sub>3</sub>                 | N1 (A) | 1                       |                        | -321                    | -107                   | 108                     |
|                                    | N2 (A) | -27                     |                        | -349                    | -136                   | 109                     |
|                                    | N2 (B) | 40                      | 322                    | -282                    | -38                    | 78                      |
|                                    | O1 (B) | 6                       |                        | -317                    | -5                     | 10                      |
|                                    | O3 (C) | 1                       |                        | -321                    | -64                    | 65                      |
| ·OO-CH=CH <sub>2</sub>             | N1 (A) | -1                      |                        | -275                    | -60                    | 60                      |
|                                    | N2 (A) | -28                     |                        | -303                    | -89                    | 61                      |
|                                    | N2 (B) | 38                      | 274                    | -236                    | 9                      | 29                      |
|                                    | O1 (B) | 4                       |                        | -270                    | 42                     | -38                     |
|                                    | O3 (C) | 0                       |                        | -274                    | -18                    | 17                      |
| DPPH                               | N1 (A) | 20                      |                        | -155                    | 59                     | -39                     |
|                                    | N2 (A) | -8                      |                        | -183                    | 30                     | -38                     |
|                                    | N2 (B) | 59                      | 175                    | -116                    | 128                    | -70                     |
|                                    | O1 (B) | 24                      |                        | -151                    | 161                    | -137                    |
|                                    | O3 (C) | 20                      |                        | -155                    | 102                    | -82                     |
| O <sub>2</sub> · <sup>-</sup>      | N1 (A) | 88                      |                        | -717                    | -16                    | 104                     |
|                                    | N2 (A) | 60                      |                        | -745                    | -45                    | 105                     |
|                                    | N2 (B) | 127                     | 805                    | -678                    | 53                     | 74                      |
|                                    | O1 (B) | 93                      |                        | -712                    | 86                     | 7                       |
|                                    | O3 (C) | 89                      |                        | -717                    | 27                     | 62                      |

**Table S52.** Calculated reaction enthalpies (kJ mol<sup>-1</sup>) for the reactions of compound **e** with the selected radical species in benzene.

| <b>e</b>                           |        | HAT                     | SET-PT                 |                         | SPLET                  |                         |
|------------------------------------|--------|-------------------------|------------------------|-------------------------|------------------------|-------------------------|
| Radical                            |        | $\Delta H_{\text{BDE}}$ | $\Delta H_{\text{IP}}$ | $\Delta H_{\text{PDE}}$ | $\Delta H_{\text{PA}}$ | $\Delta H_{\text{ETE}}$ |
| ·OCH <sub>3</sub>                  | N1 (A) | -74                     |                        | -363                    | -149                   | 75                      |
|                                    | N2 (A) | -101                    | 289                    | -390                    | -178                   | 77                      |
|                                    | N2 (B) | -35                     |                        | -324                    | -79                    | 44                      |
|                                    | O1 (B) | -70                     |                        | -359                    | -49                    | -22                     |
| ·OC(CH <sub>3</sub> ) <sub>3</sub> | N1 (A) | -83                     |                        | -360                    | -146                   | 63                      |
|                                    | N2 (A) | -111                    | 277                    | -387                    | -176                   | 65                      |
|                                    | N2 (B) | -45                     |                        | -321                    | -76                    | 32                      |
|                                    | O1 (B) | -80                     |                        | -356                    | -46                    | -34                     |
| ·OH                                | N1 (A) | -143                    |                        | -384                    | -170                   | 27                      |
|                                    | N2 (A) | -170                    | 241                    | -411                    | -199                   | 29                      |
|                                    | N2 (B) | -104                    |                        | -345                    | -100                   | -4                      |
|                                    | O1 (B) | -139                    |                        | -380                    | -70                    | -70                     |
| ·OOH                               | N1 (A) | -6                      |                        | -332                    | -118                   | 112                     |
|                                    | N2 (A) | -34                     | 325                    | -359                    | -147                   | 114                     |
|                                    | N2 (B) | 33                      |                        | -293                    | -48                    | 81                      |
|                                    | O1 (B) | -2                      |                        | -328                    | -17                    | 15                      |
| ·OOCH <sub>3</sub>                 | N1 (A) | 3                       |                        | -326                    | -112                   | 115                     |
|                                    | N2 (A) | -25                     | 329                    | -353                    | -142                   | 117                     |
|                                    | N2 (B) | 41                      |                        | -287                    | -43                    | 84                      |
|                                    | O1 (B) | 6                       |                        | -322                    | -12                    | 18                      |
| ·OO-CH=CH <sub>2</sub>             | N1 (A) | 1                       |                        | -280                    | -66                    | 67                      |
|                                    | N2 (A) | -26                     | 281                    | -307                    | -95                    | 69                      |
|                                    | N2 (B) | 40                      |                        | -241                    | 4                      | 36                      |
|                                    | O1 (B) | 5                       |                        | -276                    | 34                     | -30                     |
| DPPH                               | N1 (A) | 21                      |                        | -160                    | 53                     | -32                     |
|                                    | N2 (A) | -6                      | 182                    | -187                    | 24                     | -30                     |
|                                    | N2 (B) | 60                      |                        | -121                    | 123                    | -63                     |
|                                    | O1 (B) | 25                      |                        | -156                    | 154                    | -129                    |
| O <sub>2</sub> <sup>-</sup>        | N1 (A) | 90                      |                        | -722                    | -22                    | 112                     |
|                                    | N2 (A) | 63                      | 812                    | -749                    | -51                    | 114                     |
|                                    | N2 (B) | 129                     |                        | -683                    | 48                     | 81                      |
|                                    | O1 (B) | 94                      |                        | -718                    | 79                     | 15                      |

**Table S53.** Calculated reaction enthalpies (kJ mol<sup>-1</sup>) for the reactions of compound **f** with the selected radical species in benzene.

| <b>f</b>                           |        | HAT                     | SET-PT                 |                         | SPLET                  |                         |
|------------------------------------|--------|-------------------------|------------------------|-------------------------|------------------------|-------------------------|
| Radical                            |        | $\Delta H_{\text{BDE}}$ | $\Delta H_{\text{IP}}$ | $\Delta H_{\text{PDE}}$ | $\Delta H_{\text{PA}}$ | $\Delta H_{\text{ETE}}$ |
| ·OCH <sub>3</sub>                  | N1 (A) | -75                     | 289                    | -364                    | -150                   | 76                      |
|                                    | N2 (A) | -102                    |                        | -391                    | -182                   | 80                      |
|                                    | N2 (B) | -35                     |                        | -324                    | -80                    | 44                      |
|                                    | O1 (B) | -72                     |                        | -361                    | -49                    | -22                     |
| ·OC(CH <sub>3</sub> ) <sub>3</sub> | N1 (A) | -84                     | 277                    | -361                    | -147                   | 63                      |
|                                    | N2 (A) | -111                    |                        | -388                    | -179                   | 68                      |
|                                    | N2 (B) | -44                     |                        | -321                    | -77                    | 32                      |
|                                    | O1 (B) | -81                     |                        | -358                    | -46                    | -34                     |
| ·OH                                | N1 (A) | -144                    | 241                    | -385                    | -171                   | 28                      |
|                                    | N2 (A) | -171                    |                        | -412                    | -203                   | 32                      |
|                                    | N2 (B) | -104                    |                        | -345                    | -100                   | -4                      |
|                                    | O1 (B) | -141                    |                        | -382                    | -70                    | -70                     |
| ·OOH                               | N1 (A) | -7                      | 326                    | -333                    | -119                   | 112                     |
|                                    | N2 (A) | -34                     |                        | -360                    | -151                   | 117                     |
|                                    | N2 (B) | 33                      |                        | -293                    | -48                    | 81                      |
|                                    | O1 (B) | -4                      |                        | -329                    | -18                    | 14                      |
| ·OOCH <sub>3</sub>                 | N1 (A) | 2                       | 329                    | -327                    | -114                   | 116                     |
|                                    | N2 (A) | -25                     |                        | -354                    | -146                   | 120                     |
|                                    | N2 (B) | 42                      |                        | -288                    | -43                    | 84                      |
|                                    | O1 (B) | 5                       |                        | -324                    | -13                    | 18                      |
| ·OO-CH=CH <sub>2</sub>             | N1 (A) | 0                       | 281                    | -281                    | -67                    | 67                      |
|                                    | N2 (A) | -27                     |                        | -308                    | -99                    | 72                      |
|                                    | N2 (B) | 40                      |                        | -241                    | 4                      | 36                      |
|                                    | O1 (B) | 3                       |                        | -277                    | 34                     | -30                     |
| DPPH                               | N1 (A) | 21                      | 182                    | -161                    | 52                     | -32                     |
|                                    | N2 (A) | -7                      |                        | -189                    | 20                     | -27                     |
|                                    | N2 (B) | 60                      |                        | -122                    | 123                    | -63                     |
|                                    | O1 (B) | 24                      |                        | -158                    | 153                    | -129                    |
| O <sub>2</sub> <sup>·-</sup>       | N1 (A) | 89                      | 812                    | -723                    | -23                    | 112                     |
|                                    | N2 (A) | 62                      |                        | -750                    | -55                    | 117                     |
|                                    | N2 (B) | 129                     |                        | -683                    | 48                     | 81                      |
|                                    | O1 (B) | 92                      |                        | -720                    | 78                     | 14                      |

**Table S54.** Calculated reaction enthalpies (kJ mol<sup>-1</sup>) for the reactions of compound **g** with the selected radical species in benzene.

| <b>g</b>                           |        | HAT                     | SET-PT                 |                         | SPLET                  |                         |
|------------------------------------|--------|-------------------------|------------------------|-------------------------|------------------------|-------------------------|
| Radical                            |        | $\Delta H_{\text{BDE}}$ | $\Delta H_{\text{IP}}$ | $\Delta H_{\text{PDE}}$ | $\Delta H_{\text{PA}}$ | $\Delta H_{\text{ETE}}$ |
| ·OCH <sub>3</sub>                  | N1 (A) | -75                     |                        | -363                    | -149                   | 74                      |
|                                    | N2 (A) | -103                    | 288                    | -391                    | -178                   | 76                      |
|                                    | N2 (B) | -36                     |                        | -324                    | -78                    | 43                      |
|                                    | O1 (B) | -55                     |                        | -343                    | -48                    | -7                      |
| ·OC(CH <sub>3</sub> ) <sub>3</sub> | N1 (A) | -84                     |                        |                         | -360                   | -146                    |
|                                    | N2 (A) | -112                    | 276                    | -388                    | -175                   | 64                      |
|                                    | N2 (B) | -45                     |                        | -321                    | -76                    | 31                      |
|                                    | O1 (B) | -64                     |                        | -340                    | -45                    | -19                     |
| ·OH                                | N1 (A) | -144                    |                        |                         | -384                   | -170                    |
|                                    | N2 (A) | -171                    | 240                    | -411                    | -199                   | 28                      |
|                                    | N2 (B) | -104                    |                        | -344                    | -99                    | -5                      |
|                                    | O1 (B) | -124                    |                        | -364                    | -69                    | -55                     |
| ·OOH                               | N1 (A) | -7                      |                        |                         | -332                   | -118                    |
|                                    | N2 (A) | -35                     | 325                    | -359                    | -147                   | 112                     |
|                                    | N2 (B) | 32                      |                        | -292                    | -47                    | 80                      |
|                                    | O1 (B) | 13                      |                        | -311                    | -17                    | 30                      |
| ·OOCH <sub>3</sub>                 | N1 (A) | 2                       |                        |                         | -326                   | -112                    |
|                                    | N2 (A) | -26                     | 328                    | -354                    | -142                   | 116                     |
|                                    | N2 (B) | 41                      |                        | -287                    | -42                    | 83                      |
|                                    | O1 (B) | 22                      |                        | -306                    | -11                    | 33                      |
| ·OO-CH=CH <sub>2</sub>             | N1 (A) | 0                       |                        |                         | -280                   | -66                     |
|                                    | N2 (A) | -27                     | 280                    | -307                    | -95                    | 68                      |
|                                    | N2 (B) | 40                      |                        | -240                    | 5                      | 35                      |
|                                    | O1 (B) | 20                      |                        | -260                    | 35                     | -15                     |
| DPPH                               | N1 (A) | 20                      |                        |                         | -160                   | 54                      |
|                                    | N2 (A) | -7                      | 181                    | -188                    | 24                     | -31                     |
|                                    | N2 (B) | 60                      |                        | -121                    | 124                    | -64                     |
|                                    | O1 (B) | 41                      |                        | -140                    | 155                    | -114                    |
| O <sub>2</sub> <sup>-</sup>        | N1 (A) | 89                      |                        |                         | -722                   | -22                     |
|                                    | N2 (A) | 62                      | 811                    | -749                    | -51                    | 112                     |
|                                    | N2 (B) | 129                     |                        | -682                    | 49                     | 80                      |
|                                    | O1 (B) | 109                     |                        | -702                    | 79                     | 30                      |

**Table S55.** Calculated reaction enthalpies (kJ mol<sup>-1</sup>) for the reactions of compound **h** with the selected radical species in benzene.

| <b>h</b>                           |        | HAT                     | SET-PT                 |                         | SPLET                  |                         |
|------------------------------------|--------|-------------------------|------------------------|-------------------------|------------------------|-------------------------|
| Radical                            |        | $\Delta H_{\text{BDE}}$ | $\Delta H_{\text{IP}}$ | $\Delta H_{\text{PDE}}$ | $\Delta H_{\text{PA}}$ | $\Delta H_{\text{ETE}}$ |
| ·OCH <sub>3</sub>                  | N1 (A) | -73                     |                        | -363                    | -152                   | 79                      |
|                                    | N2 (A) | -97                     | 290                    | -387                    | -176                   | 80                      |
|                                    | N2 (B) | -35                     |                        | -325                    | -83                    | 49                      |
|                                    | O1 (B) | -51                     |                        | -341                    | -94                    | 43                      |
| ·OC(CH <sub>3</sub> ) <sub>3</sub> | N1 (A) | -82                     |                        | -360                    | -149                   | 66                      |
|                                    | N2 (A) | -106                    | 278                    | -384                    | -173                   | 68                      |
|                                    | N2 (B) | -44                     |                        | -322                    | -80                    | 37                      |
|                                    | O1 (B) | -60                     |                        | -338                    | -91                    | 31                      |
| ·OH                                | N1 (A) | -142                    |                        | -384                    | -173                   | 31                      |
|                                    | N2 (A) | -166                    | 242                    | -408                    | -197                   | 32                      |
|                                    | N2 (B) | -103                    |                        | -345                    | -104                   | 1                       |
|                                    | O1 (B) | -120                    |                        | -362                    | -115                   | -5                      |
| ·OOH                               | N1 (A) | -5                      |                        | -332                    | -120                   | 115                     |
|                                    | N2 (A) | -29                     | 327                    | -355                    | -145                   | 116                     |
|                                    | N2 (B) | 33                      |                        | -293                    | -52                    | 85                      |
|                                    | O1 (B) | 17                      |                        | -310                    | -63                    | 80                      |
| ·OOCH <sub>3</sub>                 | N1 (A) | 4                       |                        | -326                    | -115                   | 119                     |
|                                    | N2 (A) | -20                     | 330                    | -350                    | -140                   | 120                     |
|                                    | N2 (B) | 42                      |                        | -288                    | -47                    | 89                      |
|                                    | O1 (B) | 26                      |                        | -304                    | -58                    | 83                      |
| ·OO-CH=CH <sub>2</sub>             | N1 (A) | 2                       |                        | -280                    | -69                    | 70                      |
|                                    | N2 (A) | -22                     | 282                    | -303                    | -93                    | 72                      |
|                                    | N2 (B) | 41                      |                        | -241                    | 0                      | 41                      |
|                                    | O1 (B) | 24                      |                        | -258                    | -11                    | 35                      |
| DPPH                               | N1 (A) | 22                      |                        | -161                    | 51                     | -29                     |
|                                    | N2 (A) | -1                      | 183                    | -184                    | 26                     | -27                     |
|                                    | N2 (B) | 61                      |                        | -122                    | 119                    | -58                     |
|                                    | O1 (B) | 44                      |                        | -138                    | 108                    | -64                     |
| O <sub>2</sub> <sup>-</sup>        | N1 (A) | 91                      |                        | -722                    | -24                    | 115                     |
|                                    | N2 (A) | 67                      | 813                    | -746                    | -49                    | 116                     |
|                                    | N2 (B) | 130                     |                        | -683                    | 44                     | 85                      |
|                                    | O1 (B) | 113                     |                        | -700                    | 33                     | 80                      |

**Table S56.** Calculated reaction enthalpies (kJ mol<sup>-1</sup>) for the reactions of compound **i** with the selected radical species in benzene.

| <b>i</b>                           |        | HAT                     | SET-PT                 |                         | SPLET                  |                         |
|------------------------------------|--------|-------------------------|------------------------|-------------------------|------------------------|-------------------------|
| Radical                            |        | $\Delta H_{\text{BDE}}$ | $\Delta H_{\text{IP}}$ | $\Delta H_{\text{PDE}}$ | $\Delta H_{\text{PA}}$ | $\Delta H_{\text{ETE}}$ |
| ·OCH <sub>3</sub>                  | N1 (A) | -70                     |                        | -370                    | -157                   | 87                      |
|                                    | N2 (A) | -97                     | 299                    | -396                    | -186                   | 89                      |
|                                    | N2 (B) | -29                     |                        | -328                    | -79                    | 50                      |
|                                    | O1 (B) | -71                     |                        | -370                    | -58                    | -13                     |
| ·OC(CH <sub>3</sub> ) <sub>3</sub> | N1 (A) | -80                     |                        | -367                    | -154                   | 75                      |
|                                    | N2 (A) | -106                    | 287                    | -393                    | -183                   | 77                      |
|                                    | N2 (B) | -38                     |                        | -325                    | -76                    | 38                      |
|                                    | O1 (B) | -80                     |                        | -367                    | -55                    | -25                     |
| ·OH                                | N1 (A) | -139                    |                        | -390                    | -178                   | 39                      |
|                                    | N2 (A) | -166                    | 251                    | -417                    | -207                   | 41                      |
|                                    | N2 (B) | -98                     |                        | -349                    | -100                   | 2                       |
|                                    | O1 (B) | -140                    |                        | -391                    | -79                    | -61                     |
| ·OOH                               | N1 (A) | -3                      |                        | -338                    | -126                   | 123                     |
|                                    | N2 (A) | -29                     | 336                    | -365                    | -154                   | 125                     |
|                                    | N2 (B) | 39                      |                        | -297                    | -47                    | 86                      |
|                                    | O1 (B) | -3                      |                        | -339                    | -27                    | 23                      |
| ·OOCH <sub>3</sub>                 | N1 (A) | 6                       |                        | -333                    | -121                   | 127                     |
|                                    | N2 (A) | -20                     | 339                    | -359                    | -149                   | 129                     |
|                                    | N2 (B) | 48                      |                        | -291                    | -42                    | 90                      |
|                                    | O1 (B) | 6                       |                        | -334                    | -21                    | 27                      |
| ·OO-CH=CH <sub>2</sub>             | N1 (A) | 5                       |                        | -286                    | -74                    | 79                      |
|                                    | N2 (A) | -22                     | 291                    | -313                    | -103                   | 81                      |
|                                    | N2 (B) | 46                      |                        | -245                    | 4                      | 42                      |
|                                    | O1 (B) | 4                       |                        | -287                    | 25                     | -21                     |
| DPPH                               | N1 (A) | 25                      |                        | -167                    | 45                     | -20                     |
|                                    | N2 (A) | -1                      | 192                    | -193                    | 17                     | -18                     |
|                                    | N2 (B) | 67                      |                        | -125                    | 124                    | -57                     |
|                                    | O1 (B) | 24                      |                        | -168                    | 145                    | -120                    |
| O <sub>2</sub> <sup>·-</sup>       | N1 (A) | 94                      |                        | -728                    | -30                    | 123                     |
|                                    | N2 (A) | 67                      | 822                    | -755                    | -58                    | 125                     |
|                                    | N2 (B) | 135                     |                        | -687                    | 49                     | 86                      |
|                                    | O1 (B) | 93                      |                        | -729                    | 70                     | 23                      |

**Table S57.** Calculated reaction enthalpies (kJ mol<sup>-1</sup>) for the reactions of compound **j** with the selected radical species in benzene.

| <b>j</b>                           |        | HAT                     | SET-PT                 |                         | SPLET                  |                         |
|------------------------------------|--------|-------------------------|------------------------|-------------------------|------------------------|-------------------------|
| Radical                            |        | $\Delta H_{\text{BDE}}$ | $\Delta H_{\text{IP}}$ | $\Delta H_{\text{PDE}}$ | $\Delta H_{\text{PA}}$ | $\Delta H_{\text{ETE}}$ |
| ·OCH <sub>3</sub>                  | N1 (A) | -74                     |                        | -373                    | -161                   | 87                      |
|                                    | N2 (A) | -100                    | 299                    | -399                    | -190                   | 89                      |
|                                    | N2 (B) | -33                     |                        | -332                    | -89                    | 56                      |
|                                    | O1 (B) | -71                     |                        | -370                    | -65                    | -6                      |
| ·OC(CH <sub>3</sub> ) <sub>3</sub> | N1 (A) | -83                     |                        | -370                    | -158                   | 75                      |
|                                    | N2 (A) | -109                    | 287                    | -397                    | -187                   | 77                      |
|                                    | N2 (B) | -42                     |                        | -329                    | -86                    | 44                      |
|                                    | O1 (B) | -80                     |                        | -367                    | -62                    | -18                     |
| ·OH                                | N1 (A) | -143                    |                        | -394                    | -182                   | 39                      |
|                                    | N2 (A) | -169                    | 251                    | -420                    | -211                   | 41                      |
|                                    | N2 (B) | -102                    |                        | -353                    | -110                   | 8                       |
|                                    | O1 (B) | -140                    |                        | -391                    | -86                    | -54                     |
| ·OOH                               | N1 (A) | -6                      |                        | -342                    | -129                   | 124                     |
|                                    | N2 (A) | -32                     | 336                    | -368                    | -158                   | 126                     |
|                                    | N2 (B) | 35                      |                        | -301                    | -58                    | 92                      |
|                                    | O1 (B) | -3                      |                        | -339                    | -34                    | 31                      |
| ·OOCH <sub>3</sub>                 | N1 (A) | 3                       |                        | -336                    | -124                   | 127                     |
|                                    | N2 (A) | -23                     | 339                    | -363                    | -153                   | 130                     |
|                                    | N2 (B) | 44                      |                        | -296                    | -52                    | 96                      |
|                                    | O1 (B) | 6                       |                        | -333                    | -28                    | 34                      |
| ·OO-CH=CH <sub>2</sub>             | N1 (A) | 1                       |                        | -290                    | -78                    | 79                      |
|                                    | N2 (A) | -25                     | 291                    | -316                    | -106                   | 81                      |
|                                    | N2 (B) | 42                      |                        | -249                    | -6                     | 48                      |
|                                    | O1 (B) | 4                       |                        | -287                    | 18                     | -14                     |
| DPPH                               | N1 (A) | 22                      |                        | -170                    | 42                     | -20                     |
|                                    | N2 (A) | -5                      | 192                    | -197                    | 13                     | -18                     |
|                                    | N2 (B) | 62                      |                        | -130                    | 114                    | -51                     |
|                                    | O1 (B) | 25                      |                        | -167                    | 138                    | -113                    |
| O <sub>2</sub> <sup>-</sup>        | N1 (A) | 90                      |                        | -732                    | -33                    | 124                     |
|                                    | N2 (A) | 64                      | 822                    | -758                    | -62                    | 126                     |
|                                    | N2 (B) | 131                     |                        | -691                    | 39                     | 92                      |
|                                    | O1 (B) | 93                      |                        | -729                    | 63                     | 31                      |

**Table S58.** Calculated reaction enthalpies (kJ mol<sup>-1</sup>) for the reactions of compound **k** with the selected radical species in benzene.

| <b>k</b>                           |        | HAT                     | SET-PT                 |                         | SPLET                  |                         |
|------------------------------------|--------|-------------------------|------------------------|-------------------------|------------------------|-------------------------|
| Radical                            |        | $\Delta H_{\text{BDE}}$ | $\Delta H_{\text{IP}}$ | $\Delta H_{\text{PDE}}$ | $\Delta H_{\text{PA}}$ | $\Delta H_{\text{ETE}}$ |
| ·OCH <sub>3</sub>                  | N1 (A) | -75                     |                        | -359                    | -145                   | 70                      |
|                                    | N2 (A) | -102                    | 284                    | -386                    | -175                   | 73                      |
|                                    | N2 (B) | -36                     |                        | -320                    | -74                    | 38                      |
|                                    | O1 (B) | -77                     |                        | -362                    | -50                    | -27                     |
| ·OC(CH <sub>3</sub> ) <sub>3</sub> | N1 (A) | -84                     |                        | -356                    | -142                   | 58                      |
|                                    | N2 (A) | -111                    | 272                    | -383                    | -172                   | 60                      |
|                                    | N2 (B) | -45                     |                        | -317                    | -71                    | 26                      |
|                                    | O1 (B) | -86                     |                        | -359                    | -47                    | -39                     |
| ·OH                                | N1 (A) | -144                    |                        | -380                    | -166                   | 22                      |
|                                    | N2 (A) | -171                    | 236                    | -407                    | -196                   | 25                      |
|                                    | N2 (B) | -105                    |                        | -341                    | -95                    | -10                     |
|                                    | O1 (B) | -146                    |                        | -382                    | -71                    | -75                     |
| ·OOH                               | N1 (A) | -7                      |                        | -328                    | -114                   | 106                     |
|                                    | N2 (A) | -34                     | 321                    | -355                    | -143                   | 109                     |
|                                    | N2 (B) | 32                      |                        | -289                    | -43                    | 74                      |
|                                    | O1 (B) | -9                      |                        | -330                    | -19                    | 9                       |
| ·OOCH <sub>3</sub>                 | N1 (A) | 2                       |                        | -323                    | -108                   | 110                     |
|                                    | N2 (A) | -25                     | 324                    | -350                    | -138                   | 113                     |
|                                    | N2 (B) | 41                      |                        | -284                    | -37                    | 78                      |
|                                    | O1 (B) | -1                      |                        | -325                    | -13                    | 13                      |
| ·OO-CH=CH <sub>2</sub>             | N1 (A) | 0                       |                        | -276                    | -62                    | 62                      |
|                                    | N2 (A) | -27                     | 276                    | -303                    | -92                    | 65                      |
|                                    | N2 (B) | 39                      |                        | -237                    | 9                      | 30                      |
|                                    | O1 (B) | -2                      |                        | -278                    | 33                     | -35                     |
| DPPH                               | N1 (A) | 20                      |                        | -157                    | 58                     | -37                     |
|                                    | N2 (A) | -7                      | 177                    | -184                    | 28                     | -34                     |
|                                    | N2 (B) | 59                      |                        | -118                    | 129                    | -69                     |
|                                    | O1 (B) | 18                      |                        | -159                    | 153                    | -134                    |
| O <sub>2</sub> <sup>-</sup>        | N1 (A) | 89                      |                        | -718                    | -17                    | 106                     |
|                                    | N2 (A) | 62                      | 807                    | -745                    | -47                    | 109                     |
|                                    | N2 (B) | 128                     |                        | -679                    | 54                     | 74                      |
|                                    | O1 (B) | 87                      |                        | -720                    | 77                     | 9                       |



**Table S59.** Calculated reaction enthalpies (kJ mol<sup>-1</sup>) for the reactions of compound **I** with the selected radical species in benzene.

| I                                  |        | HAT                     | SET-PT                 |                         | SPLET                  |                         |
|------------------------------------|--------|-------------------------|------------------------|-------------------------|------------------------|-------------------------|
| Radical                            |        | $\Delta H_{\text{BDE}}$ | $\Delta H_{\text{IP}}$ | $\Delta H_{\text{PDE}}$ | $\Delta H_{\text{PA}}$ | $\Delta H_{\text{ETE}}$ |
| ·OCH <sub>3</sub>                  | N1 (A) | -76                     |                        | -357                    | -143                   | 67                      |
|                                    | N2 (A) | -104                    | 282                    | -386                    | -172                   | 68                      |
|                                    | N2 (B) | -37                     |                        | -318                    | -74                    | 37                      |
|                                    | O1 (B) | -72                     |                        | -353                    | -41                    | -31                     |
| ·OC(CH <sub>3</sub> ) <sub>3</sub> | N1 (A) | -85                     |                        | -355                    | -140                   | 55                      |
|                                    | N2 (A) | -113                    | 269                    | -383                    | -169                   | 56                      |
|                                    | N2 (B) | -46                     |                        | -315                    | -71                    | 25                      |
|                                    | O1 (B) | -81                     |                        | -350                    | -38                    | -43                     |
| ·OH                                | N1 (A) | -145                    |                        | -378                    | -164                   | 19                      |
|                                    | N2 (A) | -173                    | 233                    | -407                    | -193                   | 20                      |
|                                    | N2 (B) | -106                    |                        | -339                    | -95                    | -11                     |
|                                    | O1 (B) | -141                    |                        | -374                    | -62                    | -79                     |
| ·OOH                               | N1 (A) | -8                      |                        | -326                    | -112                   | 104                     |
|                                    | N2 (A) | -36                     | 318                    | -354                    | -141                   | 104                     |
|                                    | N2 (B) | 31                      |                        | -287                    | -42                    | 73                      |
|                                    | O1 (B) | -4                      |                        | -322                    | -10                    | 6                       |
| ·OOCH <sub>3</sub>                 | N1 (A) | 1                       |                        | -321                    | -106                   | 107                     |
|                                    | N2 (A) | -27                     | 322                    | -349                    | -135                   | 108                     |
|                                    | N2 (B) | 40                      |                        | -282                    | -37                    | 77                      |
|                                    | O1 (B) | 5                       |                        | -317                    | -4                     | 9                       |
| ·OO-CH=CH <sub>2</sub>             | N1 (A) | -1                      |                        | -274                    | -60                    | 59                      |
|                                    | N2 (A) | -29                     | 273                    | -302                    | -89                    | 60                      |
|                                    | N2 (B) | 38                      |                        | -235                    | 10                     | 29                      |
|                                    | O1 (B) | 3                       |                        | -270                    | 42                     | -39                     |
| DPPH                               | N1 (A) | 20                      |                        | -155                    | 60                     | -40                     |
|                                    | N2 (A) | -9                      | 174                    | -183                    | 31                     | -39                     |
|                                    | N2 (B) | 59                      |                        | -116                    | 129                    | -70                     |
|                                    | O1 (B) | 24                      |                        | -151                    | 162                    | -138                    |
| O <sub>2</sub> <sup>-</sup>        | N1 (A) | 88                      |                        | -716                    | -15                    | 104                     |
|                                    | N2 (A) | 60                      | 804                    | -745                    | -44                    | 104                     |
|                                    | N2 (B) | 127                     |                        | -677                    | 54                     | 73                      |
|                                    | O1 (B) | 92                      |                        | -712                    | 86                     | 6                       |

**Table S60.** Calculated reaction enthalpies (kJ mol<sup>-1</sup>) for the reactions of compound **m** with the selected radical species in benzene.

| <b>m</b>                           |        | HAT                     | SET-PT                 |                         | SPLET                  |                         |
|------------------------------------|--------|-------------------------|------------------------|-------------------------|------------------------|-------------------------|
| Radical                            |        | $\Delta H_{\text{BDE}}$ | $\Delta H_{\text{IP}}$ | $\Delta H_{\text{PDE}}$ | $\Delta H_{\text{PA}}$ | $\Delta H_{\text{ETE}}$ |
| ·OCH <sub>3</sub>                  | N1 (A) | -74                     |                        | -349                    | -143                   | 69                      |
|                                    | N2 (A) | -101                    |                        | -377                    | -172                   | 71                      |
|                                    | N2 (B) | -35                     | 275                    | -310                    | -62                    | 27                      |
|                                    | O1 (B) | -56                     |                        | -331                    | -83                    | 27                      |
|                                    | O1 (C) | -112                    |                        | -387                    | -152                   | 41                      |
|                                    | O2 (C) | -105                    |                        | -380                    | -143                   | 38                      |
| ·OC(CH <sub>3</sub> ) <sub>3</sub> | N1 (A) | -84                     |                        | -346                    | -140                   | 57                      |
|                                    | N2 (A) | -111                    |                        | -374                    | -169                   | 59                      |
|                                    | N2 (B) | -44                     | 263                    | -307                    | -59                    | 15                      |
|                                    | O1 (B) | -65                     |                        | -328                    | -80                    | 15                      |
|                                    | O1 (C) | -121                    |                        | -384                    | -150                   | 29                      |
|                                    | O2 (C) | -114                    |                        | -377                    | -140                   | 25                      |
| ·OH                                | N1 (A) | -143                    |                        | -370                    | -164                   | 21                      |
|                                    | N2 (A) | -170                    |                        | -397                    | -193                   | 23                      |
|                                    | N2 (B) | -104                    | 227                    | -331                    | -83                    | -21                     |
|                                    | O1 (B) | -125                    |                        | -352                    | -104                   | -21                     |
|                                    | O1 (C) | -181                    |                        | -408                    | -173                   | -7                      |
|                                    | O2 (C) | -174                    |                        | -401                    | -164                   | -10                     |
| ·OOH                               | N1 (A) | -6                      |                        | -318                    | -112                   | 105                     |
|                                    | N2 (A) | -34                     |                        | -345                    | -141                   | 107                     |
|                                    | N2 (B) | 33                      | 312                    | -279                    | -31                    | 64                      |
|                                    | O1 (B) | 12                      |                        | -300                    | -52                    | 64                      |
|                                    | O1 (C) | -44                     |                        | -356                    | -121                   | 77                      |
|                                    | O2 (C) | -37                     |                        | -349                    | -111                   | 74                      |
| ·OOCH <sub>3</sub>                 | N1 (A) | 2                       |                        | -313                    | -106                   | 109                     |
|                                    | N2 (A) | -25                     |                        | -340                    | -136                   | 111                     |
|                                    | N2 (B) | 42                      | 315                    | -273                    | -26                    | 67                      |
|                                    | O1 (B) | 21                      |                        | -294                    | -46                    | 67                      |
|                                    | O1 (C) | -35                     |                        | -350                    | -116                   | 81                      |
|                                    | O2 (C) | -28                     |                        | -343                    | -106                   | 78                      |
| ·OO-CH=CH <sub>2</sub>             | N1 (A) | 1                       |                        | -266                    | -60                    | 61                      |
|                                    | N2 (A) | -26                     |                        | -293                    | -89                    | 63                      |
|                                    | N2 (B) | 40                      | 267                    | -227                    | 21                     | 19                      |
|                                    | O1 (B) | 19                      |                        | -248                    | 0                      | 19                      |
|                                    | O1 (C) | -37                     |                        | -304                    | -69                    | 33                      |
|                                    | O2 (C) | -30                     |                        | -297                    | -59                    | 30                      |
| DPPH                               | N1 (A) | 21                      |                        | -147                    | 60                     | -38                     |
|                                    | N2 (A) | -6                      |                        | -174                    | 30                     | -36                     |
|                                    | N2 (B) | 61                      | 168                    | -107                    | 140                    | -80                     |
|                                    | O1 (B) | 40                      |                        | -128                    | 120                    | -80                     |
|                                    | O1 (C) | -16                     |                        | -184                    | 50                     | -66                     |
|                                    | O2 (C) | -10                     |                        | -178                    | 60                     | -70                     |
| O <sub>2</sub> <sup>-</sup>        | N1 (A) | 90                      |                        | -708                    | -15                    | 105                     |
|                                    | N2 (A) | 63                      |                        | -735                    | -45                    | 107                     |
|                                    | N2 (B) | 129                     | 798                    | -669                    | 65                     | 64                      |
|                                    | O1 (B) | 108                     |                        | -690                    | 45                     | 64                      |
|                                    | O1 (C) | 52                      |                        | -746                    | -25                    | 77                      |
|                                    | O2 (C) | 59                      |                        | -739                    | -15                    | 74                      |

**Table S61.** Calculated reaction enthalpies (kJ mol<sup>-1</sup>) for the reactions of compound **n** with the selected radical species in benzene.

| <b>n</b>                           |        | HAT                     | SET-PT                 |                         | SPLET                  |                         |
|------------------------------------|--------|-------------------------|------------------------|-------------------------|------------------------|-------------------------|
| Radical                            |        | $\Delta H_{\text{BDE}}$ | $\Delta H_{\text{IP}}$ | $\Delta H_{\text{PDE}}$ | $\Delta H_{\text{PA}}$ | $\Delta H_{\text{ETE}}$ |
| ·OCH <sub>3</sub>                  | N1 (A) | -76                     | 279                    | -355                    | -144                   | 68                      |
|                                    | N2 (A) | -104                    |                        | -383                    | -174                   | 70                      |
|                                    | N2 (B) | -37                     |                        | -316                    | -71                    | 34                      |
|                                    | O1 (B) | -74                     |                        | -353                    | -90                    | 16                      |
|                                    | O2 (C) | -105                    |                        | -384                    | -134                   | 29                      |
|                                    | O3 (C) | -109                    |                        | -388                    | -133                   | 24                      |
| ·OC(CH <sub>3</sub> ) <sub>3</sub> | N1 (A) | -85                     | 267                    | -352                    | -141                   | 55                      |
|                                    | N2 (A) | -113                    |                        | -380                    | -171                   | 58                      |
|                                    | N2 (B) | -46                     |                        | -313                    | -68                    | 22                      |
|                                    | O1 (B) | -83                     |                        | -350                    | -87                    | 4                       |
|                                    | O2 (C) | -114                    |                        | -381                    | -131                   | 17                      |
|                                    | O3 (C) | -118                    |                        | -385                    | -130                   | 12                      |
| ·OH                                | N1 (A) | -145                    | 231                    | -376                    | -165                   | 20                      |
|                                    | N2 (A) | -173                    |                        | -404                    | -195                   | 22                      |
|                                    | N2 (B) | -105                    |                        | -336                    | -92                    | -14                     |
|                                    | O1 (B) | -143                    |                        | -374                    | -111                   | -32                     |
|                                    | O2 (C) | -174                    |                        | -405                    | -155                   | -19                     |
|                                    | O3 (C) | -178                    |                        | -409                    | -154                   | -24                     |
| ·OOH                               | N1 (A) | -8                      | 316                    | -324                    | -113                   | 104                     |
|                                    | N2 (A) | -36                     |                        | -351                    | -142                   | 106                     |
|                                    | N2 (B) | 31                      |                        | -284                    | -39                    | 71                      |
|                                    | O1 (B) | -6                      |                        | -321                    | -58                    | 53                      |
|                                    | O2 (C) | -37                     |                        | -353                    | -103                   | 66                      |
|                                    | O3 (C) | -41                     |                        | -357                    | -102                   | 61                      |
| ·OOCH <sub>3</sub>                 | N1 (A) | 1                       | 319                    | -319                    | -107                   | 108                     |
|                                    | N2 (A) | -27                     |                        | -346                    | -137                   | 110                     |
|                                    | N2 (B) | 40                      |                        | -279                    | -34                    | 74                      |
|                                    | O1 (B) | 3                       |                        | -316                    | -53                    | 56                      |
|                                    | O2 (C) | -28                     |                        | -347                    | -97                    | 69                      |
|                                    | O3 (C) | -32                     |                        | -352                    | -97                    | 64                      |
| ·OO-CH=CH <sub>2</sub>             | N1 (A) | -1                      | 271                    | -272                    | -61                    | 60                      |
|                                    | N2 (A) | -29                     |                        | -300                    | -90                    | 62                      |
|                                    | N2 (B) | 39                      |                        | -232                    | 13                     | 26                      |
|                                    | O1 (B) | 1                       |                        | -270                    | -6                     | 8                       |
|                                    | O2 (C) | -30                     |                        | -301                    | -51                    | 21                      |
|                                    | O3 (C) | -34                     |                        | -305                    | -50                    | 16                      |
| DPPH                               | N1 (A) | 19                      | 172                    | -153                    | 59                     | -39                     |
|                                    | N2 (A) | -8                      |                        | -180                    | 29                     | -37                     |
|                                    | N2 (B) | 59                      |                        | -113                    | 132                    | -73                     |
|                                    | O1 (B) | 22                      |                        | -150                    | 113                    | -91                     |
|                                    | O2 (C) | -10                     |                        | -181                    | 68                     | -78                     |
|                                    | O3 (C) | -14                     |                        | -186                    | 69                     | -83                     |
| O <sub>2</sub> <sup>·-</sup>       | N1 (A) | 88                      | 802                    | -714                    | -16                    | 104                     |
|                                    | N2 (A) | 60                      |                        | -742                    | -46                    | 106                     |
|                                    | N2 (B) | 128                     |                        | -674                    | 57                     | 71                      |
|                                    | O1 (B) | 90                      |                        | -712                    | 38                     | 53                      |
|                                    | O2 (C) | 59                      |                        | -743                    | -7                     | 66                      |
|                                    | O3 (C) | 55                      |                        | -747                    | -6                     | 61                      |

**Table S62.** Calculated reaction enthalpies (kJ mol<sup>-1</sup>) for the reactions of compound **o** with the selected radical species in benzene.

| <b>o</b>                           |        | HAT                     | SET-PT                 |                         | SPLET                  |                         |
|------------------------------------|--------|-------------------------|------------------------|-------------------------|------------------------|-------------------------|
| Radical                            |        | $\Delta H_{\text{BDE}}$ | $\Delta H_{\text{IP}}$ | $\Delta H_{\text{PDE}}$ | $\Delta H_{\text{PA}}$ | $\Delta H_{\text{ETE}}$ |
| ·OCH <sub>3</sub>                  | N1 (A) | -76                     |                        | -347                    | -140                   | 64                      |
|                                    | N2 (A) | -103                    |                        | -375                    | -166                   | 63                      |
|                                    | N2 (B) | -38                     | 272                    | -310                    | -68                    | 29                      |
|                                    | O1 (B) | -75                     |                        | -346                    | -80                    | 6                       |
|                                    | O2 (C) | -87                     |                        | -358                    | -109                   | 22                      |
| ·OC(CH <sub>3</sub> ) <sub>3</sub> | N1 (A) | -85                     |                        | -344                    | -137                   | 52                      |
|                                    | N2 (A) | -112                    |                        | -372                    | -163                   | 50                      |
|                                    | N2 (B) | -48                     | 259                    | -307                    | -65                    | 17                      |
|                                    | O1 (B) | -84                     |                        | -343                    | -77                    | -6                      |
|                                    | O2 (C) | -96                     |                        | -355                    | -106                   | 10                      |
| ·OH                                | N1 (A) | -145                    |                        | -368                    | -160                   | 16                      |
|                                    | N2 (A) | -172                    |                        | -396                    | -187                   | 15                      |
|                                    | N2 (B) | -107                    | 224                    | -331                    | -89                    | -19                     |
|                                    | O1 (B) | -143                    |                        | -367                    | -101                   | -42                     |
|                                    | O2 (C) | -156                    |                        | -379                    | -130                   | -26                     |
| ·OOH                               | N1 (A) | -8                      |                        | -316                    | -108                   | 101                     |
|                                    | N2 (A) | -35                     |                        | -343                    | -134                   | 99                      |
|                                    | N2 (B) | 29                      | 308                    | -279                    | -36                    | 66                      |
|                                    | O1 (B) | -7                      |                        | -315                    | -49                    | 42                      |
|                                    | O2 (C) | -19                     |                        | -327                    | -78                    | 59                      |
| ·OOCH <sub>3</sub>                 | N1 (A) | 1                       |                        | -310                    | -103                   | 104                     |
|                                    | N2 (A) | -26                     |                        | -338                    | -129                   | 103                     |
|                                    | N2 (B) | 38                      | 312                    | -273                    | -31                    | 69                      |
|                                    | O1 (B) | 2                       |                        | -309                    | -44                    | 46                      |
|                                    | O2 (C) | -10                     |                        | -322                    | -72                    | 63                      |
| ·OO-CH=CH <sub>2</sub>             | N1 (A) | 0                       |                        | -264                    | -56                    | 56                      |
|                                    | N2 (A) | -28                     |                        | -292                    | -82                    | 54                      |
|                                    | N2 (B) | 37                      | 264                    | -227                    | 16                     | 21                      |
|                                    | O1 (B) | 1                       |                        | -263                    | 3                      | -2                      |
|                                    | O2 (C) | -12                     |                        | -275                    | -26                    | 14                      |
| DPPH                               | N1 (A) | 20                      |                        | -145                    | 63                     | -43                     |
|                                    | N2 (A) | -8                      |                        | -172                    | 37                     | -45                     |
|                                    | N2 (B) | 57                      | 165                    | -107                    | 135                    | -78                     |
|                                    | O1 (B) | 21                      |                        | -144                    | 122                    | -101                    |
|                                    | O2 (C) | 9                       |                        | -156                    | 93                     | -85                     |
| O <sub>2</sub> <sup>·-</sup>       | N1 (A) | 89                      |                        | -706                    | -12                    | 101                     |
|                                    | N2 (A) | 61                      |                        | -734                    | -38                    | 99                      |
|                                    | N2 (B) | 126                     | 795                    | -669                    | 60                     | 66                      |
|                                    | O1 (B) | 90                      |                        | -705                    | 47                     | 42                      |
|                                    | O2 (C) | 77                      |                        | -717                    | 18                     | 59                      |

**Table S63.** Calculated reaction enthalpies (kJ mol<sup>-1</sup>) for the reactions of compound **p** with the selected radical species in benzene.

| <b>p</b>                           |        | HAT                     | SET-PT                 |                         | SPLET                  |                         |
|------------------------------------|--------|-------------------------|------------------------|-------------------------|------------------------|-------------------------|
| Radical                            |        | $\Delta H_{\text{BDE}}$ | $\Delta H_{\text{IP}}$ | $\Delta H_{\text{PDE}}$ | $\Delta H_{\text{PA}}$ | $\Delta H_{\text{ETE}}$ |
| ·OCH <sub>3</sub>                  | N1 (A) | -76                     |                        | -380                    | -148                   | 73                      |
|                                    | N2 (A) | -103                    |                        | -408                    | -172                   | 69                      |
|                                    | N2 (B) | -37                     | 304                    | -341                    | -78                    | 41                      |
|                                    | O1 (B) | -47                     |                        | -351                    | -44                    | -3                      |
|                                    | O3 (C) | -82                     |                        | -386                    | -82                    | 0                       |
| ·OC(CH <sub>3</sub> ) <sub>3</sub> | N1 (A) | -85                     |                        | -377                    | -145                   | 61                      |
|                                    | N2 (A) | -113                    |                        | -405                    | -169                   | 57                      |
|                                    | N2 (B) | -46                     | 292                    | -338                    | -75                    | 29                      |
|                                    | O1 (B) | -56                     |                        | -348                    | -41                    | -15                     |
|                                    | O3 (C) | -91                     |                        | -383                    | -79                    | -12                     |
| ·OH                                | N1 (A) | -144                    |                        | -401                    | -169                   | 25                      |
|                                    | N2 (A) | -172                    |                        | -429                    | -193                   | 21                      |
|                                    | N2 (B) | -106                    | 256                    | -362                    | -99                    | -7                      |
|                                    | O1 (B) | -116                    |                        | -372                    | -65                    | -51                     |
|                                    | O3 (C) | -151                    |                        | -407                    | -103                   | -48                     |
| ·OOH                               | N1 (A) | -8                      |                        | -348                    | -117                   | 109                     |
|                                    | N2 (A) | -36                     |                        | -376                    | -141                   | 105                     |
|                                    | N2 (B) | 31                      | 341                    | -310                    | -46                    | 77                      |
|                                    | O1 (B) | 21                      |                        | -320                    | -13                    | 34                      |
|                                    | O3 (C) | -14                     |                        | -355                    | -50                    | 37                      |
| ·OOCH <sub>3</sub>                 | N1 (A) | 1                       |                        | -343                    | -112                   | 113                     |
|                                    | N2 (A) | -27                     |                        | -371                    | -136                   | 109                     |
|                                    | N2 (B) | 40                      | 344                    | -304                    | -41                    | 81                      |
|                                    | O1 (B) | 30                      |                        | -314                    | -7                     | 37                      |
|                                    | O3 (C) | -5                      |                        | -349                    | -45                    | 40                      |
| ·OO-CH=CH <sub>2</sub>             | N1 (A) | 0                       |                        | -297                    | -65                    | 65                      |
|                                    | N2 (A) | -28                     |                        | -324                    | -89                    | 61                      |
|                                    | N2 (B) | 38                      | 296                    | -258                    | 6                      | 33                      |
|                                    | O1 (B) | 28                      |                        | -268                    | 39                     | -11                     |
|                                    | O3 (C) | -7                      |                        | -303                    | 2                      | -8                      |
| DPPH                               | N1 (A) | 20                      |                        | -177                    | 54                     | -34                     |
|                                    | N2 (A) | -8                      |                        | -205                    | 30                     | -38                     |
|                                    | N2 (B) | 59                      | 197                    | -138                    | 125                    | -66                     |
|                                    | O1 (B) | 49                      |                        | -148                    | 159                    | -110                    |
|                                    | O3 (C) | 14                      |                        | -183                    | 121                    | -107                    |
| O <sub>2</sub> <sup>·-</sup>       | N1 (A) | 89                      |                        | -739                    | -21                    | 109                     |
|                                    | N2 (A) | 61                      |                        | -767                    | -45                    | 105                     |
|                                    | N2 (B) | 127                     | 827                    | -700                    | 50                     | 77                      |
|                                    | O1 (B) | 117                     |                        | -710                    | 83                     | 34                      |
|                                    | O3 (C) | 82                      |                        | -745                    | 46                     | 37                      |

**Table S64.** Calculated reaction enthalpies (kJ mol<sup>-1</sup>) for the reactions of compound **q** with the selected radical species in benzene.

| <b>q</b>                           |        | HAT                     | SET-PT                 |                         | SPLET                  |                         |
|------------------------------------|--------|-------------------------|------------------------|-------------------------|------------------------|-------------------------|
| Radical                            |        | $\Delta H_{\text{BDE}}$ | $\Delta H_{\text{IP}}$ | $\Delta H_{\text{PDE}}$ | $\Delta H_{\text{PA}}$ | $\Delta H_{\text{ETE}}$ |
| ·OCH <sub>3</sub>                  | N1 (A) | -76                     |                        | -366                    | -148                   | 71                      |
|                                    | N2 (A) | -105                    |                        | -394                    | -177                   | 73                      |
|                                    | N2 (B) | -37                     | 290                    | -327                    | -76                    | 39                      |
|                                    | O1 (B) | -74                     |                        | -363                    | -98                    | 24                      |
|                                    | O3 (C) | -98                     |                        | -388                    | -78                    | -20                     |
| ·OC(CH <sub>3</sub> ) <sub>3</sub> | N1 (A) | -86                     |                        | -363                    | -145                   | 59                      |
|                                    | N2 (A) | -114                    |                        | -391                    | -174                   | 60                      |
|                                    | N2 (B) | -46                     | 277                    | -324                    | -73                    | 27                      |
|                                    | O1 (B) | -83                     |                        | -360                    | -95                    | 12                      |
|                                    | O3 (C) | -107                    |                        | -385                    | -75                    | -33                     |
| ·OH                                | N1 (A) | -145                    |                        | -387                    | -169                   | 23                      |
|                                    | N2 (A) | -173                    |                        | -415                    | -198                   | 25                      |
|                                    | N2 (B) | -106                    | 242                    | -347                    | -97                    | -9                      |
|                                    | O1 (B) | -143                    |                        | -384                    | -119                   | -24                     |
|                                    | O3 (C) | -167                    |                        | -409                    | -98                    | -68                     |
| ·OOH                               | N1 (A) | -9                      |                        | -335                    | -117                   | 108                     |
|                                    | N2 (A) | -37                     |                        | -363                    | -146                   | 109                     |
|                                    | N2 (B) | 31                      | 326                    | -295                    | -45                    | 76                      |
|                                    | O1 (B) | -6                      |                        | -332                    | -67                    | 61                      |
|                                    | O3 (C) | -30                     |                        | -356                    | -46                    | 16                      |
| ·OOCH <sub>3</sub>                 | N1 (A) | 0                       |                        | -329                    | -111                   | 111                     |
|                                    | N2 (A) | -28                     |                        | -357                    | -140                   | 113                     |
|                                    | N2 (B) | 40                      | 330                    | -290                    | -39                    | 79                      |
|                                    | O1 (B) | 3                       |                        | -327                    | -61                    | 64                      |
|                                    | O3 (C) | -21                     |                        | -351                    | -41                    | 20                      |
| ·OO-CH=CH <sub>2</sub>             | N1 (A) | -1                      |                        | -283                    | -65                    | 63                      |
|                                    | N2 (A) | -29                     |                        | -311                    | -94                    | 65                      |
|                                    | N2 (B) | 38                      | 282                    | -243                    | 7                      | 31                      |
|                                    | O1 (B) | 2                       |                        | -280                    | -15                    | 16                      |
|                                    | O3 (C) | -23                     |                        | -304                    | 6                      | -28                     |
| DPPH                               | N1 (A) | 19                      |                        | -163                    | 55                     | -36                     |
|                                    | N2 (A) | -9                      |                        | -192                    | 26                     | -35                     |
|                                    | N2 (B) | 59                      | 183                    | -124                    | 126                    | -68                     |
|                                    | O1 (B) | 22                      |                        | -161                    | 105                    | -83                     |
|                                    | O3 (C) | -2                      |                        | -185                    | 125                    | -128                    |
| O <sub>2</sub> <sup>-</sup>        | N1 (A) | 88                      |                        | -725                    | -20                    | 108                     |
|                                    | N2 (A) | 60                      |                        | -753                    | -50                    | 109                     |
|                                    | N2 (B) | 127                     | 813                    | -685                    | 51                     | 76                      |
|                                    | O1 (B) | 90                      |                        | -722                    | 30                     | 61                      |
|                                    | O3 (C) | 66                      |                        | -747                    | 50                     | 16                      |

**Table S65.** Calculated reaction enthalpies (kJ mol<sup>-1</sup>) for the reactions of compound **r** with the selected radical species in benzene.

| <b>r</b>                           |        | HAT                     | SET-PT                 |                         | SPLET                  |                         |
|------------------------------------|--------|-------------------------|------------------------|-------------------------|------------------------|-------------------------|
| Radical                            |        | $\Delta H_{\text{BDE}}$ | $\Delta H_{\text{IP}}$ | $\Delta H_{\text{PDE}}$ | $\Delta H_{\text{PA}}$ | $\Delta H_{\text{ETE}}$ |
| ·OCH <sub>3</sub>                  | N1 (A) | -75                     |                        | -360                    | -146                   | 72                      |
|                                    | N2 (A) | -102                    |                        | -387                    | -174                   | 72                      |
|                                    | N2 (B) | -39                     | 285                    | -324                    | -79                    | 40                      |
|                                    | O1 (B) | -47                     |                        | -332                    | -46                    | -2                      |
|                                    | O2 (C) | -86                     |                        | -371                    | -110                   | 24                      |
| ·OC(CH <sub>3</sub> ) <sub>3</sub> | N1 (A) | -84                     |                        | -357                    | -143                   | 59                      |
|                                    | N2 (A) | -112                    |                        | -384                    | -171                   | 60                      |
|                                    | N2 (B) | -48                     | 273                    | -321                    | -76                    | 28                      |
|                                    | O1 (B) | -57                     |                        | -329                    | -43                    | -14                     |
|                                    | O2 (C) | -95                     |                        | -368                    | -107                   | 12                      |
| ·OH                                | N1 (A) | -144                    |                        | -380                    | -167                   | 24                      |
|                                    | N2 (A) | -171                    |                        | -408                    | -195                   | 24                      |
|                                    | N2 (B) | -108                    | 237                    | -345                    | -100                   | -8                      |
|                                    | O1 (B) | -116                    |                        | -353                    | -67                    | -50                     |
|                                    | O2 (C) | -155                    |                        | -392                    | -131                   | -24                     |
| ·OOH                               | N1 (A) | -7                      |                        | -328                    | -115                   | 108                     |
|                                    | N2 (A) | -35                     |                        | -356                    | -143                   | 108                     |
|                                    | N2 (B) | 29                      | 321                    | -293                    | -48                    | 77                      |
|                                    | O1 (B) | 21                      |                        | -301                    | -14                    | 35                      |
|                                    | O2 (C) | -18                     |                        | -340                    | -79                    | 61                      |
| ·OOCH <sub>3</sub>                 | N1 (A) | 2                       |                        | -323                    | -110                   | 112                     |
|                                    | N2 (A) | -26                     |                        | -351                    | -138                   | 112                     |
|                                    | N2 (B) | 38                      | 325                    | -287                    | -42                    | 80                      |
|                                    | O1 (B) | 29                      |                        | -295                    | -9                     | 38                      |
|                                    | O2 (C) | -9                      |                        | -334                    | -74                    | 64                      |
| ·OO-CH=CH <sub>2</sub>             | N1 (A) | 0                       |                        | -276                    | -63                    | 64                      |
|                                    | N2 (A) | -27                     |                        | -304                    | -91                    | 64                      |
|                                    | N2 (B) | 36                      | 277                    | -241                    | 4                      | 32                      |
|                                    | O1 (B) | 28                      |                        | -249                    | 38                     | -10                     |
|                                    | O2 (C) | -11                     |                        | -288                    | -27                    | 16                      |
| DPPH                               | N1 (A) | 21                      |                        | -157                    | 56                     | -36                     |
|                                    | N2 (A) | -7                      |                        | -185                    | 28                     | -35                     |
|                                    | N2 (B) | 56                      | 178                    | -121                    | 123                    | -67                     |
|                                    | O1 (B) | 48                      |                        | -129                    | 157                    | -109                    |
|                                    | O2 (C) | 9                       |                        | -168                    | 92                     | -83                     |
| O <sub>2</sub> <sup>·-</sup>       | N1 (A) | 89                      |                        | -718                    | -19                    | 108                     |
|                                    | N2 (A) | 62                      |                        | -746                    | -47                    | 108                     |
|                                    | N2 (B) | 125                     | 808                    | -683                    | 48                     | 77                      |
|                                    | O1 (B) | 117                     |                        | -691                    | 82                     | 35                      |
|                                    | O2 (C) | 78                      |                        | -730                    | 17                     | 61                      |

**Table S66.** Calculated reaction enthalpies (kJ mol<sup>-1</sup>) for the reactions of compound **s** with the selected radical species in benzene.

| <b>s</b>                           |        | HAT                     | SET-PT                 |                         | SPLET                  |                         |
|------------------------------------|--------|-------------------------|------------------------|-------------------------|------------------------|-------------------------|
| Radical                            |        | $\Delta H_{\text{BDE}}$ | $\Delta H_{\text{IP}}$ | $\Delta H_{\text{PDE}}$ | $\Delta H_{\text{PA}}$ | $\Delta H_{\text{ETE}}$ |
| ·OCH <sub>3</sub>                  | N1 (A) | -76                     |                        | -357                    | -147                   | 71                      |
|                                    | N2 (A) | -104                    | 281                    | -385                    | -177                   | 72                      |
|                                    | N2 (B) | -37                     |                        | -318                    | -78                    | 41                      |
|                                    | O1 (B) | -73                     |                        | -354                    | -42                    | -31                     |
| ·OC(CH <sub>3</sub> ) <sub>3</sub> | N1 (A) | -85                     |                        | -354                    | -144                   | 59                      |
|                                    | N2 (A) | -113                    | 269                    | -382                    | -174                   | 60                      |
|                                    | N2 (B) | -46                     |                        | -315                    | -75                    | 28                      |
|                                    | O1 (B) | -82                     |                        | -351                    | -39                    | -43                     |
| ·OH                                | N1 (A) | -145                    |                        | -378                    | -168                   | 23                      |
|                                    | N2 (A) | -173                    | 233                    | -406                    | -198                   | 24                      |
|                                    | N2 (B) | -106                    |                        | -339                    | -99                    | -7                      |
|                                    | O1 (B) | -142                    |                        | -375                    | -63                    | -79                     |
| ·OOH                               | N1 (A) | -8                      |                        | -325                    | -116                   | 108                     |
|                                    | N2 (A) | -36                     | 317                    | -354                    | -145                   | 109                     |
|                                    | N2 (B) | 31                      |                        | -287                    | -47                    | 77                      |
|                                    | O1 (B) | -5                      |                        | -323                    | -11                    | 6                       |
| ·OOCH <sub>3</sub>                 | N1 (A) | 1                       |                        | -320                    | -110                   | 111                     |
|                                    | N2 (A) | -27                     | 321                    | -348                    | -140                   | 113                     |
|                                    | N2 (B) | 40                      |                        | -281                    | -41                    | 81                      |
|                                    | O1 (B) | 4                       |                        | -317                    | -6                     | 9                       |
| ·OO-CH=CH <sub>2</sub>             | N1 (A) | -1                      |                        | -273                    | -64                    | 63                      |
|                                    | N2 (A) | -29                     | 273                    | -302                    | -93                    | 64                      |
|                                    | N2 (B) | 38                      |                        | -235                    | 5                      | 33                      |
|                                    | O1 (B) | 2                       |                        | -271                    | 41                     | -39                     |
| DPPH                               | N1 (A) | 20                      |                        | -154                    | 56                     | -36                     |
|                                    | N2 (A) | -9                      | 174                    | -182                    | 26                     | -35                     |
|                                    | N2 (B) | 58                      |                        | -115                    | 125                    | -66                     |
|                                    | O1 (B) | 22                      |                        | -151                    | 160                    | -138                    |
| O <sub>2</sub> <sup>-</sup>        | N1 (A) | 88                      |                        | -716                    | -20                    | 108                     |
|                                    | N2 (A) | 60                      | 804                    | -744                    | -49                    | 109                     |
|                                    | N2 (B) | 127                     |                        | -677                    | 50                     | 77                      |
|                                    | O1 (B) | 91                      |                        | -713                    | 85                     | 6                       |



**Table S67.** Calculated reaction enthalpies (kJ mol<sup>-1</sup>) for the reactions of compound **t** with the selected radical species in benzene.

| <b>t</b>                           |        | HAT                     | SET-PT                 |                         | SPLET                  |                         |
|------------------------------------|--------|-------------------------|------------------------|-------------------------|------------------------|-------------------------|
| Radical                            |        | $\Delta H_{\text{BDE}}$ | $\Delta H_{\text{IP}}$ | $\Delta H_{\text{PDE}}$ | $\Delta H_{\text{PA}}$ | $\Delta H_{\text{ETE}}$ |
| ·OCH <sub>3</sub>                  | N1 (A) | -73                     |                        | -360                    | -152                   | 79                      |
|                                    | N2 (A) | -100                    |                        | -387                    | -180                   | 79                      |
|                                    | N2 (B) | -35                     | 286                    | -321                    | -80                    | 45                      |
|                                    | O1 (B) | -75                     |                        | -362                    | -98                    | 23                      |
|                                    | O1 (C) | -81                     |                        | -367                    | -160                   | 79                      |
| ·OC(CH <sub>3</sub> ) <sub>3</sub> | N1 (A) | -83                     |                        | -357                    | -149                   | 67                      |
|                                    | N2 (A) | -110                    |                        | -384                    | -177                   | 67                      |
|                                    | N2 (B) | -44                     | 274                    | -318                    | -77                    | 33                      |
|                                    | O1 (B) | -84                     |                        | -359                    | -95                    | 11                      |
|                                    | O1 (C) | -90                     |                        | -364                    | -157                   | 67                      |
| ·OH                                | N1 (A) | -142                    |                        | -381                    | -173                   | 31                      |
|                                    | N2 (A) | -169                    |                        | -408                    | -200                   | 31                      |
|                                    | N2 (B) | -104                    | 238                    | -342                    | -101                   | -3                      |
|                                    | O1 (B) | -144                    |                        | -382                    | -119                   | -25                     |
|                                    | O1 (C) | -150                    |                        | -388                    | -181                   | 31                      |
| ·OOH                               | N1 (A) | -5                      |                        | -328                    | -121                   | 115                     |
|                                    | N2 (A) | -33                     |                        | -355                    | -148                   | 116                     |
|                                    | N2 (B) | 33                      | 323                    | -290                    | -48                    | 82                      |
|                                    | O1 (B) | -7                      |                        | -330                    | -67                    | 60                      |
|                                    | O1 (C) | -13                     |                        | -336                    | -129                   | 116                     |
| ·OOCH <sub>3</sub>                 | N1 (A) | 3                       |                        | -323                    | -115                   | 119                     |
|                                    | N2 (A) | -24                     |                        | -350                    | -143                   | 119                     |
|                                    | N2 (B) | 42                      | 326                    | -284                    | -43                    | 85                      |
|                                    | O1 (B) | 2                       |                        | -325                    | -62                    | 63                      |
|                                    | O1 (C) | -4                      |                        | -330                    | -123                   | 119                     |
| ·OO-CH=CH <sub>2</sub>             | N1 (A) | 2                       |                        | -276                    | -69                    | 71                      |
|                                    | N2 (A) | -25                     |                        | -304                    | -96                    | 71                      |
|                                    | N2 (B) | 40                      | 278                    | -238                    | 4                      | 37                      |
|                                    | O1 (B) | 0                       |                        | -278                    | -15                    | 15                      |
|                                    | O1 (C) | -6                      |                        | -284                    | -77                    | 71                      |
| DPPH                               | N1 (A) | 22                      |                        | -157                    | 51                     | -28                     |
|                                    | N2 (A) | -5                      |                        | -184                    | 23                     | -28                     |
|                                    | N2 (B) | 61                      | 179                    | -118                    | 123                    | -62                     |
|                                    | O1 (B) | 20                      |                        | -159                    | 104                    | -84                     |
|                                    | O1 (C) | 15                      |                        | -165                    | 42                     | -28                     |
| O <sub>2</sub> <sup>·-</sup>       | N1 (A) | 91                      |                        | -719                    | -25                    | 115                     |
|                                    | N2 (A) | 64                      |                        | -746                    | -52                    | 116                     |
|                                    | N2 (B) | 129                     | 809                    | -680                    | 48                     | 82                      |
|                                    | O1 (B) | 89                      |                        | -720                    | 29                     | 60                      |
|                                    | O1 (C) | 83                      |                        | -726                    | -33                    | 116                     |

**Table S68.** Calculated Fukui function values for the radical attack ( $f_{\text{nbo}}^0$ ) on the selected positions and  $\Delta H_{\text{RAF}}$  values ( $\text{kJ mol}^{-1}$ ) for compound **a**.

| Atom | Number | $f_{\text{nbo}}^0$ | $\Delta H_{\text{RAF}}$<br>(methanol) | $\Delta H_{\text{RAF}}$<br>(benzene) |
|------|--------|--------------------|---------------------------------------|--------------------------------------|
| C    | 20     | 0.111              | -90                                   | -97                                  |
| O    | 27     | 0.101              | /                                     | /                                    |
| N    | 32     | 0.074              | /                                     | /                                    |
| C    | 10     | 0.073              | -57                                   | -58                                  |
| C    | 11     | 0.067              | -66                                   | -65                                  |
| C    | 26     | 0.065              | -54                                   | -35                                  |
| O    | 30     | 0.062              | /                                     | /                                    |
| N    | 28     | 0.060              | /                                     | /                                    |

**Table S69.** Calculated Fukui function values for the radical attack ( $f_{\text{nbo}}^0$ ) on the selected positions and  $\Delta H_{\text{RAF}}$  values ( $\text{kJ mol}^{-1}$ ) for compound **b**.

| Atom | Number | $f_{\text{nbo}}^0$ | $\Delta H_{\text{RAF}}$<br>(methanol) | $\Delta H_{\text{RAF}}$<br>(benzene) |
|------|--------|--------------------|---------------------------------------|--------------------------------------|
| C    | 19     | 0.102              | -89                                   | -85                                  |
| O    | 26     | 0.081              | /                                     | /                                    |
| N    | 31     | 0.068              | /                                     | /                                    |
| C    | 10     | 0.057              | -66                                   | -67                                  |
| O    | 29     | 0.054              | /                                     | /                                    |

**Table S70.** Calculated Fukui function values for the radical attack ( $f_{\text{nbo}}^0$ ) on the selected positions and  $\Delta H_{\text{RAF}}$  values ( $\text{kJ mol}^{-1}$ ) for compound **c**.

| Atom | Number | $f_{\text{nbo}}^0$ | $\Delta H_{\text{RAF}}$<br>(methanol) | $\Delta H_{\text{RAF}}$<br>(benzene) |
|------|--------|--------------------|---------------------------------------|--------------------------------------|
| C    | 20     | 0.111              | -89                                   | -97                                  |
| O    | 27     | 0.101              | /                                     | /                                    |
| N    | 32     | 0.074              | /                                     | /                                    |
| C    | 10     | 0.073              | -56                                   | -59                                  |
| C    | 11     | 0.067              | -65                                   | -65                                  |
| O    | 30     | 0.062              | /                                     | /                                    |
| C    | 26     | 0.061              | -58                                   | -38                                  |
| N    | 28     | 0.059              | /                                     | /                                    |

**Table S71.** Calculated Fukui function values for the radical attack ( $f_{\text{nbo}}^0$ ) on the selected positions and  $\Delta H_{\text{RAF}}$  values ( $\text{kJ mol}^{-1}$ ) for compound **d**.

| Atom | Number | $f_{\text{nbo}}^0$ | $\Delta H_{\text{RAF}}$<br>(methanol) | $\Delta H_{\text{RAF}}$<br>(benzene) |
|------|--------|--------------------|---------------------------------------|--------------------------------------|
| C    | 20     | 0.089              | -90                                   | -97                                  |
| N    | 32     | 0.089              | /                                     | /                                    |
| O    | 27     | 0.086              | /                                     | /                                    |
| C    | 11     | 0.076              | -66                                   | -67                                  |
| C    | 10     | 0.076              | -58                                   | -58                                  |

**Table S72.** Calculated Fukui function values for the radical attack ( $f_{\text{nbo}}^0$ ) on the selected positions and  $\Delta H_{\text{RAF}}$  values ( $\text{kJ mol}^{-1}$ ) for compound **e**.

| Atom | Number | $f_{\text{nbo}}^0$ | $\Delta H_{\text{RAF}}$<br>(methanol) | $\Delta H_{\text{RAF}}$<br>(benzene) |
|------|--------|--------------------|---------------------------------------|--------------------------------------|
| O    | 26     | 0.076              | /                                     | /                                    |
| C    | 9      | 0.071              | -57                                   | -56                                  |
| C    | 3      | 0.068              | -77                                   | -75                                  |
| C    | 35     | 0.066              | -62                                   | -55                                  |
| C    | 19     | 0.062              | -89                                   | -96                                  |
| O    | 29     | 0.061              | /                                     | /                                    |
| N    | 27     | 0.059              | /                                     | /                                    |
| C    | 1      | 0.058              | -72                                   | -71                                  |
| N    | 31     | 0.055              | /                                     | /                                    |
| C    | 10     | 0.055              | -65                                   | -65                                  |

**Table S73.** Calculated Fukui function values for the radical attack ( $f_{\text{nbo}}^0$ ) on the selected positions and  $\Delta H_{\text{RAF}}$  values ( $\text{kJ mol}^{-1}$ ) for compound **f**.

| Atom | Number | $f_{\text{nbo}}^0$ | $\Delta H_{\text{RAF}}$<br>(methanol) | $\Delta H_{\text{RAF}}$<br>(benzene) |
|------|--------|--------------------|---------------------------------------|--------------------------------------|
| C    | 2      | 0.085              | -68                                   | -66                                  |
| C    | 1      | 0.077              | -69                                   | -66                                  |
| O    | 27     | 0.075              | /                                     | /                                    |
| C    | 10     | 0.073              | -56                                   | -99                                  |
| O    | 30     | 0.060              | /                                     | /                                    |
| C    | 20     | 0.058              | -90                                   | -96                                  |
| N    | 28     | 0.058              | /                                     | /                                    |

**Table S74.** Calculated Fukui function values for the radical attack ( $f_{\text{nbo}}^0$ ) on the selected positions and  $\Delta H_{\text{RAF}}$  values ( $\text{kJ mol}^{-1}$ ) for compound **g**.

| Atom | Number | $f_{\text{nbo}}^0$ | $\Delta H_{\text{RAF}}$<br>(methanol) | $\Delta H_{\text{RAF}}$<br>(benzene) |
|------|--------|--------------------|---------------------------------------|--------------------------------------|
| O    | 27     | 0.075              | /                                     | /                                    |
| C    | 2      | 0.075              | -66                                   | -61                                  |
| C    | 10     | 0.073              | -57                                   | -99                                  |
| C    | 1      | 0.068              | -58                                   | -66                                  |
| C    | 35     | 0.064              | -64                                   | -60                                  |
| O    | 30     | 0.061              | /                                     | /                                    |
| C    | 20     | 0.060              | -90                                   | -97                                  |
| N    | 28     | 0.058              | /                                     | /                                    |
| C    | 3      | 0.058              | -70                                   | -67                                  |
| C    | 11     | 0.055              | -65                                   | -66                                  |

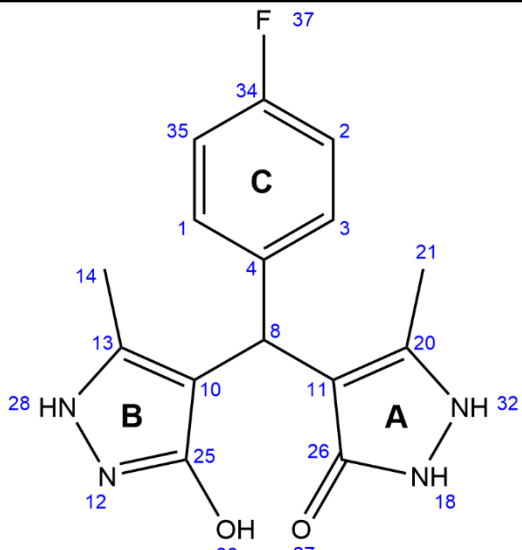

**Table S75.** Calculated Fukui function values for the radical attack ( $f_{\text{nbo}}^0$ ) on the selected positions and  $\Delta H_{\text{RAF}}$  values ( $\text{kJ mol}^{-1}$ ) for compound **h**.

| Atom | Number | $f_{\text{nbo}}^0$ | $\Delta H_{\text{RAF}}$<br>(methanol) | $\Delta H_{\text{RAF}}$<br>(benzene) |
|------|--------|--------------------|---------------------------------------|--------------------------------------|
| C    | 9      | 0.069              | -40                                   | -42                                  |
| O    | 29     | 0.065              | /                                     | /                                    |
| N    | 27     | 0.061              | /                                     | /                                    |
| O    | 26     | 0.054              | /                                     | /                                    |

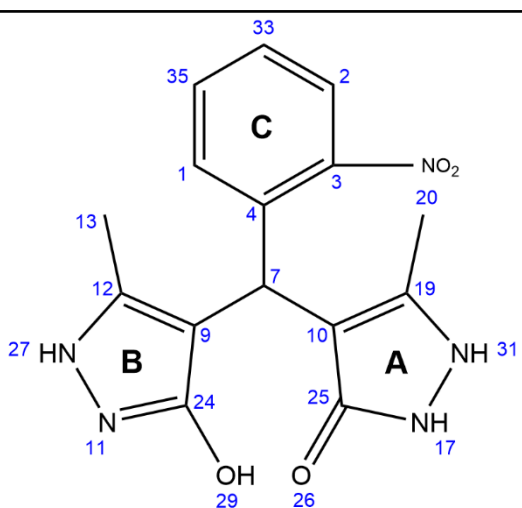

**Table S76.** Calculated Fukui function values for the radical attack ( $f_{\text{nbo}}^0$ ) on the selected positions and  $\Delta H_{\text{RAF}}$  values ( $\text{kJ mol}^{-1}$ ) for compound **i**.

| Atom | Number | $f_{\text{nbo}}^0$ | $\Delta H_{\text{RAF}}$<br>(methanol) | $\Delta H_{\text{RAF}}$<br>(benzene) |
|------|--------|--------------------|---------------------------------------|--------------------------------------|
| C    | 10     | 0.071              | -102                                  | -57                                  |
| O    | 30     | 0.061              | /                                     | /                                    |
| N    | 28     | 0.059              | /                                     | /                                    |

  

**Table S77.** Calculated Fukui function values for the radical attack ( $f_{\text{nbo}}^0$ ) on the selected positions and  $\Delta H_{\text{RAF}}$  values ( $\text{kJ mol}^{-1}$ ) for compound **j**.

| Atom | Number | $f_{\text{nbo}}^0$ | $\Delta H_{\text{RAF}}$<br>(methanol) | $\Delta H_{\text{RAF}}$<br>(benzene) |
|------|--------|--------------------|---------------------------------------|--------------------------------------|
| C    | 10     | 0.071              | -100                                  | -57                                  |
| O    | 30     | 0.058              | /                                     | /                                    |
| N    | 28     | 0.056              | /                                     | /                                    |
| O    | 27     | 0.056              | /                                     | /                                    |

**Table S78.** Calculated Fukui function values for the radical attack ( $f_{\text{nbo}}^0$ ) on the selected positions and  $\Delta H_{\text{RAF}}$  values ( $\text{kJ mol}^{-1}$ ) for compound **k**.

| Atom | Number | $f_{\text{nbo}}^0$ | $\Delta H_{\text{RAF}}$<br>(methanol) | $\Delta H_{\text{RAF}}$<br>(benzene) |
|------|--------|--------------------|---------------------------------------|--------------------------------------|
| C    | 19     | 0.122              | -88                                   | -98                                  |
| O    | 26     | 0.110              | /                                     | /                                    |
| N    | 31     | 0.082              | /                                     | /                                    |
| C    | 10     | 0.076              | -57                                   | -57                                  |
| C    | 25     | 0.070              | -57                                   | -39                                  |
| C    | 9      | 0.067              | -52                                   | -53                                  |

**Table S79.** Calculated Fukui function values for the radical attack ( $f_{\text{nbo}}^0$ ) on the selected positions and  $\Delta H_{\text{RAF}}$  values ( $\text{kJ mol}^{-1}$ ) for compound **l**.

| Atom | Number | $f_{\text{nbo}}^0$ | $\Delta H_{\text{RAF}}$<br>(methanol) | $\Delta H_{\text{RAF}}$<br>(benzene) |
|------|--------|--------------------|---------------------------------------|--------------------------------------|
| C    | 20     | 0.109              | -90                                   | -98                                  |
| O    | 27     | 0.102              | /                                     | /                                    |
| C    | 10     | 0.075              | -57                                   | -58                                  |
| N    | 32     | 0.074              | /                                     | /                                    |
| C    | 11     | 0.067              | -66                                   | -66                                  |
| C    | 26     | 0.061              | -54                                   | -34                                  |
| O    | 30     | 0.061              | /                                     | /                                    |
| N    | 28     | 0.059              | /                                     | /                                    |

**Table S80.** Calculated Fukui function values for the radical attack ( $f_{\text{nbo}}^0$ ) on the selected positions and  $\Delta H_{\text{RAF}}$  values ( $\text{kJ mol}^{-1}$ ) for compound **m**.

| Atom | Number | $f_{\text{nbo}}^0$ | $\Delta H_{\text{RAF}}$<br>(methanol) | $\Delta H_{\text{RAF}}$<br>(benzene) |
|------|--------|--------------------|---------------------------------------|--------------------------------------|
| C    | 19     | 0.115              | -87                                   | -95                                  |
| C    | 2      | 0.080              | -70                                   | -64                                  |
| C    | 25     | 0.071              | -56                                   | -40                                  |
| C    | 1      | 0.070              | -84                                   | -78                                  |
| O    | 36     | 0.063              | /                                     | /                                    |
| C    | 35     | 0.061              | -84                                   | -89                                  |
| O    | 26     | 0.060              | /                                     | /                                    |

**Table S81.** Calculated Fukui function values for the radical attack ( $f_{\text{nbo}}^0$ ) on the selected positions and  $\Delta H_{\text{RAF}}$  values ( $\text{kJ mol}^{-1}$ ) for compound **n**.

| Atom | Number | $f_{\text{nbo}}^0$ | $\Delta H_{\text{RAF}}$<br>(methanol) | $\Delta H_{\text{RAF}}$<br>(benzene) |
|------|--------|--------------------|---------------------------------------|--------------------------------------|
| C    | 22     | 0.105              | -90                                   | -98                                  |
| C    | 3      | 0.075              | -88                                   | -92                                  |
| C    | 6      | 0.071              | -75                                   | -75                                  |
| C    | 5      | 0.070              | -75                                   | -73                                  |
| C    | 28     | 0.065              | -53                                   | -37                                  |
| O    | 32     | 0.062              | /                                     | /                                    |
| C    | 2      | 0.060              | -90                                   | -80                                  |
| O    | 29     | 0.058              | /                                     | /                                    |
| O    | 30     | 0.057              | /                                     | /                                    |



**Table S82.** Calculated Fukui function values for the radical attack ( $f_{\text{nbo}}^0$ ) on the selected positions and  $\Delta H_{\text{RAF}}$  values ( $\text{kJ mol}^{-1}$ ) for compound **o**.

| Atom | Number | $f_{\text{nbo}}^0$ | $\Delta H_{\text{RAF}}$<br>(methanol) | $\Delta H_{\text{RAF}}$<br>(benzene) |
|------|--------|--------------------|---------------------------------------|--------------------------------------|
| C    | 18     | 0.112              | -88                                   | -86                                  |
| C    | 34     | 0.079              | -71                                   | -63                                  |
| C    | 1      | 0.071              | -68                                   | -68                                  |
| C    | 3      | 0.070              | -88                                   | -80                                  |
| C    | 2      | 0.066              | -81                                   | -82                                  |
| O    | 36     | 0.063              | /                                     | /                                    |
| O    | 38     | 0.061              | /                                     | /                                    |
| C    | 24     | 0.061              | -63                                   | -42                                  |

**Table S83.** Calculated Fukui function values for the radical attack ( $f_{\text{nbo}}^0$ ) on the selected positions and  $\Delta H_{\text{RAF}}$  values ( $\text{kJ mol}^{-1}$ ) for compound **p**.

| Atom | Number | $f_{\text{nbo}}^0$ | $\Delta H_{\text{RAF}}$<br>(methanol) | $\Delta H_{\text{RAF}}$<br>(benzene) |
|------|--------|--------------------|---------------------------------------|--------------------------------------|
| C    | 20     | 0.108              | -91                                   | -97                                  |
| C    | 4      | 0.075              | -79                                   | -74                                  |
| C    | 34     | 0.074              | -95                                   | -85                                  |
| C    | 26     | 0.067              | -56                                   | -30                                  |
| O    | 36     | 0.066              | /                                     | /                                    |
| C    | 3      | 0.063              | -76                                   | -72                                  |
| O    | 27     | 0.058              | /                                     | /                                    |
| C    | 35     | 0.056              | -84                                   | -79                                  |
| O    | 38     | 0.055              | /                                     | /                                    |

**Table S84.** Calculated Fukui function values for the radical attack ( $f_{\text{nbo}}^0$ ) on the selected positions and  $\Delta H_{\text{RAF}}$  values ( $\text{kJ mol}^{-1}$ ) for compound **q**.

| Atom | Number | $f_{\text{nbo}}^0$ | $\Delta H_{\text{RAF}}$<br>(methanol) | $\Delta H_{\text{RAF}}$<br>(benzene) |
|------|--------|--------------------|---------------------------------------|--------------------------------------|
| C    | 19     | 0.112              | -91                                   | -98                                  |
| C    | 33     | 0.089              | -106                                  | -103                                 |
| O    | 36     | 0.072              | /                                     | /                                    |
| C    | 25     | 0.071              | -54                                   | -38                                  |
| C    | 3      | 0.061              | -71                                   | -71                                  |
| O    | 26     | 0.061              | /                                     | /                                    |

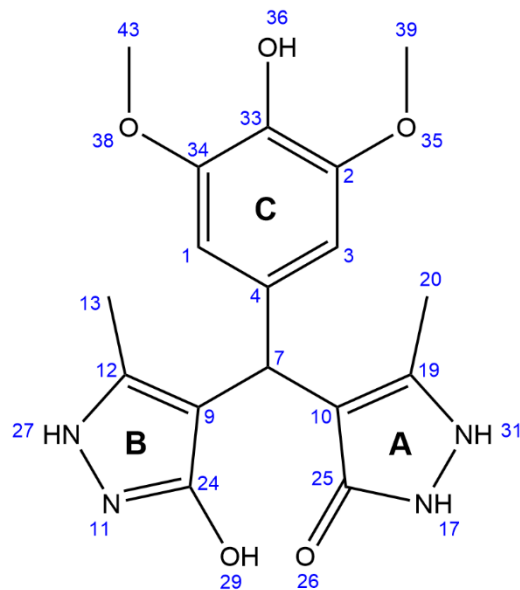

**Table S85.** Calculated Fukui function values for the radical attack ( $f_{\text{nbo}}^0$ ) on the selected positions and  $\Delta H_{\text{RAF}}$  values ( $\text{kJ mol}^{-1}$ ) for compound **r**.

| Atom | Number | $f_{\text{nbo}}^0$ | $\Delta H_{\text{RAF}}$<br>(methanol) | $\Delta H_{\text{RAF}}$<br>(benzene) |
|------|--------|--------------------|---------------------------------------|--------------------------------------|
| C    | 17     | 0.119              | -90                                   | -97                                  |
| O    | 24     | 0.104              | /                                     | /                                    |
| N    | 29     | 0.076              | /                                     | /                                    |
| C    | 7      | 0.072              | -57                                   | -55                                  |
| C    | 8      | 0.068              | -66                                   | -67                                  |
| C    | 23     | 0.068              | -56                                   | -30                                  |
| O    | 27     | 0.059              | /                                     | /                                    |
| N    | 25     | 0.058              | /                                     | /                                    |

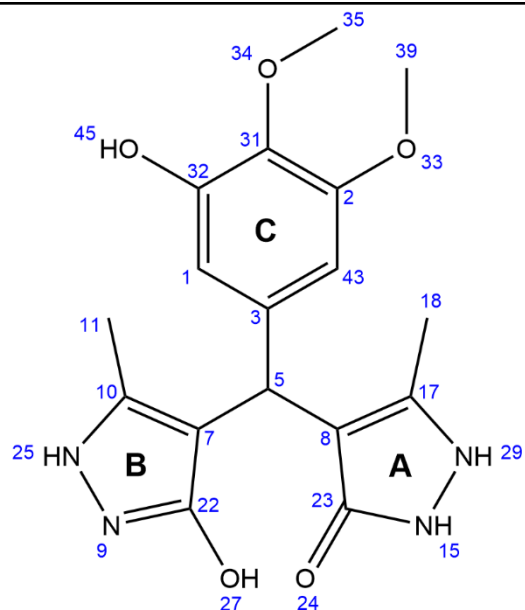

**Table S86.** Calculated Fukui function values for the radical attack ( $f_{\text{nbo}}^0$ ) on the selected positions and  $\Delta H_{\text{RAF}}$  values ( $\text{kJ mol}^{-1}$ ) for compound **s**.

| Atom | Number | $f_{\text{nbo}}^0$ | $\Delta H_{\text{RAF}}$<br>(methanol) | $\Delta H_{\text{RAF}}$<br>(benzene) |
|------|--------|--------------------|---------------------------------------|--------------------------------------|
| C    | 19     | 0.115              | -87                                   | -98                                  |
| O    | 26     | 0.103              | /                                     | /                                    |
| N    | 31     | 0.101              | /                                     | /                                    |
| C    | 10     | 0.066              | -66                                   | -69                                  |
| C    | 25     | 0.062              | -54                                   | -36                                  |
| N    | 17     | 0.057              | /                                     | /                                    |
| C    | 9      | 0.056              | -57                                   | -59                                  |

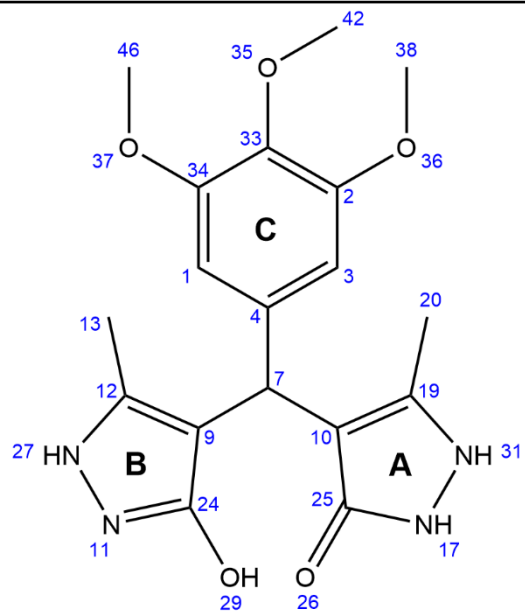

**Table S87.** Calculated Fukui function values for the radical attack ( $f_{\text{nbo}}^0$ ) on the selected positions and  $\Delta H_{\text{RAF}}$  values ( $\text{kJ mol}^{-1}$ ) for compound **t**.

| Atom | Number | $f_{\text{nbo}}^0$ | $\Delta H_{\text{RAF}}$<br>(methanol) | $\Delta H_{\text{RAF}}$<br>(benzene) |
|------|--------|--------------------|---------------------------------------|--------------------------------------|
| C    | 32     | 0.106              | -77                                   | -72                                  |
| C    | 1      | 0.075              | -71                                   | -66                                  |
| O    | 28     | 0.068              | /                                     | /                                    |
| C    | 4      | 0.066              | -85                                   | -77                                  |
| C    | 8      | 0.062              | -55                                   | -56                                  |
| N    | 26     | 0.060              | /                                     | /                                    |
| O    | 25     | 0.058              | /                                     | /                                    |

  

**Table S88.** Regression equations parameters calculated by DPPH assay for compounds **a–t** and parent pyrazolone.

| Analogue | Regression equation    | Corelation coefficient (r) |
|----------|------------------------|----------------------------|
| <b>a</b> | $y = 7.4716x + 11.814$ | 0.9933                     |
| <b>b</b> | $y = 5.1045x + 18.599$ | 0.9769                     |
| <b>c</b> | $y = 7.1268x + 19.769$ | 0.9622                     |
| <b>d</b> | $y = 8.8059x + 7.396$  | 0.9943                     |
| <b>e</b> | $y = 4.9523x + 27.897$ | 0.9839                     |
| <b>f</b> | $y = 5.7368x + 19.343$ | 0.9862                     |
| <b>g</b> | $y = 8.9619x + 6.8912$ | 0.9821                     |
| <b>h</b> | $y = 3.848x + 19.901$  | 0.9866                     |
| <b>i</b> | $y = 6.2356x + 22.023$ | 0.9800                     |
| <b>j</b> | $y = 3.4101x + 32.596$ | 0.9909                     |
| <b>k</b> | $y = 8.7339x + 13.068$ | 0.9472                     |
| <b>l</b> | $y = 7.8414x + 22.555$ | 0.9786                     |
| <b>m</b> | $y = 18.958x - 0.1678$ | 0.9939                     |
| <b>n</b> | $y = 17.47x - 1.2657$  | 0.9981                     |
| <b>o</b> | $y = 11.755x + 7.5286$ | 0.9966                     |
| <b>p</b> | $y = 7.5674x + 4.1716$ | 0.9988                     |
| <b>q</b> | $y = 7.7734x + 6.7145$ | 0.9853                     |

|                   |                        |        |
|-------------------|------------------------|--------|
| <b>r</b>          | $y = 6.5257x + 21.87$  | 0.9760 |
| <b>s</b>          | $y = 6.4569x + 9.9444$ | 0.9846 |
| <b>t</b>          | $y = 5.4435x + 14.961$ | 0.9631 |
| <b>Pyrazolone</b> | $y = 2.5555x + 26.289$ | 0.9811 |

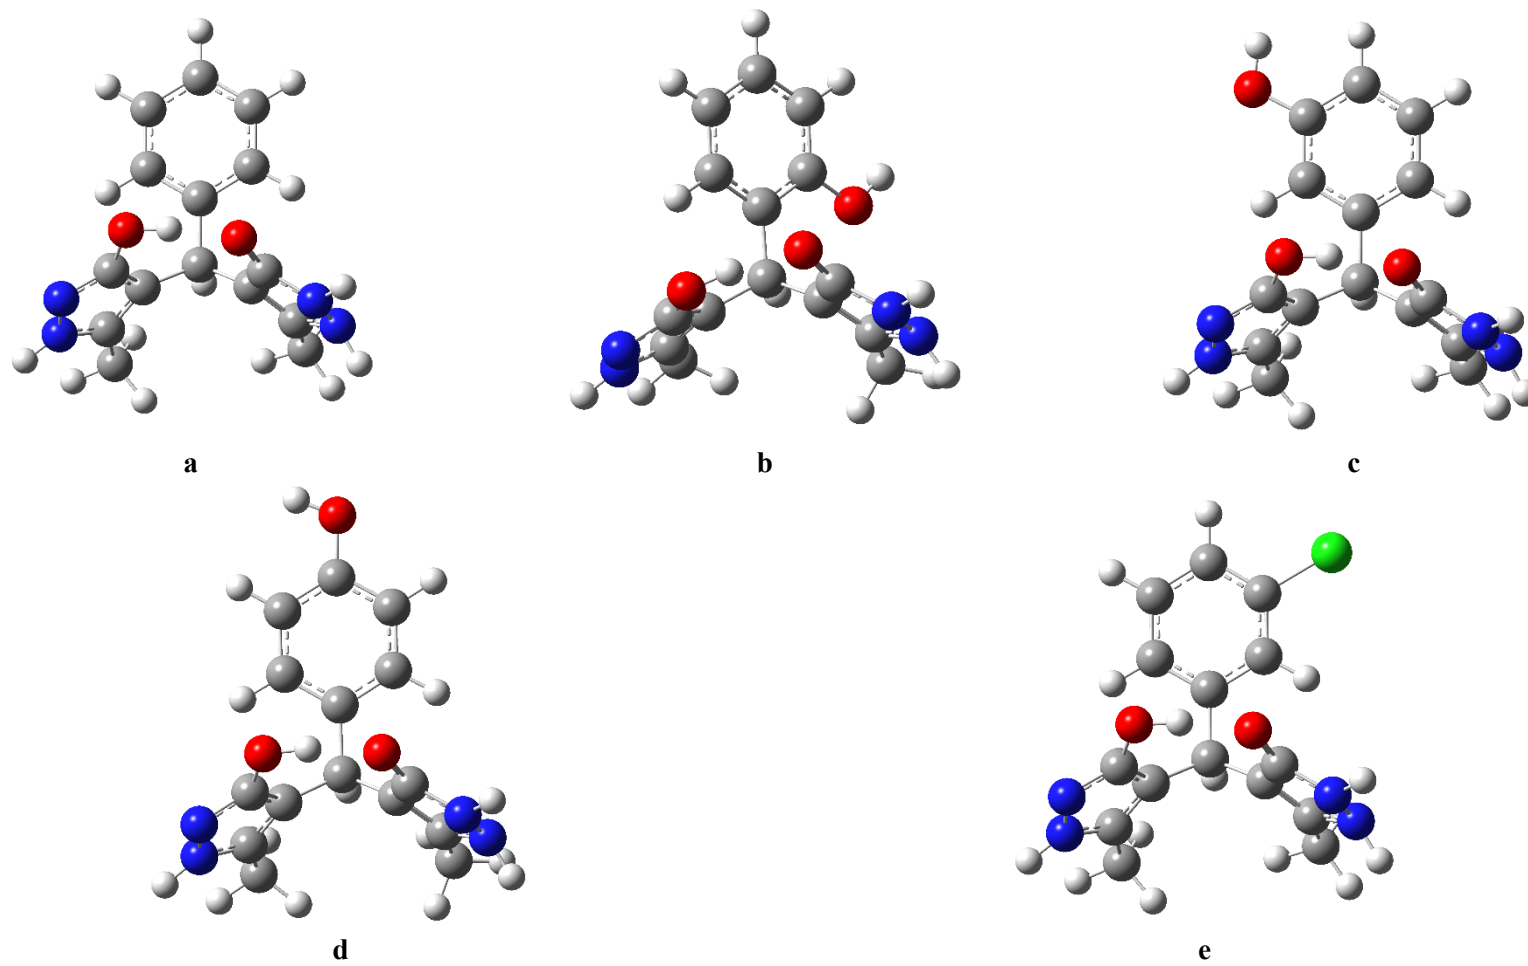

**Figure S1.** Optimized geometries of compounds **a–e** in methanol.

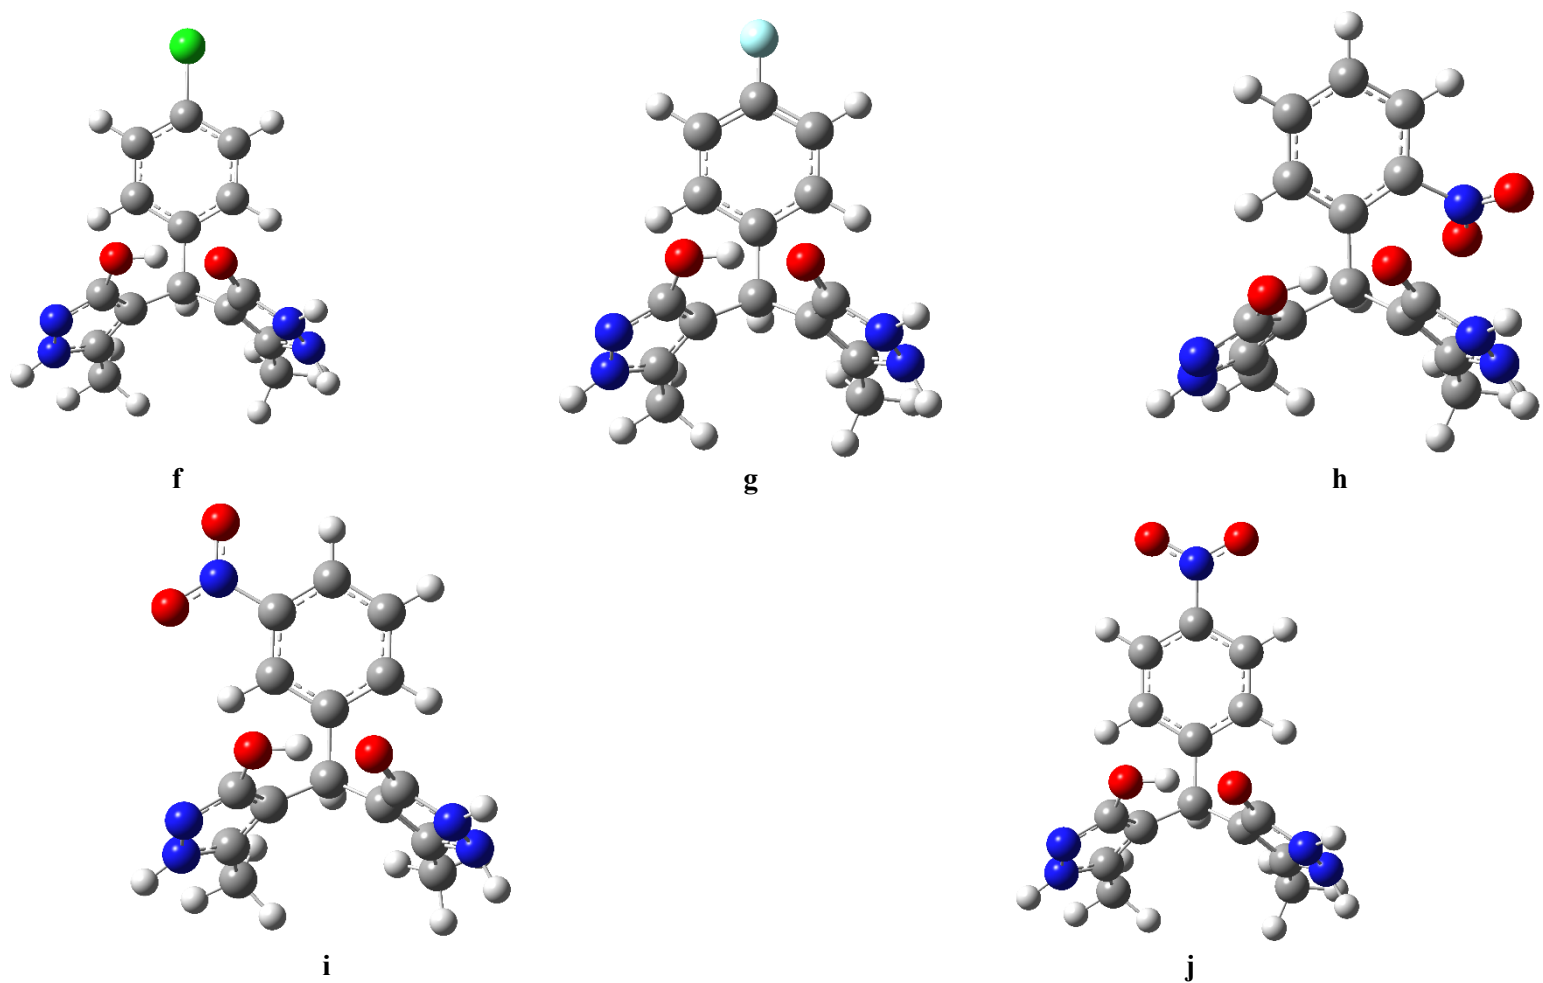

**Figure S2.** Optimized geometries of compounds **f–j** in methanol.

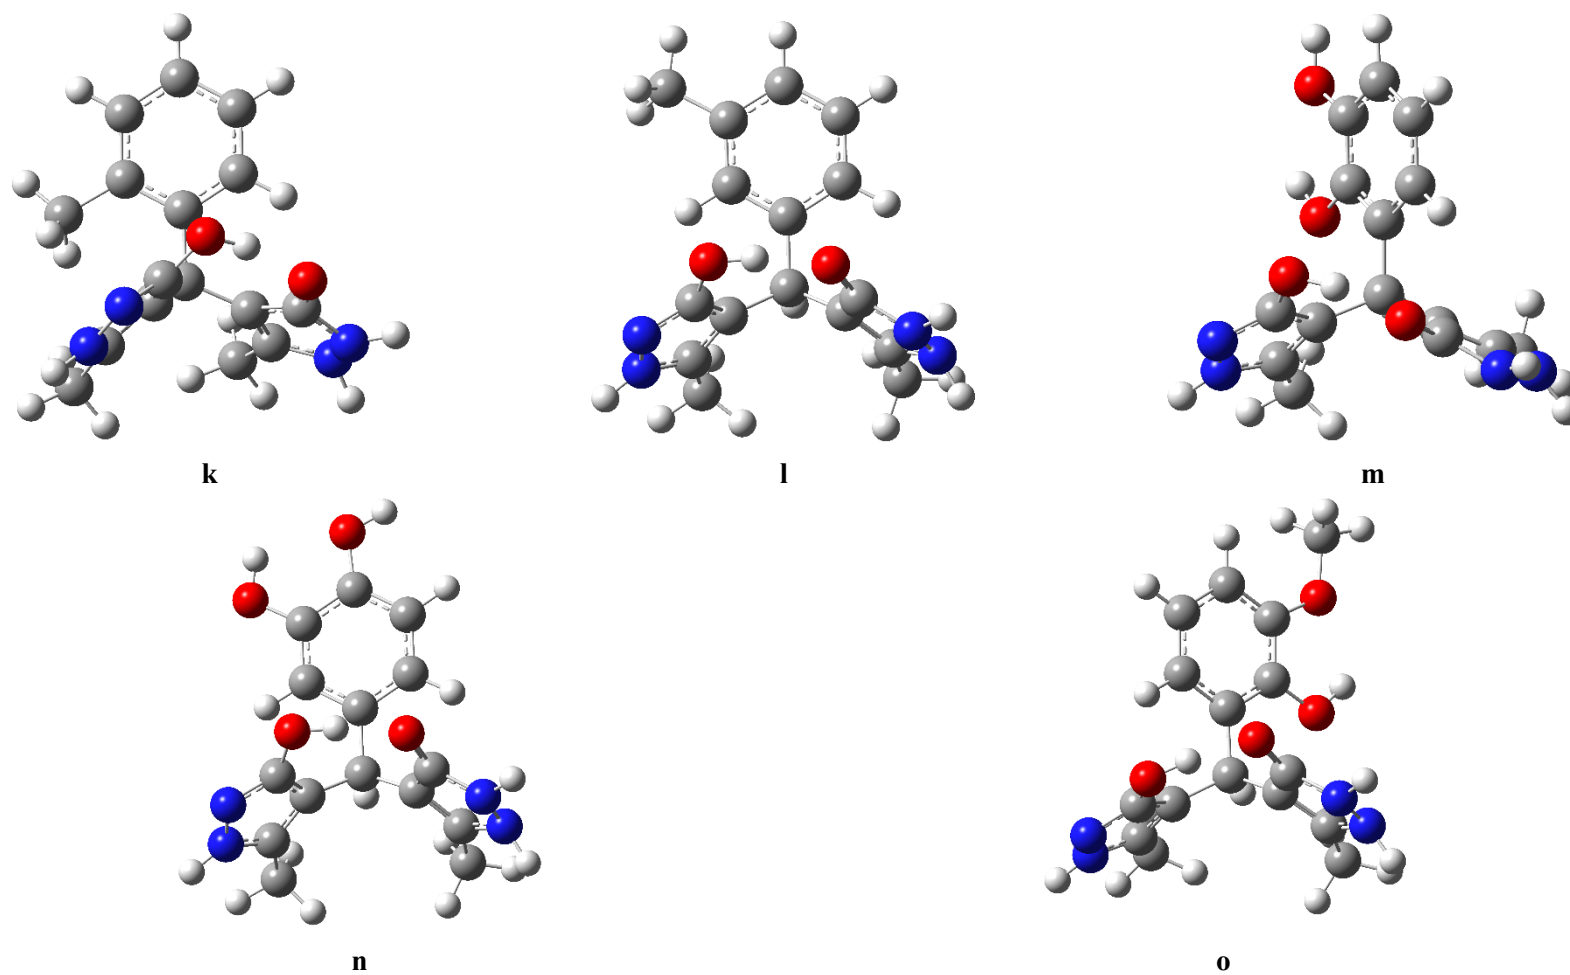

**Figure S3.** Optimized geometries of compounds **k–o** in methanol.



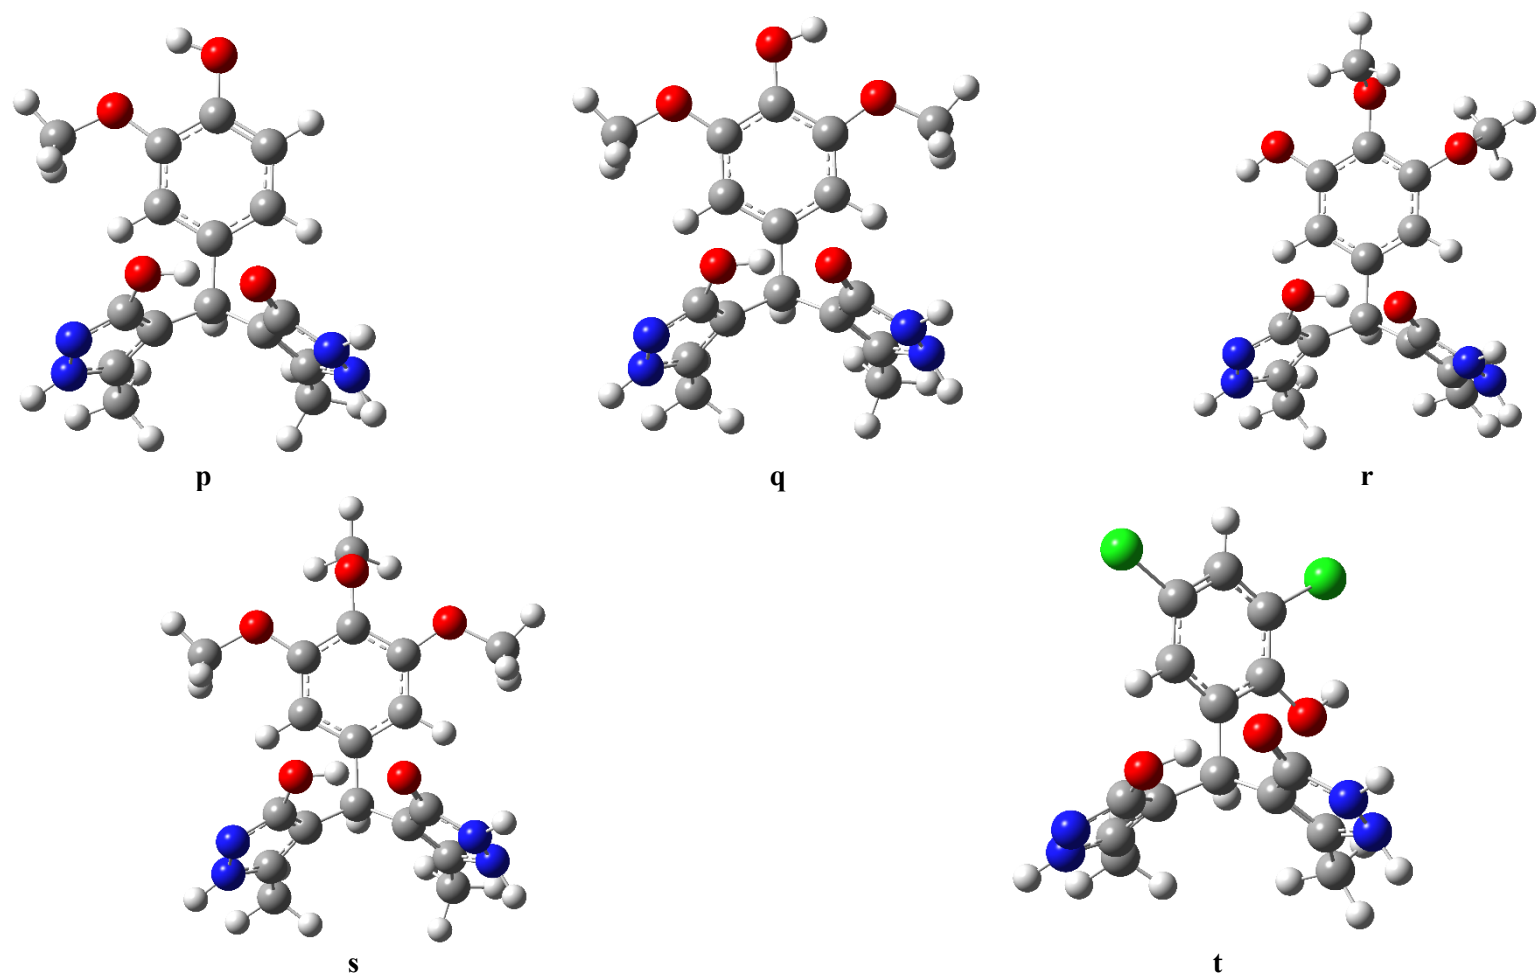

**Figure S4.** Optimized geometries of compounds **p–t** in methanol.

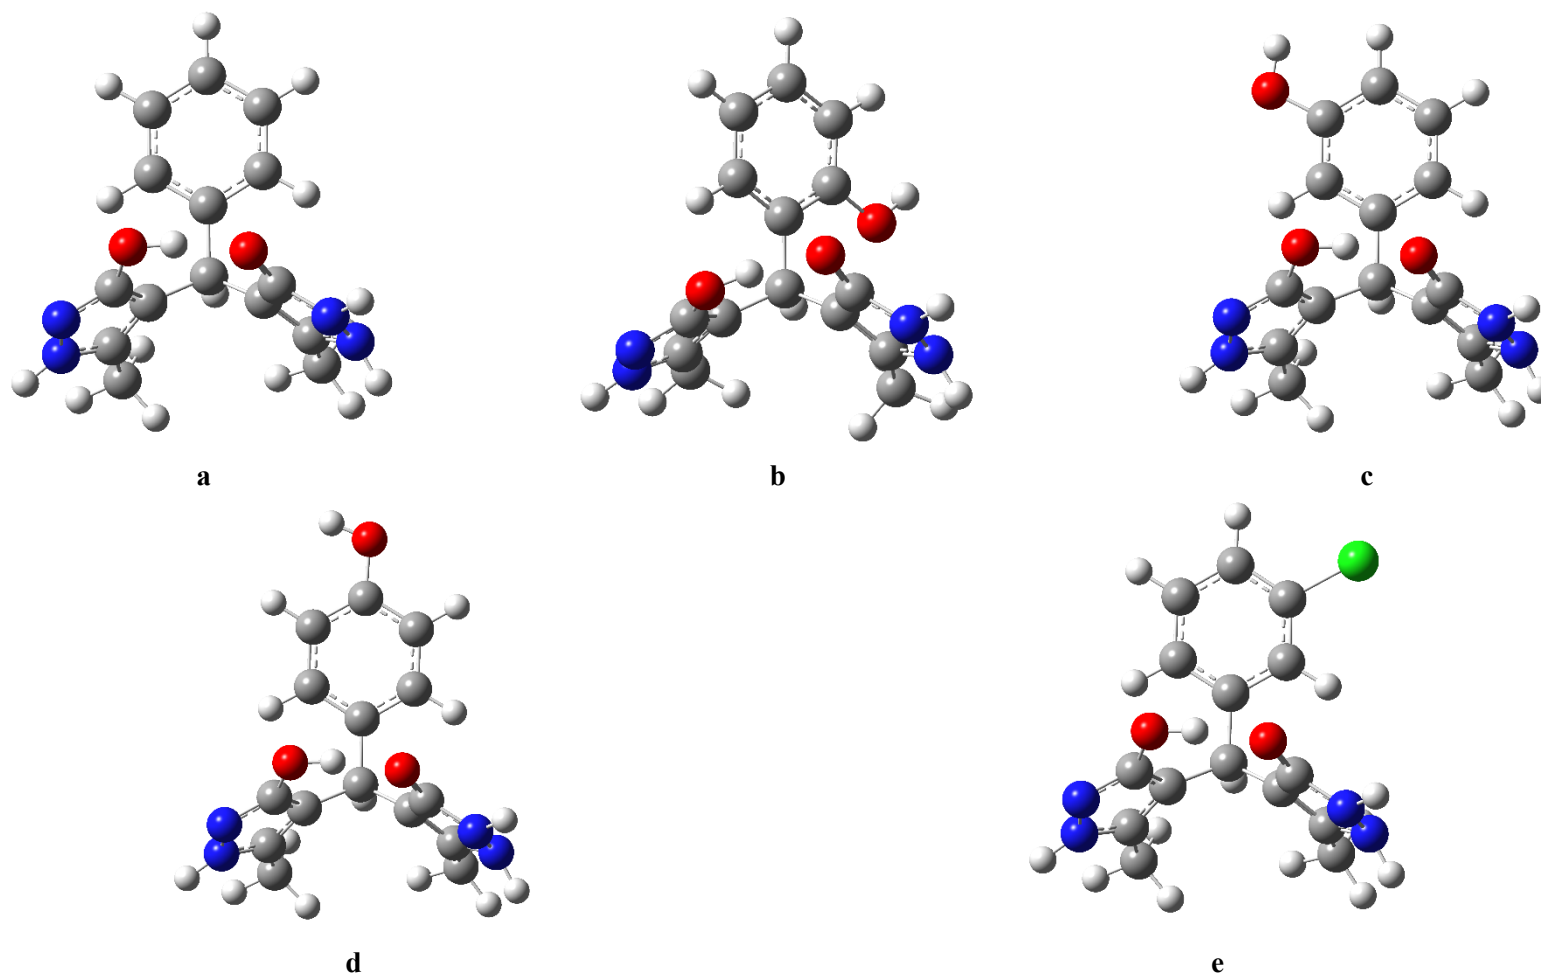

**Figure S5.** Optimized geometries of compounds **a–e** in water.

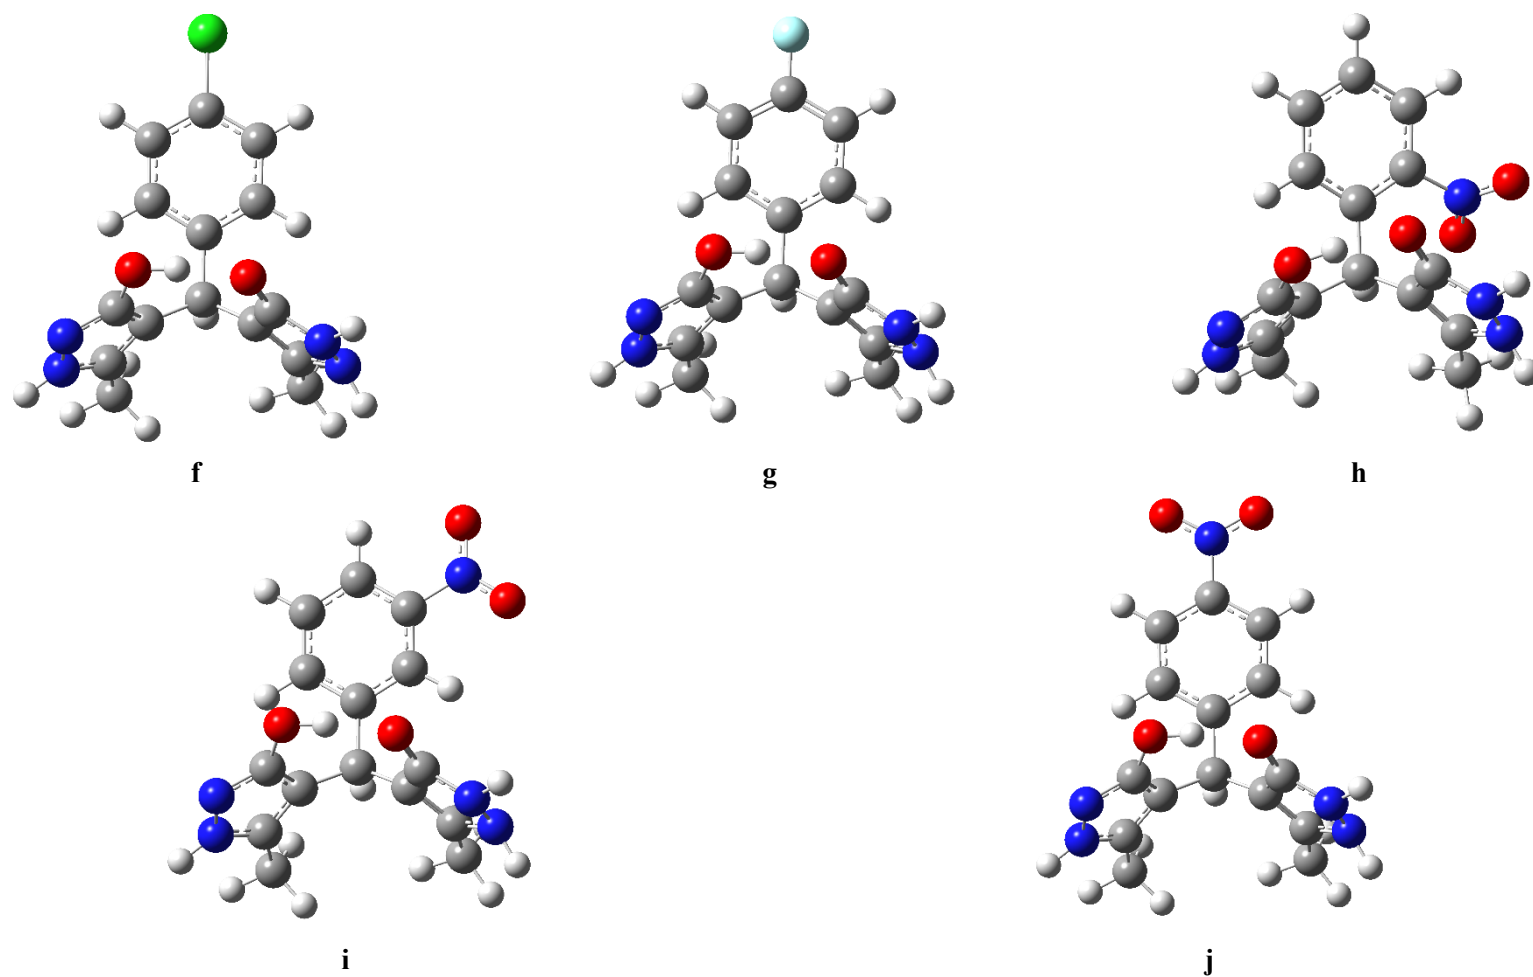

**Figure S6.** Optimized geometries of compounds **f–j** in water.

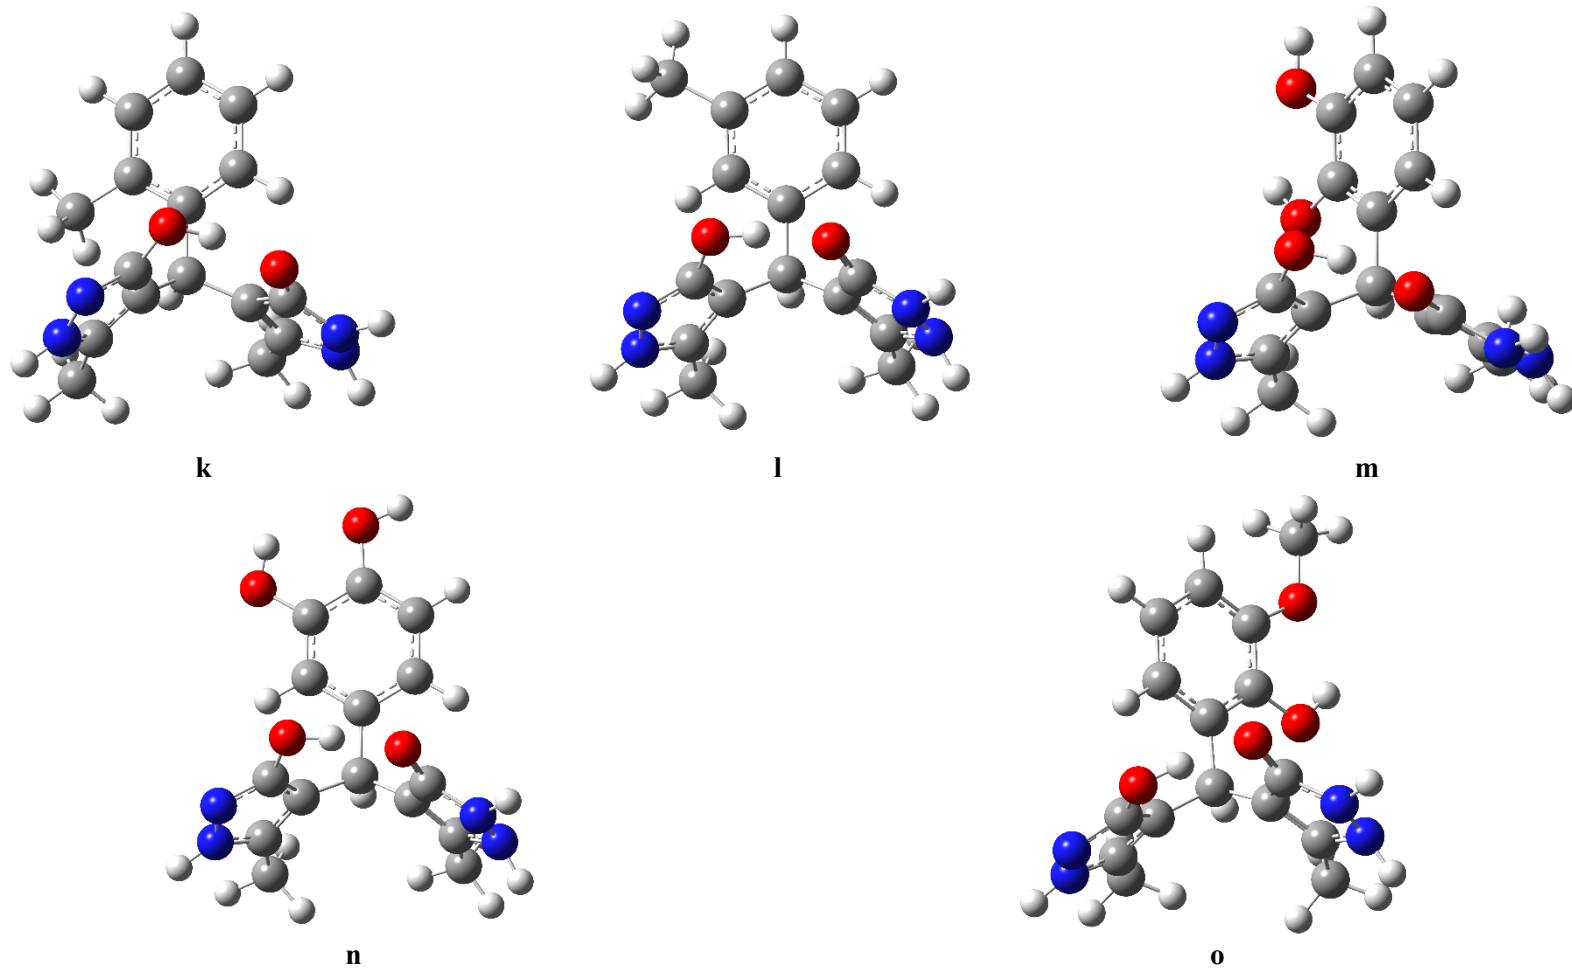

**Figure S7.** Optimized geometries of compounds **k–o** in water.

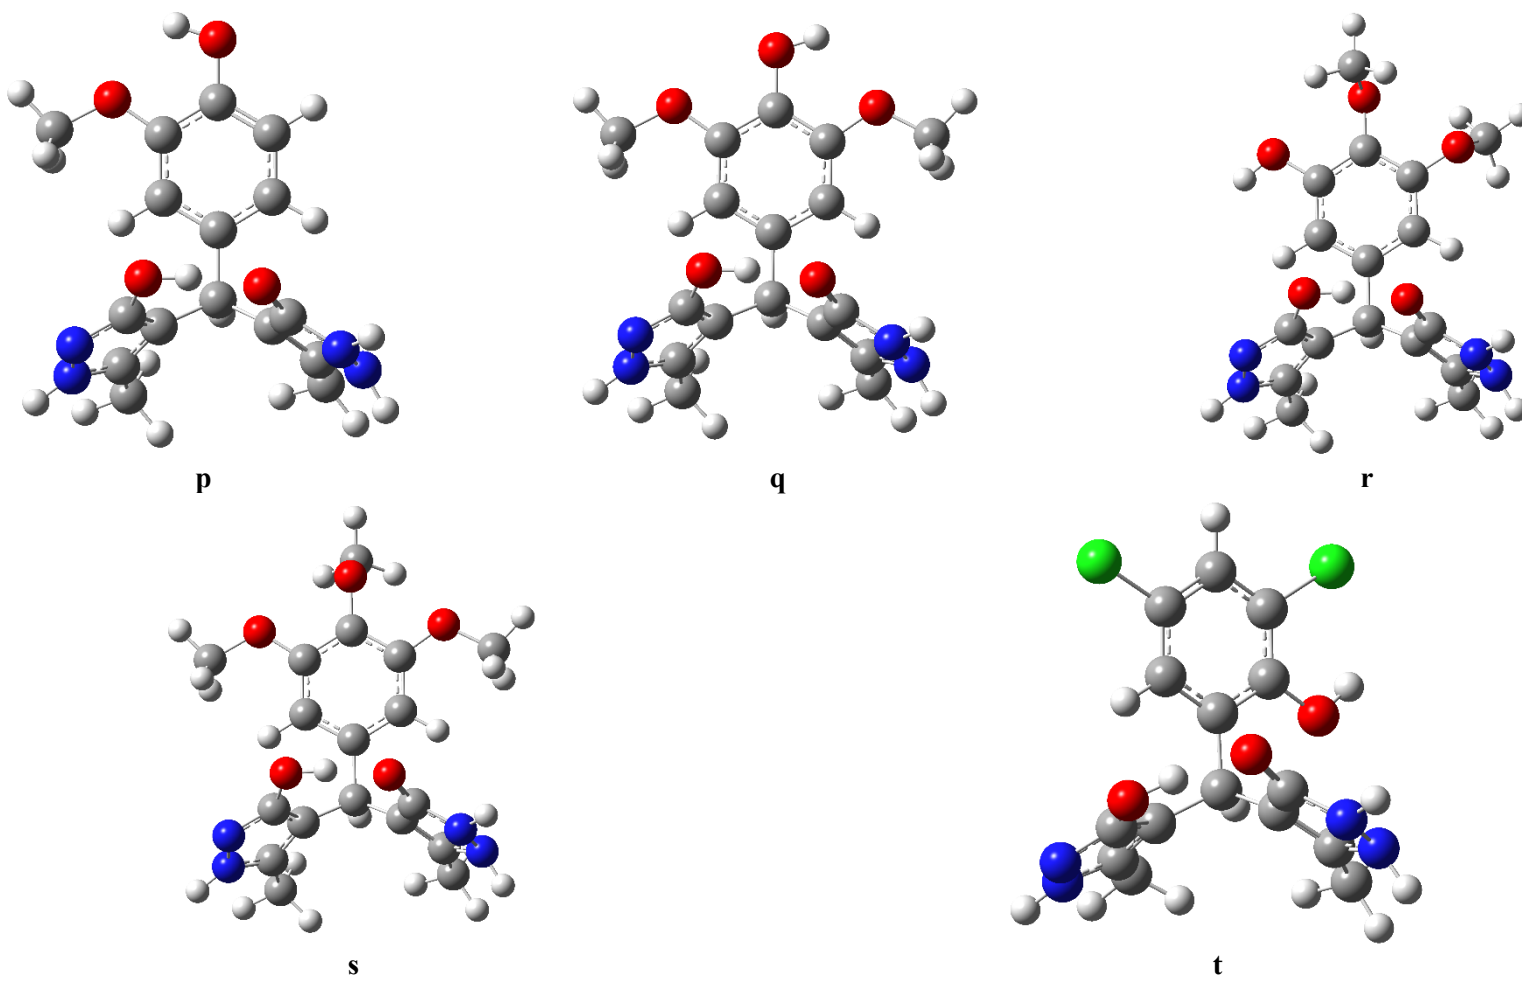

**Figure S8.** Optimized geometries of compounds **p–t** in water.

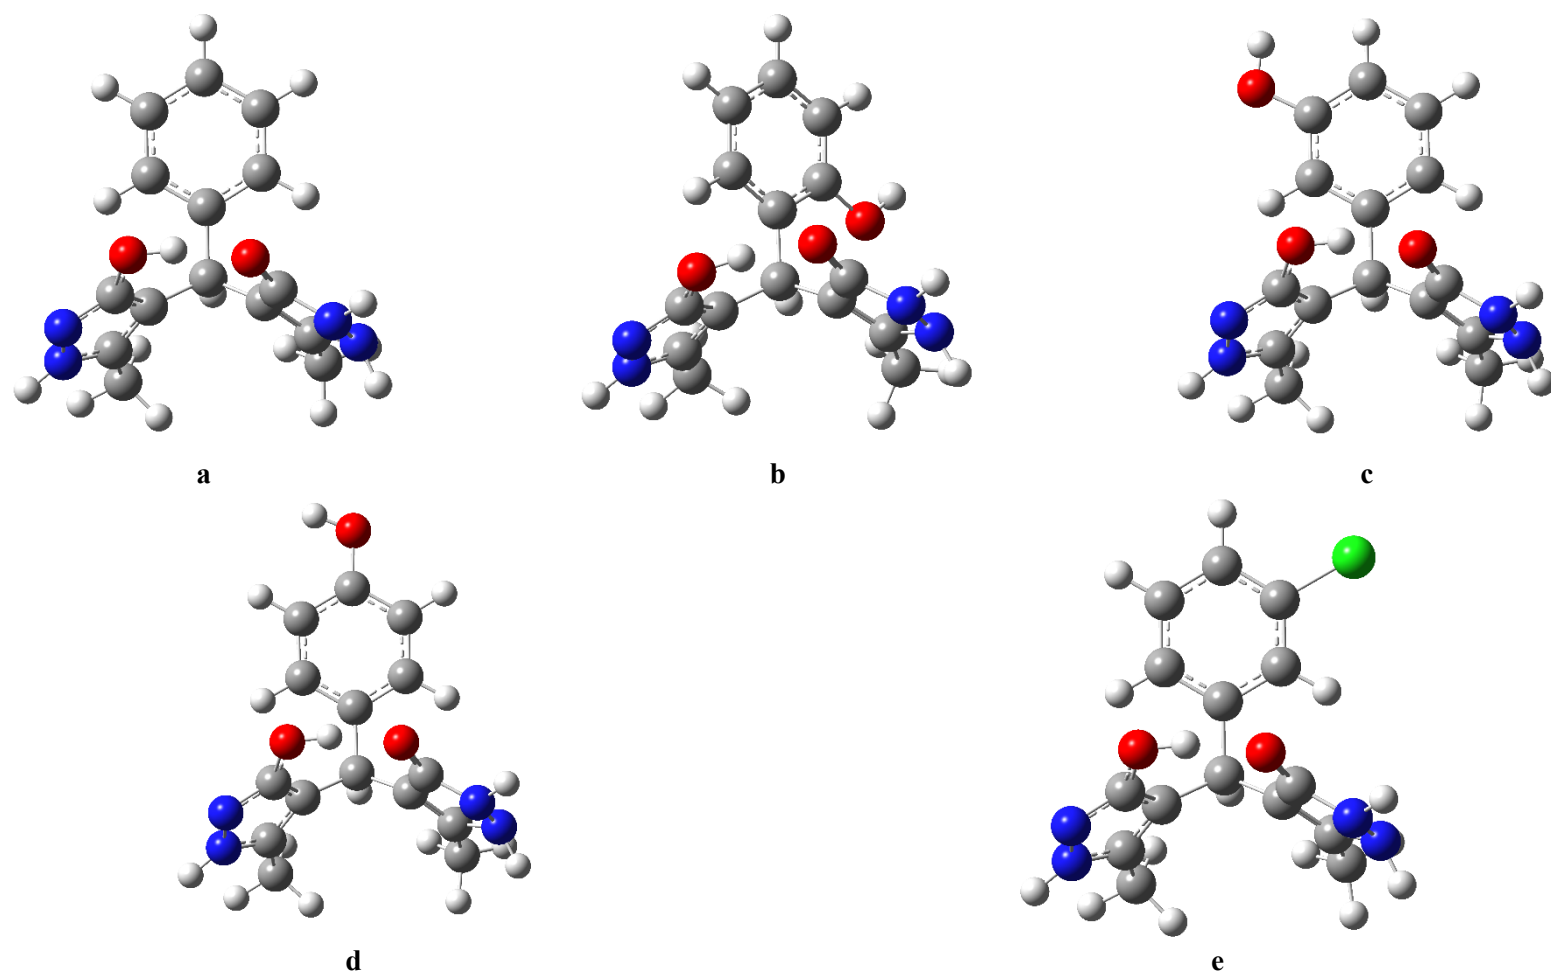

**Figure S9.** Optimized geometries of compounds a–e in benzene.

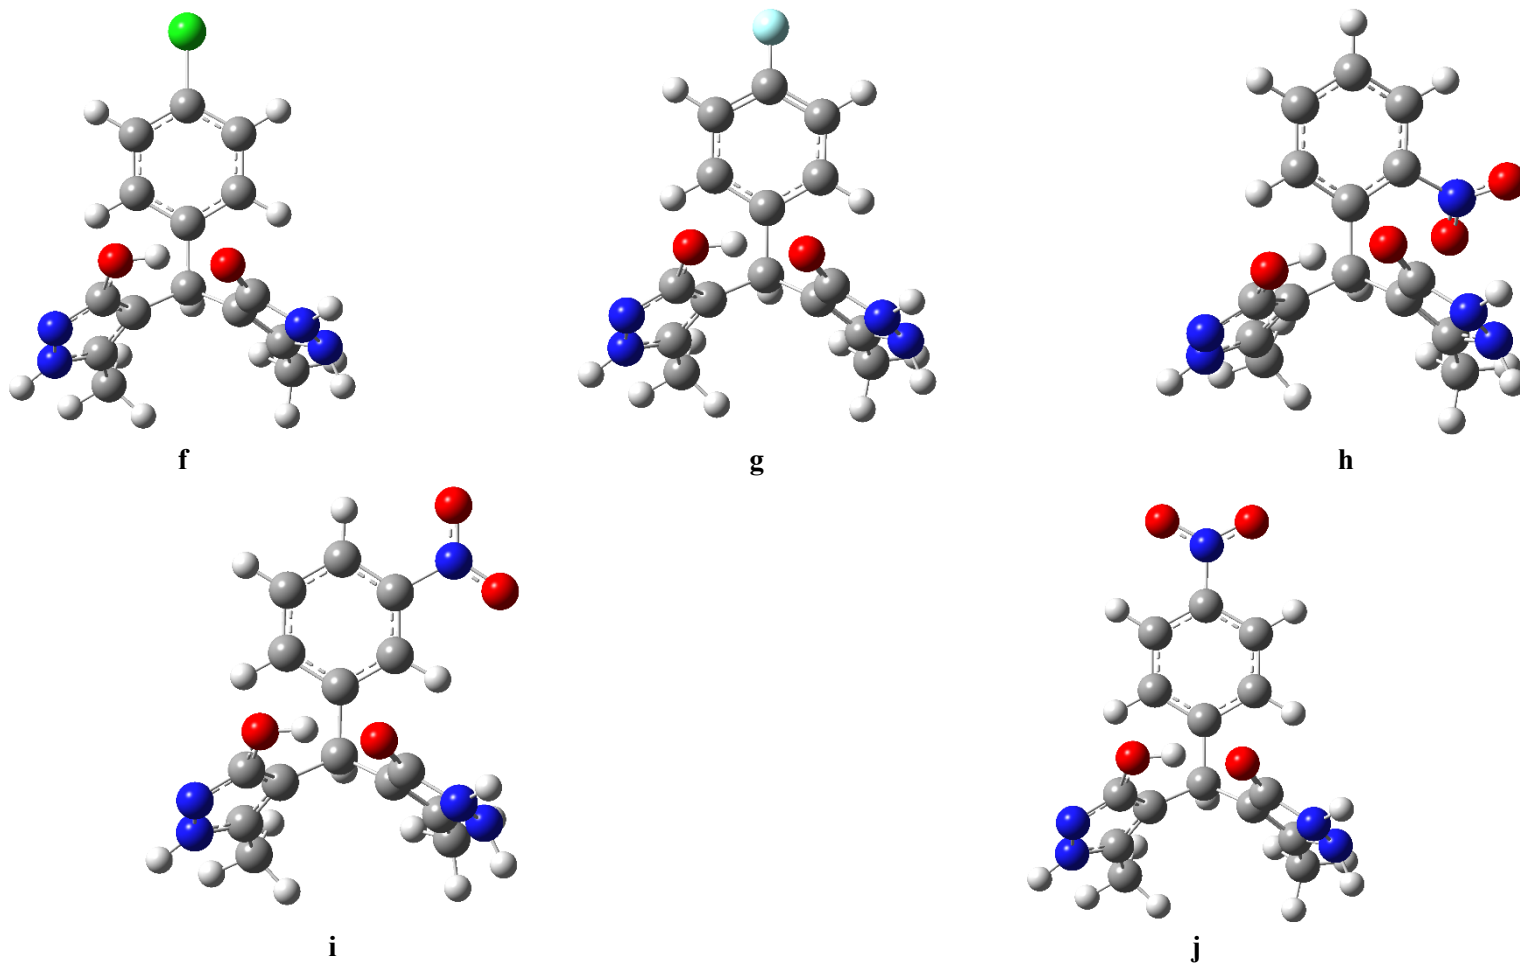

**Figure S10.** Optimized geometries of compounds f–j in benzene.

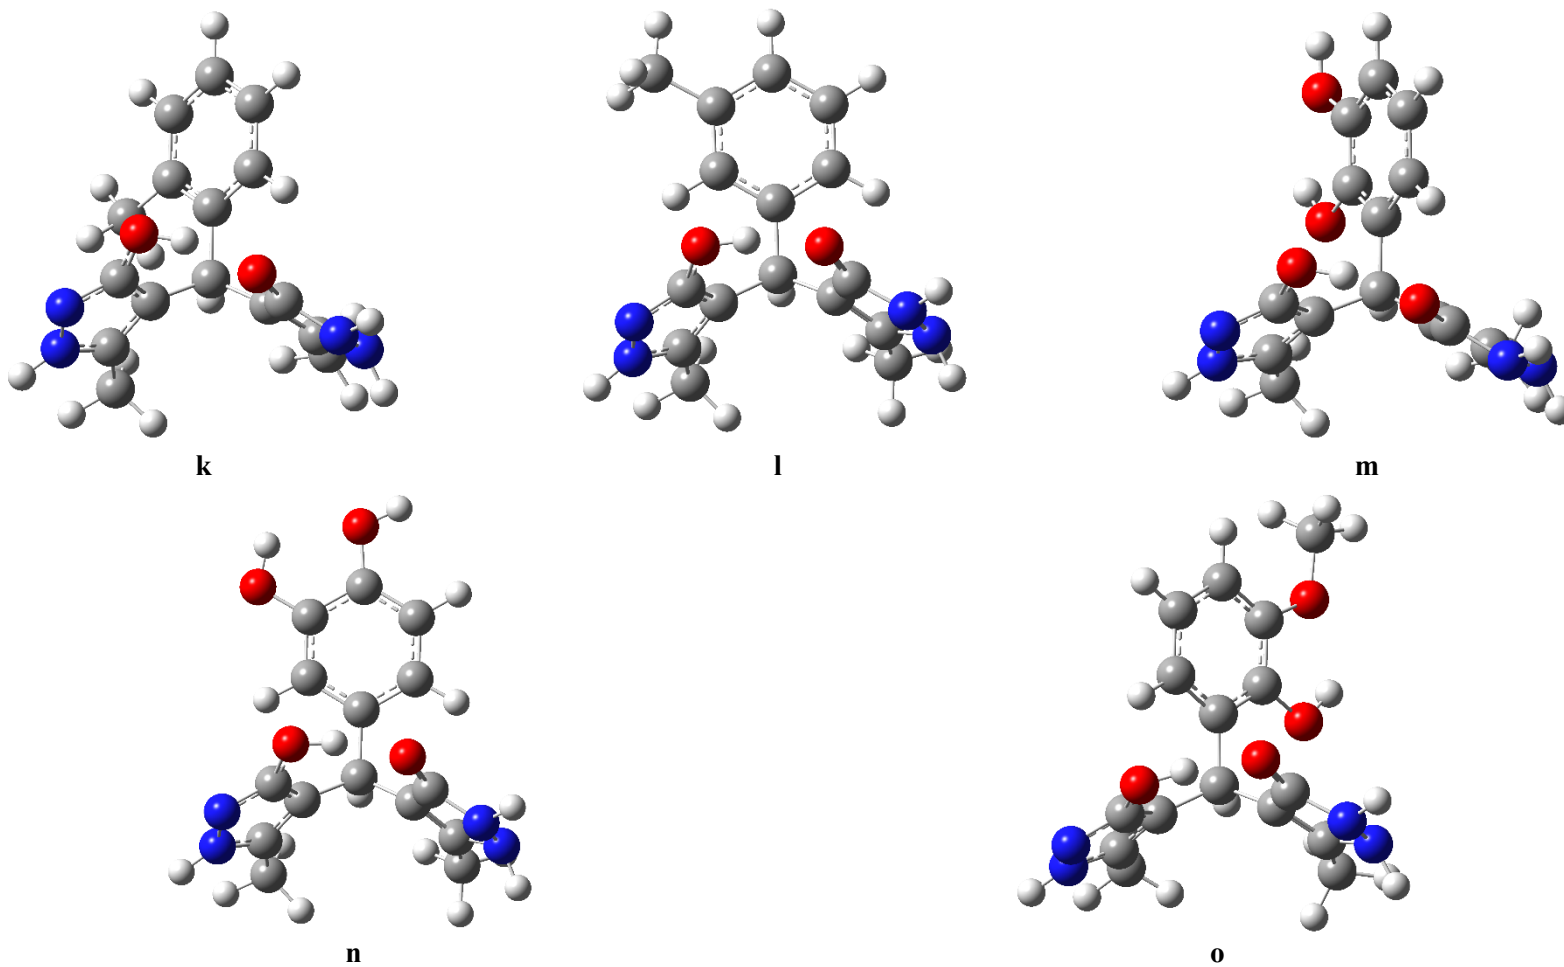

**Figure S11.** Optimized geometries of compounds **k–o** in benzene.



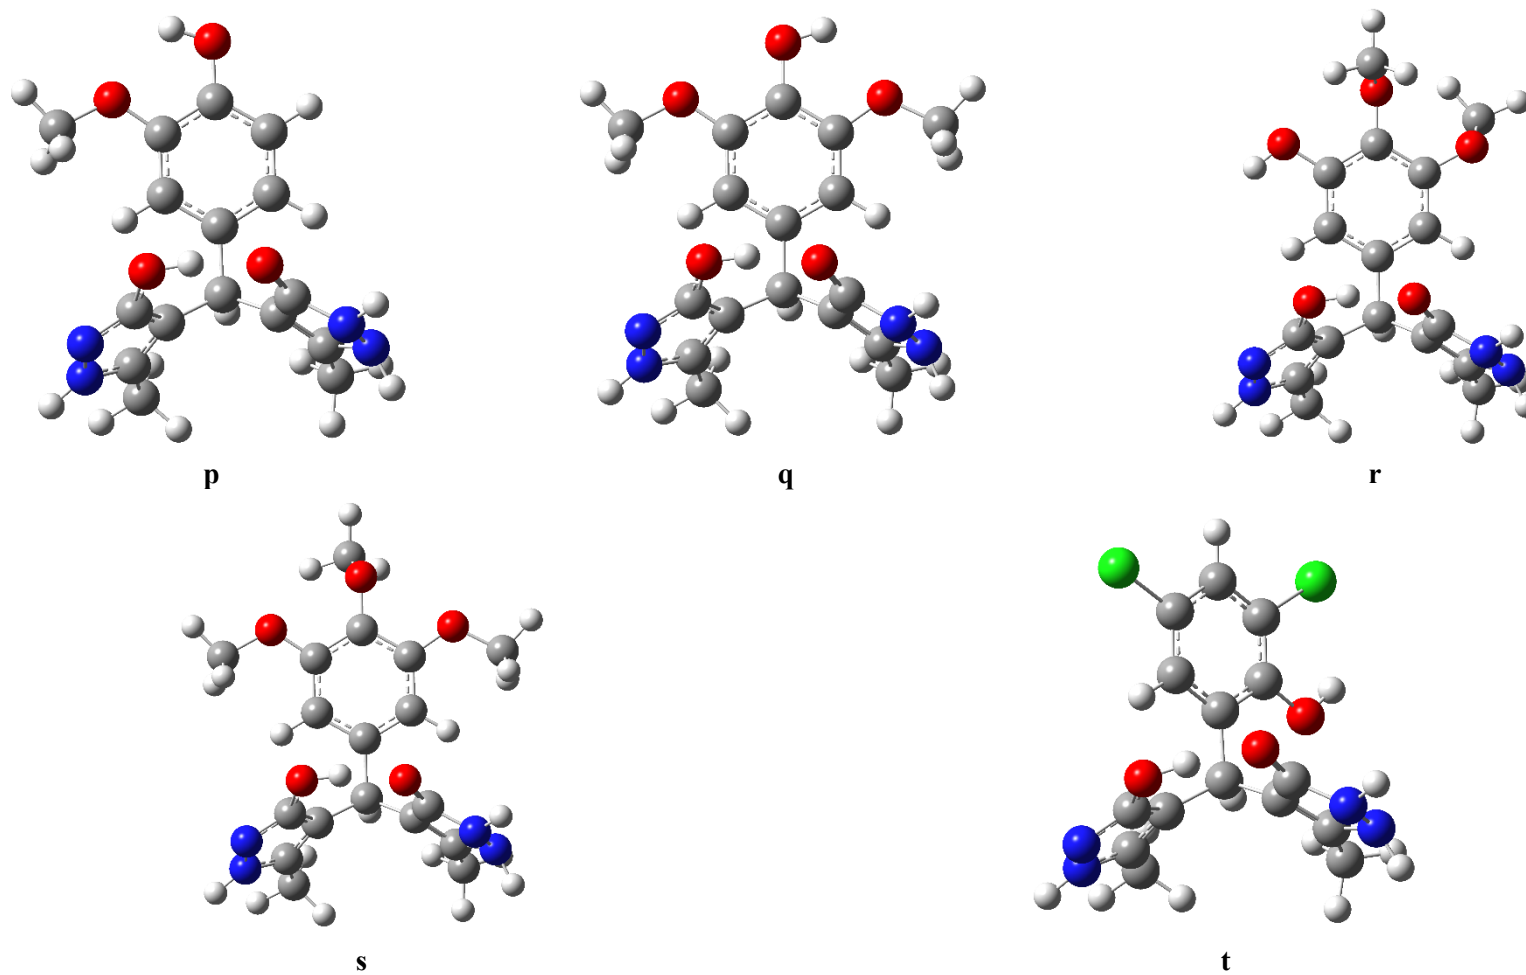

**Figure S12.** Optimized geometries of compounds **p–t** in benzene.
